# Supplementary material for: The search for a maximum of the D–π–A paradigm for second order nonlinear optical molecular materials
Source: Royal Society of Chemistry journal article supplement (doi:10.1039/d3cp03756h), 2023-01-01
Supplement: d3cp03756h1.pdf [file d3cp03756h1.pdf]

## Supporting Information

### Search a maximum of the D- $\pi$ -A paradigm for second order nonlinear optical molecular materials

Cui-Cui Yang,<sup>#ab</sup> Xiao Su,<sup>#b</sup> Qi-Zheng Zheng,<sup>b</sup> Jiu Chen,<sup>b</sup> Wei Quan Tian,<sup>\*b</sup> Wei-Qi Li,<sup>\*cde</sup> Ling Yang<sup>\*f</sup>

<sup>a</sup>College of Science, Chongqing University of Technology, Chongqing 400054, P. R. China

<sup>b</sup>Chongqing Key Laboratory of Theoretical and Computational Chemistry, College of Chemistry and Chemical Engineering, Chongqing University, Huxi Campus, Chongqing 401331, P. R. China

<sup>c</sup>School of Physics, Harbin Institute of Technology, Harbin 150001 P. R. China

<sup>d</sup>Technology Innovation Center of Materials and Devices at Extreme Environment, School of Materials Science and Engineering, Harbin Institute of Technology, Harbin 150001, China

<sup>e</sup>Collaborative Innovation Center of Extreme Optics, Shanxi University, Taiyuan 030006, P. R. China

<sup>f</sup>Wenzhou Institute, University of Chinese Academy of Sciences, 1 Jinlian Street, Wenzhou 325001, China

\*Corresponding author: tianwq@cqu.edu.cn; tccliweiqi@hit.edu.cn; lyang@ucas.ac.cn

<sup>#</sup>C. C. Yang and X. Su contributed equally to this work.

#### Supporting Information list:

**Fig. S1** Structure, frontier molecular orbitals and natural bond orbital (NBO) analysis of styrene.

**Fig. S2** Structures of Da(Baz/Baz(r))Ac and D7Bb(n)A4 series of molecules predicted with B3LYP/6-31G(d,p).

**Fig. S3** Evolution of the static first hyperpolarizability ( $\langle\beta_0\rangle$ ) with the numbers of excited states in D7BazA4.

**Fig. S4** Evolution of the static first hyperpolarizability ( $\langle\beta_0\rangle$ ) [predicted with TD-CAM-B3LYP/6-31++G(d,p)-SOS] with the electron excitations and the transitional nature of the electron excitations with major contributions to the  $\langle\beta_0\rangle$  of D7Bst(n=11)A4, D7(Betc/Betc')(n=11)A4 and D7Beae(n=11)A4, and the corresponding real space representation of electron (transparent cyan) and hole (transparent yellow) distributions of transition from ground state ( $S_0$ ) to excited states ( $S_e$ ) of these four molecules based on the electronic wavefunction predicted by using CAM-B3LYP/6-31++G(d,p) (plotted with isosurface value of 0.0005 a.u.).  $f$  is the oscillator strength (in a.u.). The red numbers are the distance ( $D_{\text{hole-ele}}$ , in Å) between the center of mass of hole (yellow sphere) and electron (cyan sphere).

**Fig. S5** Hyperpolarizability density [ $\rho_{xx}^{(2)}(\vec{r})$ ] (isovalue = 0.05 au) of (a) D7Bet(n=16)A4 and (b) D7Beta(n=11)A4. Blue and yellow colors indicate negative and positive spatial contributions,

respectively.

**Fig. S6** Evolution of the static first hyperpolarizability ( $\langle\beta_0\rangle$ ) [predicted with TD-CAM-B3LYP/6-31++G(d,p)-SOS] with the electron excitations and the transitional nature of the electron excitations with major contributions to the  $\langle\beta_0\rangle$  of D7Beta(r)(n=11)A4, D7Baet(n=11)A4 and D7Ba(r)et(n=11)A4, and the corresponding real space representation of electron (transparent cyan) and hole (transparent yellow) distributions of transition from ground state ( $S_0$ ) to excited states ( $S_e$ ) of these three molecules based on the electronic wavefunction predicted by using CAM-B3LYP/6-31++G(d,p) (plotted with isosurface value of 0.0005 a.u.).  $f$  is the oscillator strength (in a.u.). The red numbers are the distance ( $D_{\text{hole-ele}}$ , in Å) between the center of mass of hole (yellow sphere) and electron (cyan sphere).

**Fig. S7** Evolution of the static first hyperpolarizability ( $\langle\beta_0\rangle$ ) with the electron excitation and the transition nature of the electron excitations with major contributions to the  $\langle\beta_0\rangle$  of D7Baze(n=4)A4 and D7Bst(n=13)A4.  $f$  is the oscillator strength in a.u. unit.

**Fig. S8** The static first hyperpolarizability per heavy atom ( $\langle\beta_0\rangle/N$ ), and the frequency-dependent first hyperpolarizability per heavy atom in the process of second harmonic generation (SHG) [ $\beta(-2\omega; \omega, \omega)$ ] and electro-optical Pockels effect (EOPE) [ $\beta(-\omega; \omega, 0)$ ] of D7Bet(n=16)A4 and D7Beta(n=11)A4 at 1064 nm predicted by using TD-CAM-B3LYP/6-31++G(d,p)-SOS, respectively.

**Fig. S9** The contour plot of predicted two-dimensional second order nonlinear optical spectra (in  $10^{-30}$  esu) of D7Bet(n=16) A4 and D7Beta(n=11)A4 in external fields up to 7.00 eV with a scanning step size of 0.05 eV.

**Fig. S10** Two-dimensional second order NLO spectra of (a/b/c) D7Bet(n=16)A4 and (d/e) D7Beta(n=11)A4 with a step size of 0.005 eV. [(a)  $\omega_1$  scanned from 1.20 eV to 2.20 eV and  $\omega_2$  scanned from -0.50 eV to 0.50 eV; (b)  $\omega_1$  scanned from 1.90 eV to 2.90 eV and  $\omega_2$  scanned from -2.20 eV to -1.20 eV; (c)  $\omega_1$  scanned from 1.15 eV to 2.15 eV and  $\omega_2$  scanned from 0.30 eV to 1.30 eV; (d)  $\omega_1$  scanned from 1.15 eV to 2.15 eV and  $\omega_2$  scanned from 0.20 eV to 1.20 eV; (e)  $\omega_1$  scanned from 1.85 eV to 2.85 eV and  $\omega_2$  scanned from -2.15 eV to -1.15 eV].

**Table S1** The electronic properties of styrene, different donors (D1 to D8) doped benzene, and different acceptors (A1 to A8) doped ethylene predicted with B3LYP/6-31G(d,p).

**Table S2** The electronic properties [predicted with B3LYP/6-31G(d,p)] and static first hyperpolarizability per heavy atom ( $\langle\beta_0\rangle/N$ , N is the numbers of heavy atoms) of D8(Baz/Baz(r))A4, D7(Baz/Baz(r))A4 and D7Bb(n)A4 predicted with using TD-CAM-B3LYP/6-31++G(d,p)-SOS.

**Table S3** The electronic properties of DaAc, DaBaz(r)Ac and DaBazAc series of molecules predicted

with B3LYP/6-31G(d,p).

**Table S4** The static first hyperpolarizability ( $\langle\beta_0\rangle$ , in  $10^{-30}$  esu), and the  $\langle\beta_0\rangle/N$  ( $N$  is the numbers of heavy atoms) of DaAc, DaBaz(r)Ac and DaBazAc series of molecules predicted with using TD-CAM-B3LYP/6-31++G(d,p)-SOS and CAM-B3LYP/6-31++G(d,p)-CPKS (in brackets), respectively.

**Table S5** The electronic properties [predicted with B3LYP/6-31G(d,p)] and static first hyperpolarizability ( $\langle\beta_0\rangle$ ) ( $\times 10^{-30}$  esu) [predicted with TD-CAM-B3LYP/6-31++G(d,p)-SOS] of D7Bb(n)A4 series of molecules.

**Table S6** Major electronic excitations with transitional nature of D8(Baz/Baz(r))A4, D7(Baz/Baz(r))A4, Exp, BAY1 and D7Bb(n)A4 series of molecules.  $f$  is the oscillator strength in a.u. unit;  $E_t$  is the transition energy in eV (nm) unit;  $\langle\beta_0\rangle_{\text{con}}$  (contribution value to  $\langle\beta_0\rangle$ ) and  $\langle\beta_0\rangle_{\text{total}}$  are in  $10^{-30}$  esu unit.

**Table S7** Predicted major  $\beta_{ijk}$  [ $i, j, k \in (x, y, z)$ ] ( $\times 10^{-30}$  esu) of D8(Baz/Baz(r))A4, D7(Baz/Baz(r))A4 and D7Bb(n)A4 series of molecules, and properties of the related states with important contributions to the  $\beta_{ijk}$  according to the SOS model.  $E_t$  is the transition energy in eV unit;  $m$  is the state number ( $m=0$  is the ground state,  $m>0$  is the  $m$ th excited state).

**Table S8** Calculated electronic properties [predicted with B3LYP/6-31G(d,p)] and static first hyperpolarizability ( $\langle\beta_0\rangle$ ) (in  $10^{-30}$  esu) and  $\langle\beta_0\rangle$  per heavy atom ( $\langle\beta_0\rangle/N$ ) [predicted with TD-CAM-B3LYP/6-31++G(d,p)-SOS] for the experimentally and recently reported NLO molecules Exp and BAY1, respectively.

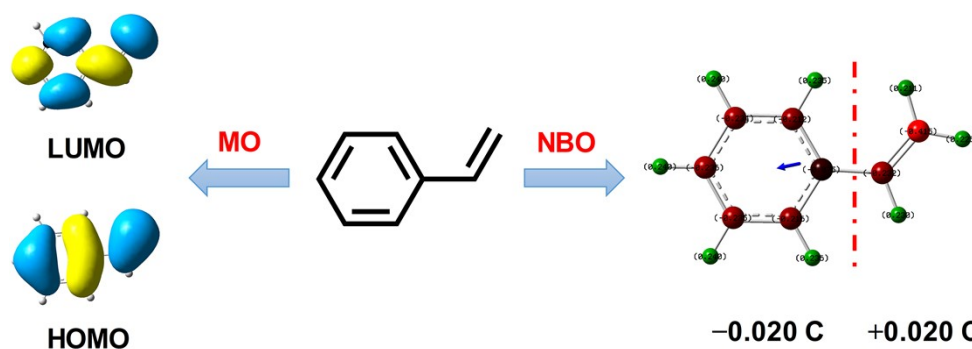

**Fig. S1** Structure, frontier molecular orbitals and natural bond orbital (NBO) analysis of styrene.

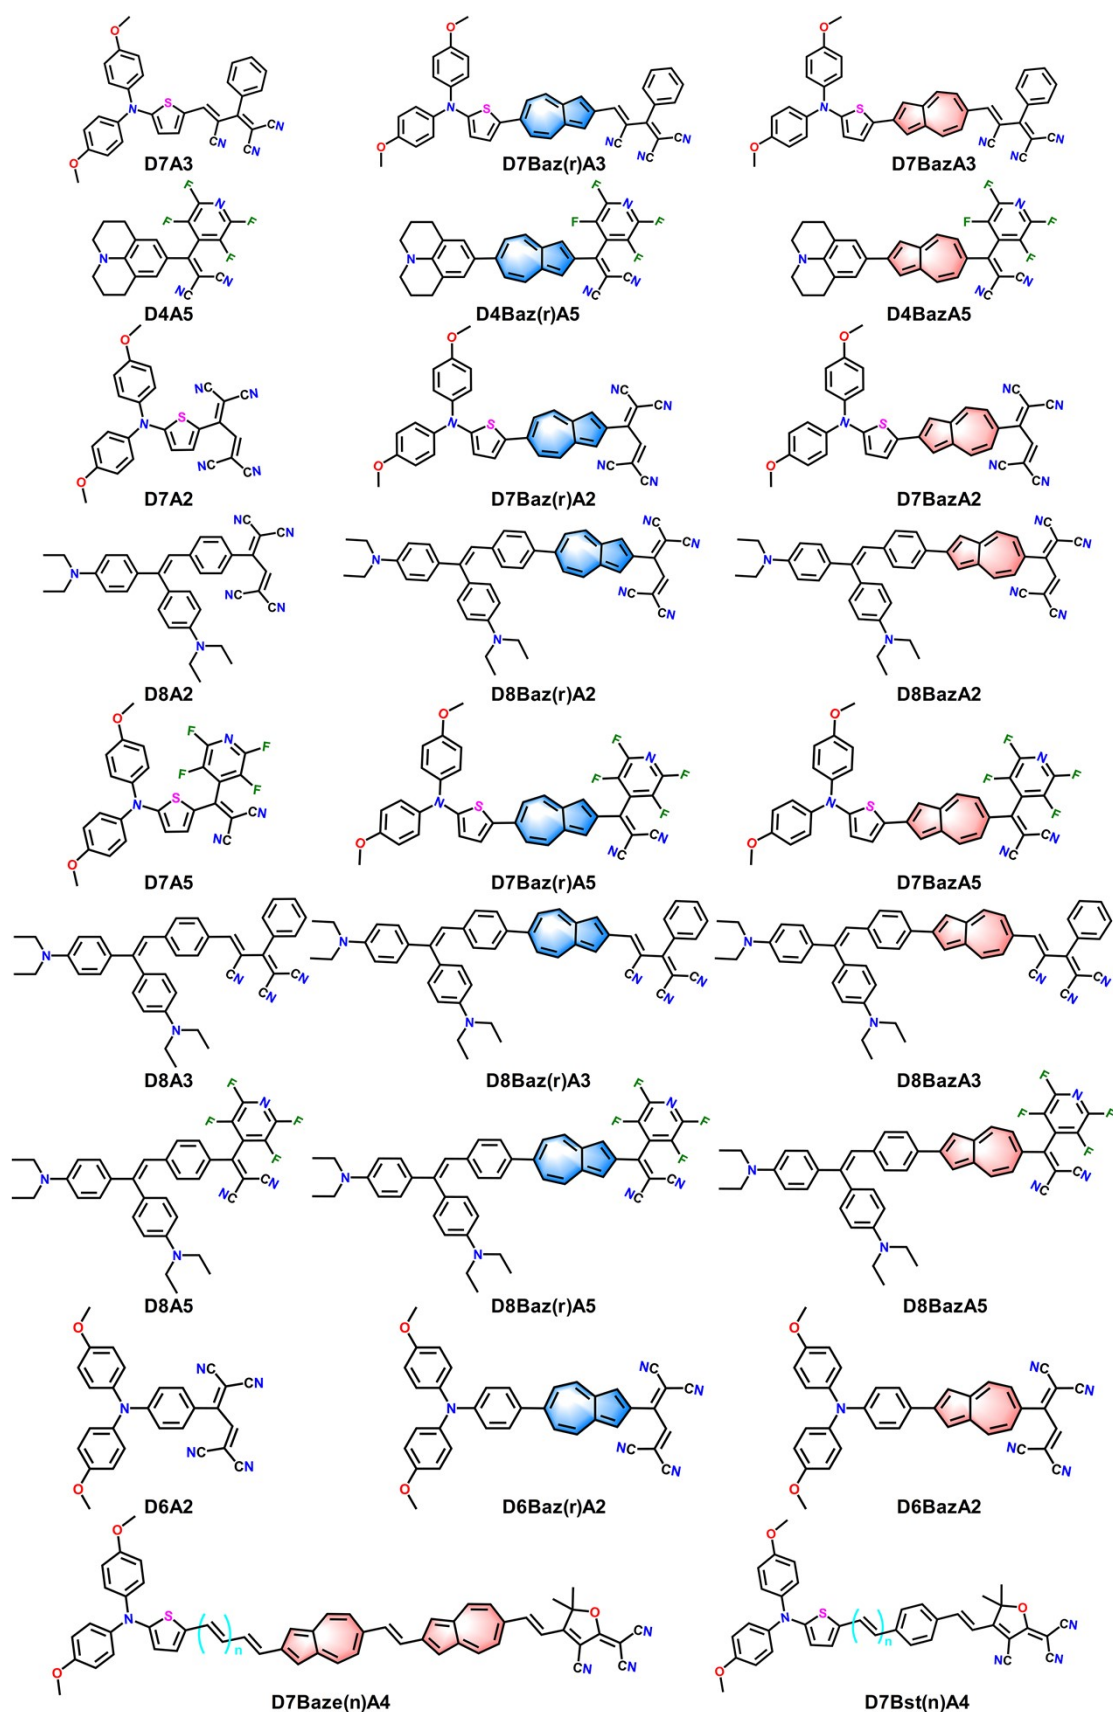

**Fig. S2** Structures of Da(Baz/Baz(r))Ac and D7Bb(n)A4 series of molecules predicted with B3LYP/6-31G(d,p).

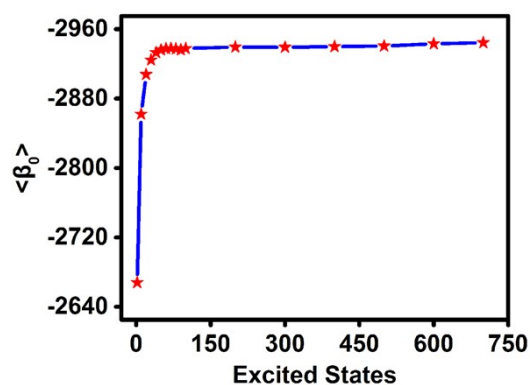

**Fig. S3** Evolution of the static first hyperpolarizability ( $\langle \beta_0 \rangle$ ) with the numbers of excited states in D7BazA4.

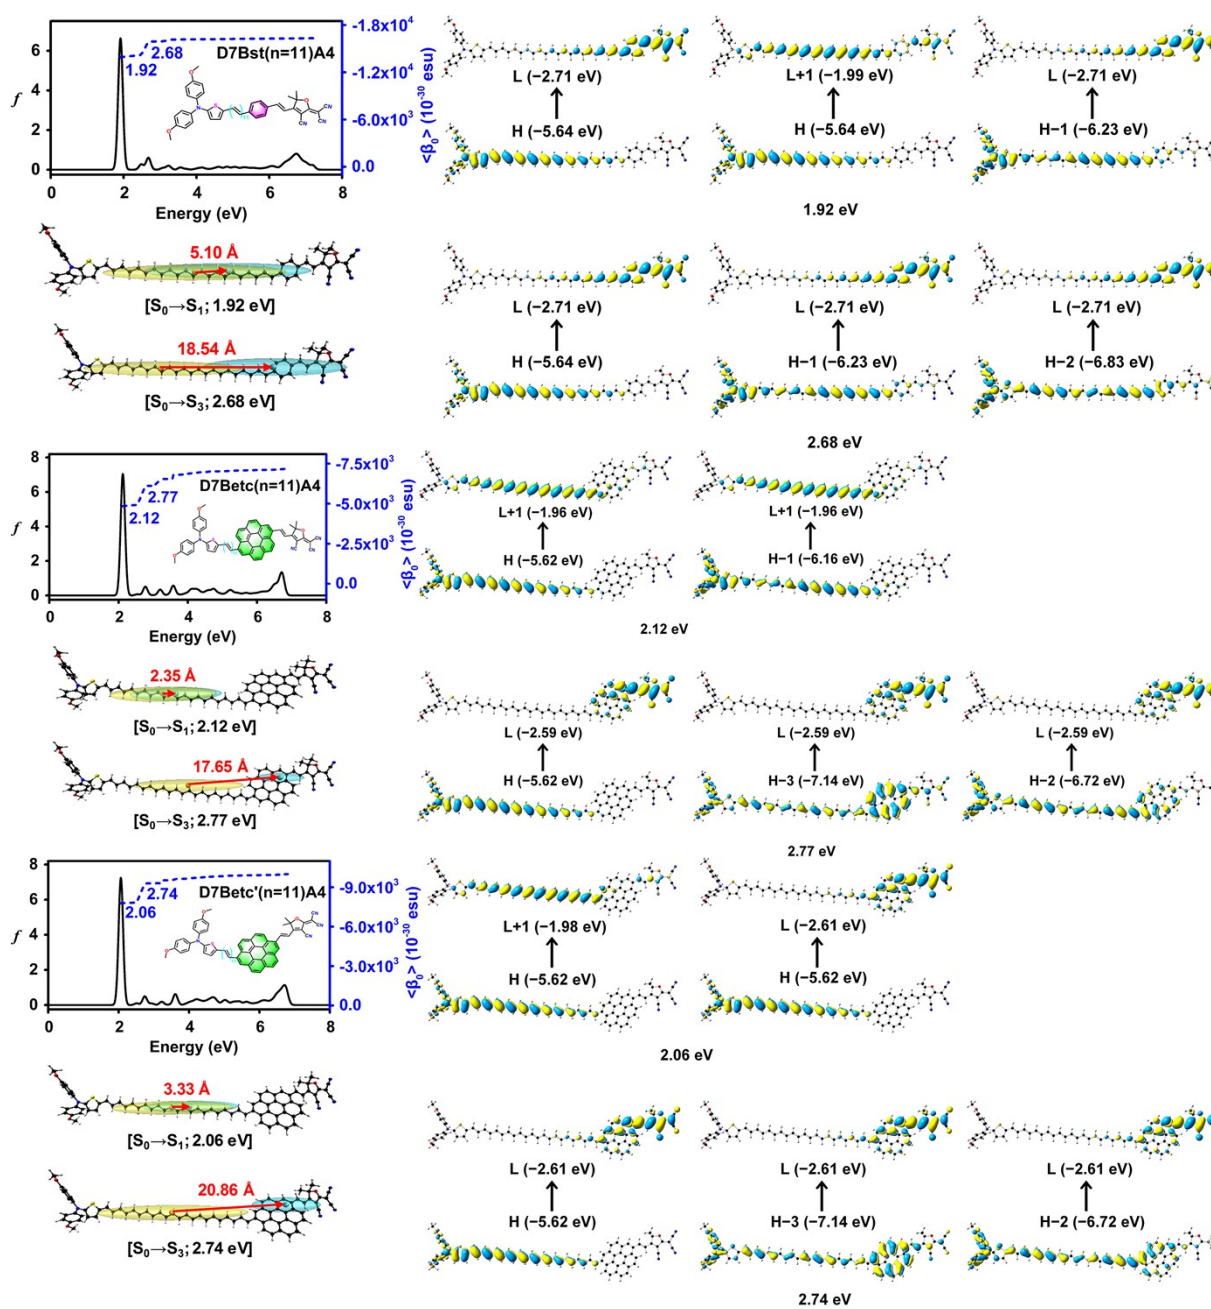

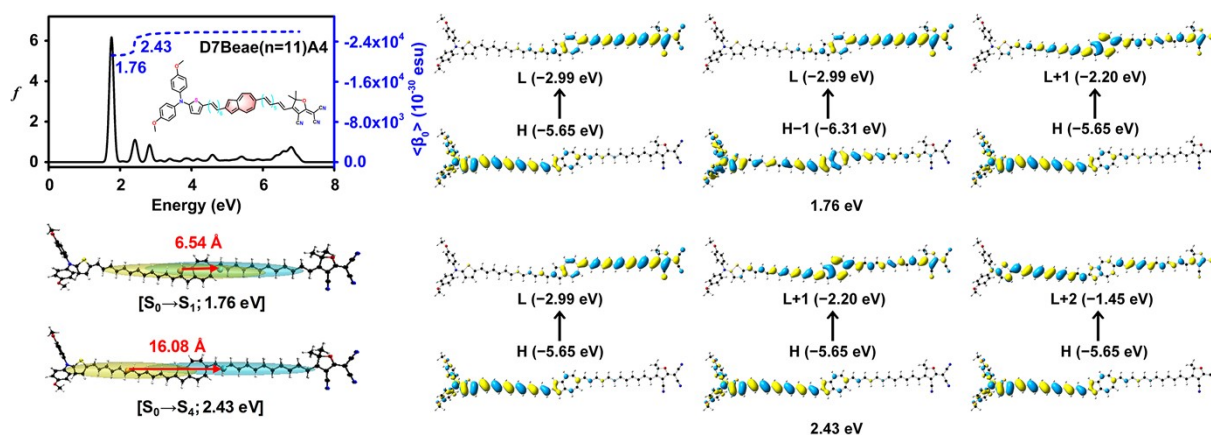

**Fig. S4** Evolution of the static first hyperpolarizability ( $\langle\beta_0\rangle$ ) [predicted with TD-CAM-B3LYP/6-31++G(d,p)-SOS] with the electron excitations and the transitional nature of the electron excitations with major contributions to the  $\langle\beta_0\rangle$  of D7Bst(n=11)A4, D7(Betc/Betc')(n=11)A4 and D7Beae(n=11)A4, and the corresponding real space representation of electron (transparent cyan) and hole (transparent yellow) distributions of transition from ground state ( $S_0$ ) to excited states ( $S_e$ ) of these four molecules based on the electronic wavefunction predicted by using CAM-B3LYP/6-31++G(d,p) (plotted with isosurface value of 0.0005 a.u.).  $f$  is the oscillator strength (in a.u.). The red numbers are the distance ( $D_{\text{hole-ele}}$ , in Å) between the center of mass of hole (yellow sphere) and electron (cyan sphere).

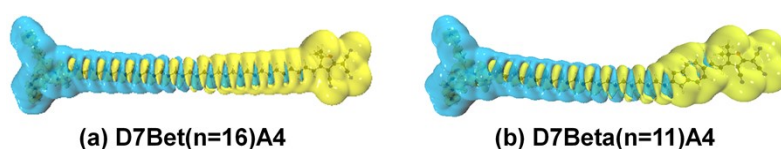

**Fig. S5** Hyperpolarizability density [ $\rho_{xx}^{(2)}(\vec{r})$ ] (isovalue = 0.05 au) of (a) D7Bet(n=16)A4 and (b) D7Beta(n=11)A4. Blue and yellow colors indicate negative and positive spatial contributions, respectively.

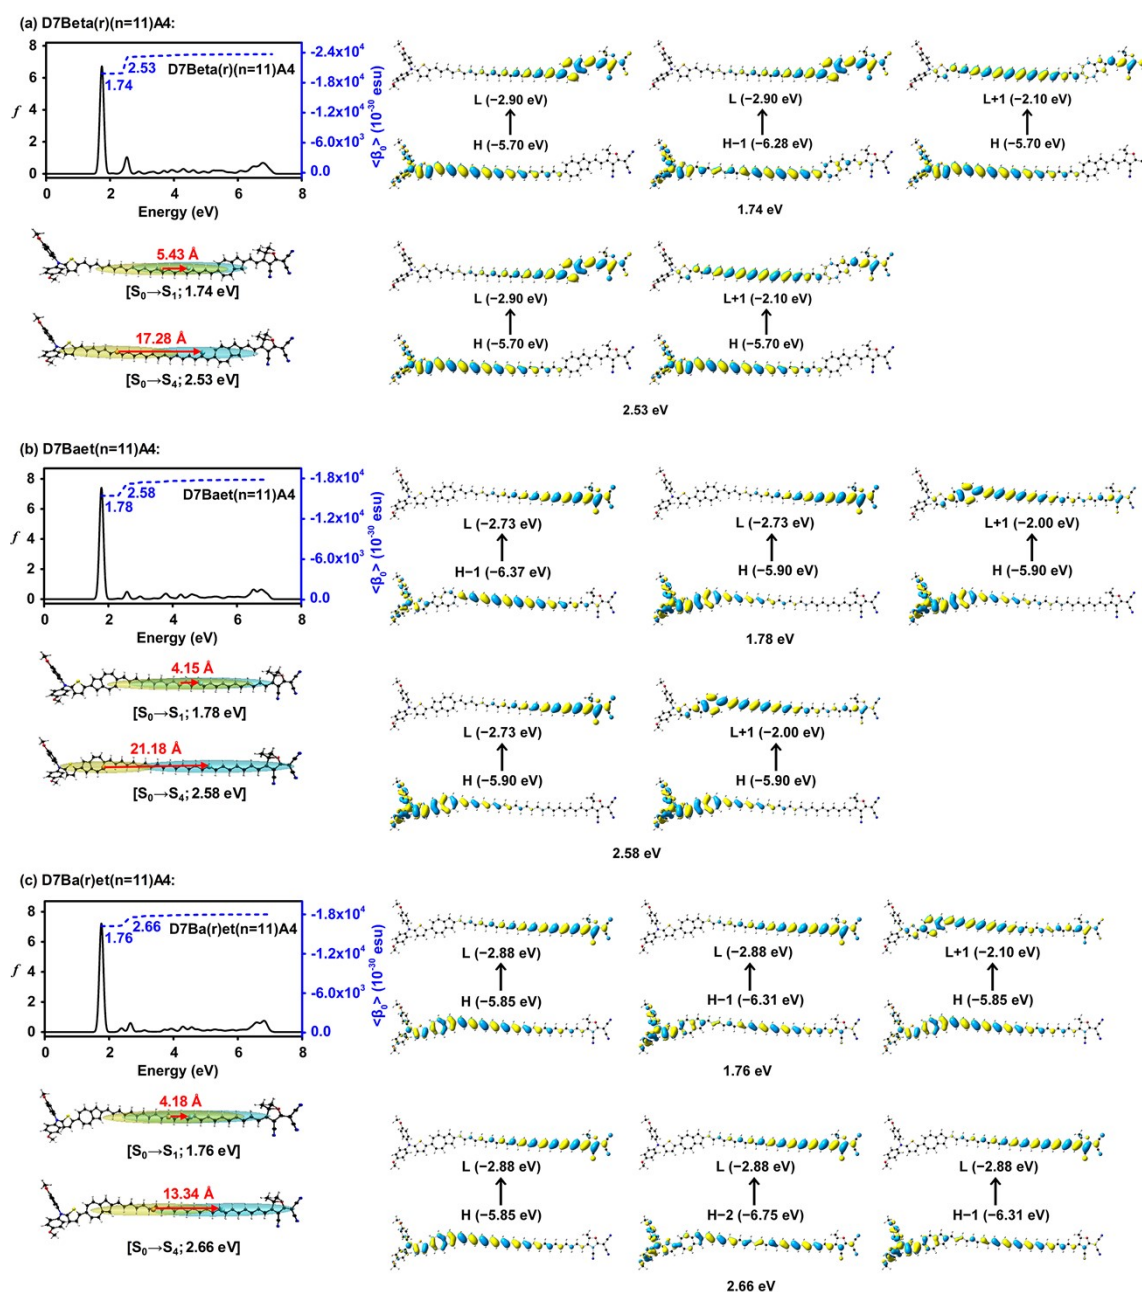

**Fig. S6** Evolution of the static first hyperpolarizability ( $\langle\beta_0\rangle$ ) [predicted with TD-CAM-B3LYP/6-31++G(d,p)-SOS] with the electron excitations and the transitional nature of the electron excitations with major contributions to the  $\langle\beta_0\rangle$  of D7Beta(r)(n=11)A4, D7Baet(n=11)A4 and D7Ba(r)et(n=11)A4, and the corresponding real space representation of electron (transparent cyan) and hole (transparent yellow) distributions of transition from ground state ( $S_0$ ) to excited states ( $S_e$ ) of these three molecules based on the electronic wavefunction predicted by using CAM-B3LYP/6-31++G(d,p) (plotted with isosurface value of 0.0005 a.u.).  $f$  is the oscillator strength (in a.u.). The red numbers are the distance ( $D_{\text{hole-ele}}$ , in Å) between the center of mass of hole (yellow sphere) and electron (cyan sphere).

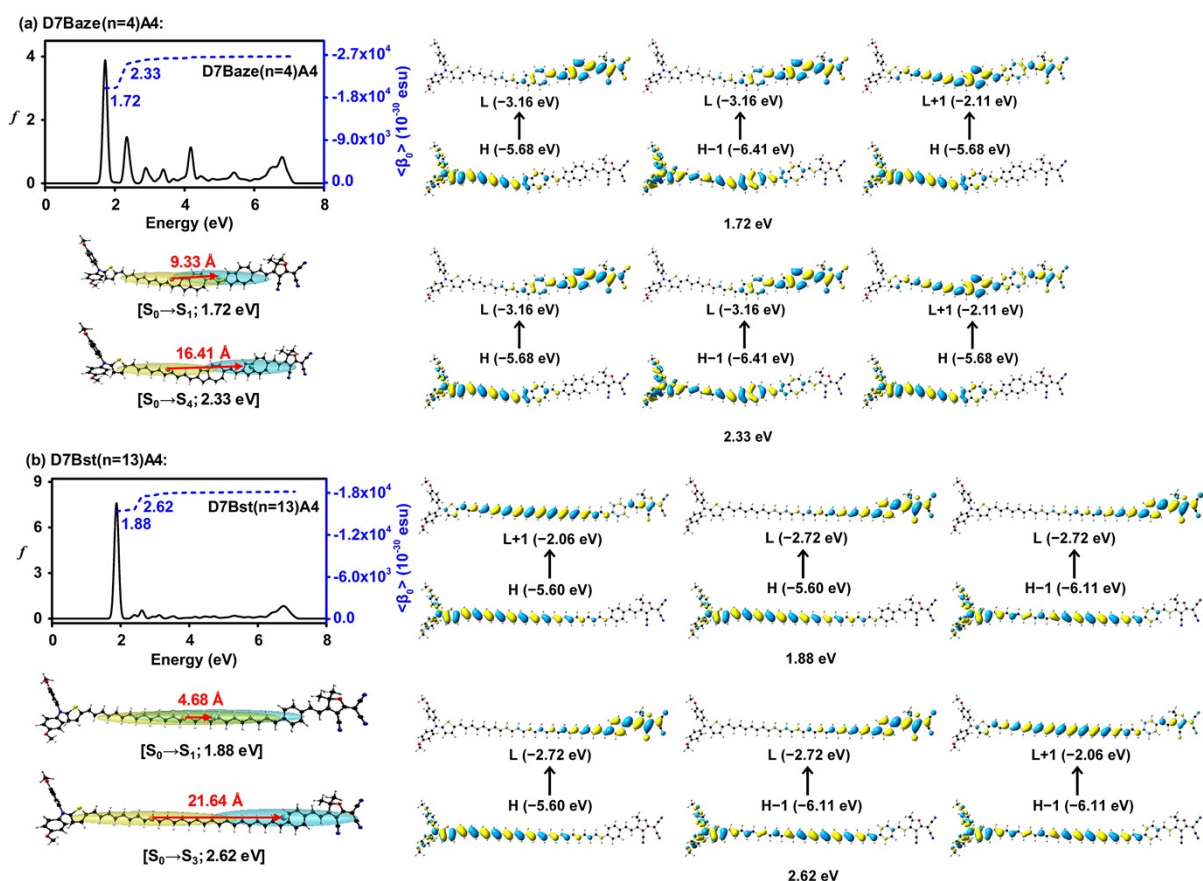

**Fig. S7** Evolution of the static first hyperpolarizability ( $\langle\beta_0\rangle$ ) with the electron excitation and the transition nature of the electron excitations with major contributions to the  $\langle\beta_0\rangle$  of D7Baze(n=4)A4 and D7Bst(n=13)A4.  $f$  is the oscillator strength in a.u. unit.

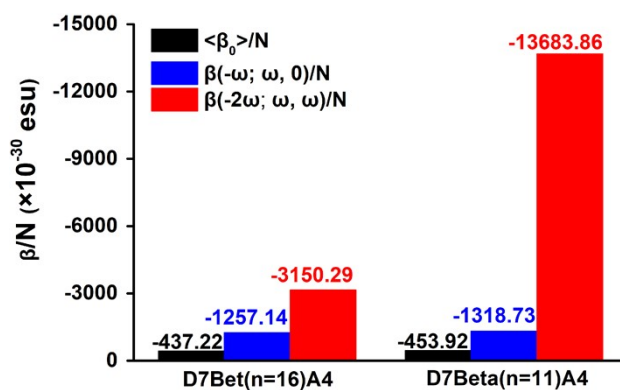

**Fig. S8** The static first hyperpolarizability per heavy atom ( $\langle\beta_0\rangle/N$ ), and the frequency-dependent first hyperpolarizability per heavy atom in the process of second harmonic generation (SHG) [ $\beta(-2\omega; \omega, \omega)$ ] and electro-optical Pockels effect (EOPE) [ $\beta(-\omega; \omega, 0)$ ] of D7Bet(n=16)A4 and D7Beta(n=11)A4 at 1064 nm predicted by using TD-CAM-B3LYP/6-31++G(d,p)-SOS, respectively.



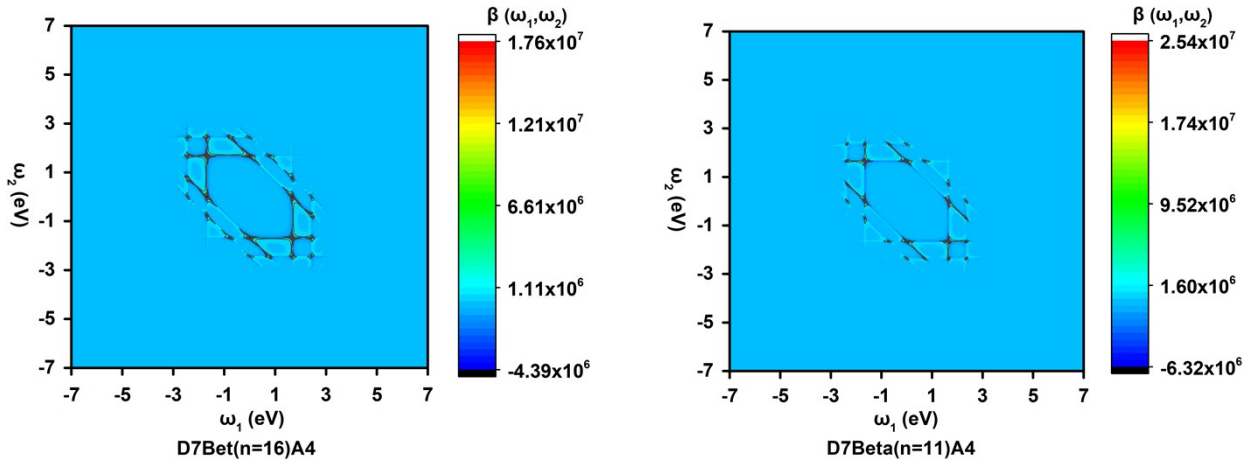

**Fig. S9** The contour plot of predicted two-dimensional second order nonlinear optical spectra (in  $10^{-30}$  esu) of D7Bet(n=16) A4 and D7Beta(n=11)A4 in external fields up to 7.00 eV with a scanning step size of 0.05 eV.

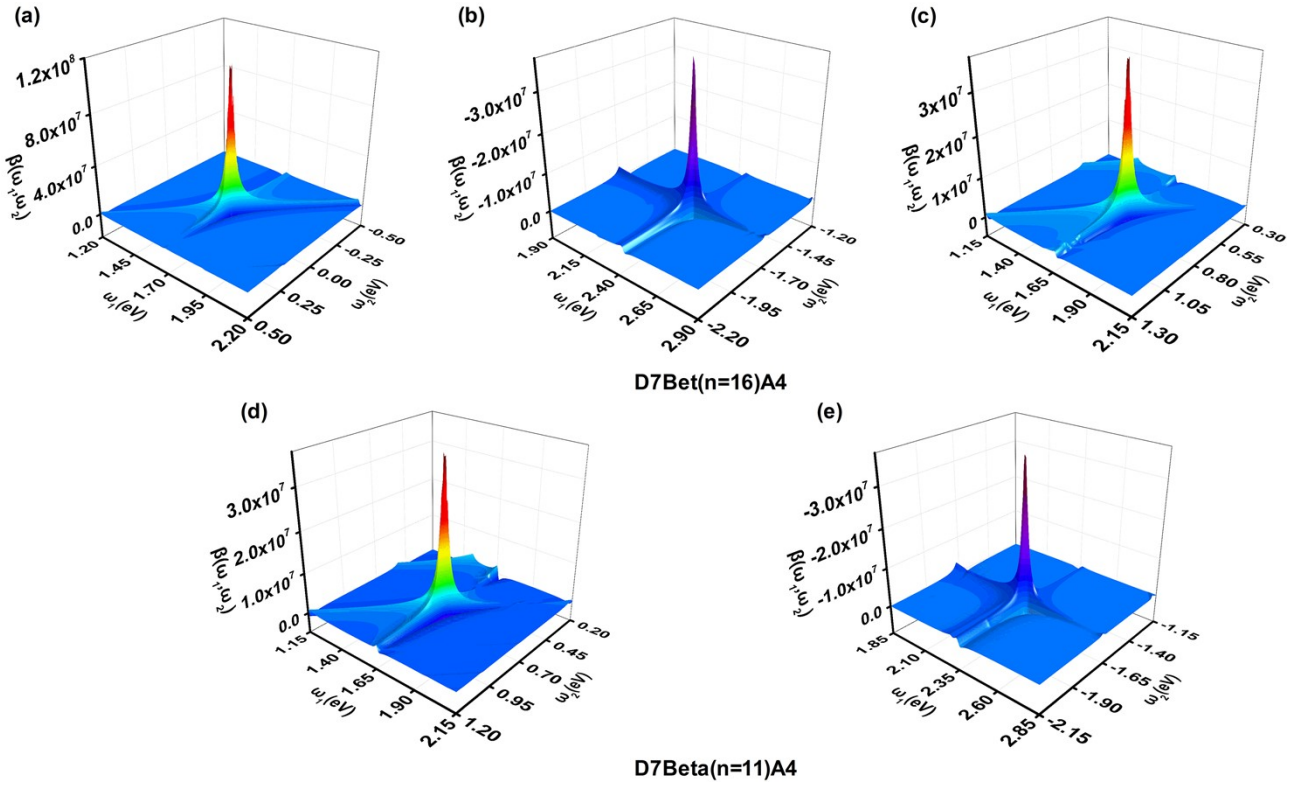

**Fig. S10** Two-dimensional second order NLO spectra of (a/b/c) D7Bet(n=16)A4 and (d/e) D7Beta(n=11)A4 with a step size of 0.005 eV. [(a)  $\omega_1$  scanned from 1.20 eV to 2.20 eV and  $\omega_2$  scanned from  $-0.50$  eV to  $0.50$  eV; (b)  $\omega_1$  scanned from 1.90 eV to 2.90 eV and  $\omega_2$  scanned from  $-2.20$  eV to  $-1.20$  eV; (c)  $\omega_1$  scanned from 1.15 eV to 2.15 eV and  $\omega_2$  scanned from  $0.30$  eV to  $1.30$  eV; (d)  $\omega_1$  scanned from 1.15 eV to 2.15 eV and  $\omega_2$  scanned from  $0.20$  eV to  $1.20$  eV; (e)  $\omega_1$  scanned from 1.85 eV to 2.85 eV and  $\omega_2$  scanned from  $-2.15$  eV to  $-1.15$  eV].

**Table S1** The electronic properties of styrene, different donors (D1 to D8) doped benzene, and different acceptors (A1 to A8) doped ethylene predicted with B3LYP/6-31G(d,p).

| Compounds                                                           | BL<br>(phenyl)  | D <sub>g</sub><br>(B3LYP) | NBO<br>(phenyl)    | NBO<br>(donors)  | Δq    | E <sub>HOMO</sub> | E <sub>LUMO</sub> | E <sub>gap</sub><br>(B3LYP) | IP<br>(donor)    |
|---------------------------------------------------------------------|-----------------|---------------------------|--------------------|------------------|-------|-------------------|-------------------|-----------------------------|------------------|
| styrene (C <sub>8</sub> H <sub>8</sub> )                            | 1.407           | 0.19                      | -0.020             | 0.020            | 0.040 | -0.222            | -0.031            | 5.19                        | 10.38            |
| D1 (C <sub>18</sub> H <sub>21</sub> N <sub>3</sub> )                | 1.406           | 3.07                      | -0.010             | 0.009            | 0.019 | -0.192            | -0.039            | 4.17                        | 7.02             |
| D2 (C <sub>16</sub> H <sub>13</sub> N)                              | 1.406           | 1.98                      | -0.002             | 0.002            | 0.004 | -0.185            | -0.056            | 3.52                        | 6.92             |
| D3 (C <sub>14</sub> H <sub>11</sub> N)                              | 1.407           | 2.30                      | -0.020             | 0.020            | 0.040 | -0.192            | -0.014            | 4.85                        | 7.43             |
| D4 (C <sub>18</sub> H <sub>19</sub> N)                              | 1.406           | 2.47                      | -0.026             | 0.024            | 0.050 | -0.174            | -0.010            | 4.47                        | 6.59             |
| D5 (C <sub>24</sub> H <sub>19</sub> N)                              | 1.406           | 0.36                      | -0.006             | 0.011            | 0.017 | -0.181            | -0.028            | 4.16                        | 6.42             |
| D6 (C <sub>26</sub> H <sub>23</sub> NO <sub>2</sub> )               | 1.406           | 2.60                      | -0.015             | 0.018            | 0.033 | -0.169            | -0.022            | 4.01                        | 5.98             |
| D7 (C <sub>24</sub> H <sub>21</sub> NO <sub>2</sub> S)              | 1.408           | 2.69                      | -0.023             | 0.025            | 0.048 | -0.168            | -0.033            | 3.67                        | 6.01             |
| D8 (C <sub>34</sub> H <sub>38</sub> N <sub>2</sub> )                | 1.406           | 3.71                      | -0.011             | 0.012            | 0.023 | -0.168            | -0.038            | 3.53                        | 5.77             |
| Compounds                                                           | BL<br>(ethenyl) | D <sub>g</sub><br>(B3LYP) | NBO<br>(acceptors) | NBO<br>(ethenyl) | Δq    | E <sub>HOMO</sub> | E <sub>LUMO</sub> | E <sub>gap</sub><br>(B3LYP) | EA<br>(acceptor) |
| styrene (C <sub>8</sub> H <sub>8</sub> )                            | 1.338           | 0.19                      | -0.020             | 0.020            | 0.040 | -0.222            | -0.031            | 5.19                        | -2.28            |
| A1 (C <sub>12</sub> H <sub>9</sub> NO <sub>2</sub> )                | 1.342           | 5.01                      | -0.107             | 0.059            | 0.166 | -0.215            | -0.114            | 2.73                        | 1.31             |
| A2 (C <sub>10</sub> H <sub>4</sub> N <sub>4</sub> )                 | 1.338           | 2.57                      | -0.128             | 0.127            | 0.255 | -0.290            | -0.165            | 3.40                        | 2.87             |
| A3 (C <sub>15</sub> H <sub>9</sub> N <sub>3</sub> )                 | 1.345           | 9.67                      | -0.100             | 0.100            | 0.200 | -0.254            | -0.123            | 3.58                        | 1.64             |
| A4 (C <sub>14</sub> H <sub>11</sub> N <sub>3</sub> O)               | 1.344           | 12.29                     | -0.075             | 0.073            | 0.148 | -0.242            | -0.128            | 3.08                        | 1.80             |
| A5 (C <sub>11</sub> H <sub>3</sub> F <sub>4</sub> N <sub>3</sub> )  | 1.342           | 4.93                      | -0.618             | 0.135            | 0.753 | -0.278            | -0.129            | 4.08                        | 1.89             |
| A6 (C <sub>14</sub> H <sub>7</sub> NO <sub>5</sub> )                | 1.338           | 3.23                      | -0.067             | 0.067            | 0.134 | -0.256            | -0.133            | 3.35                        | 1.95             |
| A7 (C <sub>12</sub> H <sub>9</sub> N <sub>3</sub> O <sub>2</sub> )  | 1.338           | 5.50                      | -0.057             | 0.058            | 0.115 | -0.244            | -0.102            | 3.87                        | 1.02             |
| A8 (C <sub>11</sub> H <sub>6</sub> N <sub>4</sub> O <sub>2</sub> S) | 1.340           | 5.49                      | -0.080             | 0.082            | 0.162 | -0.244            | -0.128            | 3.17                        | 1.77             |

BL is the bond length (in Å); D<sub>g</sub> is the ground state dipole moment (in Debye); NBO is the charge of natural bond orbital analysis; Δq is the difference between positive and negative charge; E<sub>gap</sub> is the energy gap between the highest occupied molecular orbital (E<sub>HOMO</sub>) and the lowest unoccupied molecular orbital (E<sub>LUMO</sub>) (in eV); EA is the electronic affinity. IP is the ionization potential.

**Table S2** The electronic properties [predicted with B3LYP/6-31G(d,p)], static first hyperpolarizability per heavy atom ( $\langle\beta_0\rangle/N$ , N is the numbers of heavy atoms) and  $\beta_{\text{tot}}/N$  of D8(Baz/Baz(r))A4, D7(Baz/Baz(r))A4 and D7Bb(n)A4 predicted with using TD-CAM-B3LYP/6-31++G(d,p)-SOS.

| Compounds               |                   | $\Delta E_{\text{OS-CS}}$ | $\Delta E_{\text{T-CS}}$ | $\langle S^2 \rangle$ | LVF   | $E_{\text{gap}}$ | $D_g$ | $\langle\beta_0\rangle/N$ | $\beta_{\text{tot}}/N$ |
|-------------------------|-------------------|---------------------------|--------------------------|-----------------------|-------|------------------|-------|---------------------------|------------------------|
| <b>D8(Baz/Baz(r))A4</b> | D8A4              | 0.00                      | 26.14                    | 0.00                  | 6.53  | 2.02             | 19.60 | -28.27                    | 29.93                  |
|                         | D8Baz(r)A4        | 0.00                      | 26.50                    | 0.00                  | 5.93  | 1.66             | 22.74 | -41.41                    | 43.46                  |
|                         | D8BazA4           | 0.00                      | 21.67                    | 0.00                  | 5.77  | 1.45             | 21.08 | -70.39                    | 72.07                  |
| <b>D7(Baz/Baz(r))A4</b> | D7A4              | 0.00                      | 26.75                    | 0.00                  | 12.26 | 2.37             | 21.80 | -12.09                    | 12.48                  |
|                         | D7Baz(r)A4        | 0.00                      | 24.88                    | 0.00                  | 5.94  | 1.99             | 26.11 | -27.74                    | 29.20                  |
|                         | D7BazA4           | 0.00                      | 20.17                    | 0.00                  | 4.56  | 1.68             | 23.61 | -61.36                    | 64.22                  |
| <b>D7Bb(n)A4</b>        | D7Bet(n=16)A4     | 0.00                      | 5.16                     | 0.00                  | 2.11  | 1.06             | 41.09 | -437.22                   | 440.28                 |
|                         | D7Beta(n=11)A4    | 0.00                      | 7.54                     | 0.00                  | 2.42  | 1.01             | 35.66 | -453.92                   | 460.77                 |
|                         | D7Beta(r)(n=11)A4 | 0.00                      | 8.69                     | 0.00                  | 1.98  | 1.14             | 39.27 | -338.39                   | 342.26                 |
|                         | D7Baet(n=11)A4    | 0.00                      | 7.81                     | 0.00                  | 1.90  | 1.16             | 33.24 | -254.71                   | 258.43                 |
|                         | D7Ba(r)et(n=11)A4 | 0.00                      | 8.10                     | 0.00                  | 2.04  | 1.28             | 37.26 | -257.13                   | 258.79                 |
|                         | D7Baze(n=4)A4     | 0.00                      | 12.41                    | 0.00                  | 3.25  | 0.94             | 28.91 | -381.34                   | 397.10                 |
|                         | D7Bst(n=13)A4     | 0.00                      | 7.66                     | 0.00                  | 2.04  | 1.13             | 32.46 | -259.58                   | 266.19                 |

$\Delta E_{\text{OS-CS}}$  and  $\Delta E_{\text{T-CS}}$  (in kcal/mol): the relative electronic energy differences between open-shell singlet (OS) or triplet (T) and closed-shell singlet (CS) (CS is taken as reference);  $\langle S^2 \rangle$ : the spin contamination of open-shell singlet obtained at UB3LYP/6-31G(d,p) level; LVF (in  $\text{cm}^{-1}$ ): the lowest vibrational frequency;  $E_{\text{gap}}$  (in eV): the energy gap between the highest occupied molecular orbital and the lowest unoccupied molecular orbital;  $D_g$  (in Debye): the ground state dipole moment.  $\langle\beta_0\rangle/N$  (in  $10^{-30}$  esu): static first hyperpolarizability per heavy atom, N is the numbers of heavy atoms.  $\beta_{\text{tot}}/N$  is obtained through  $[(\beta_{\text{xxx}}+\beta_{\text{xyy}}+\beta_{\text{xzz}})^2+(\beta_{\text{yyy}}+\beta_{\text{yzz}}+\beta_{\text{yxx}})^2+(\beta_{\text{zzz}}+\beta_{\text{zxx}}+\beta_{\text{zyy}})^2]^{1/2}$ .

**Table S3** The electronic properties of DaAc, DaBaz(r)Ac and DaBazAc series of molecules predicted with B3LYP/6-31G(d,p).

| Compounds  | $D_g$ | $E_{\text{gap}}$ | LVF   | $\Delta E_{\text{OS-CS}}$ | $\Delta E_{\text{T-CS}}$ | $\langle S^2 \rangle$ | Compounds  | $D_g$ | $E_{\text{gap}}$ | LVF   | $\Delta E_{\text{OS-CS}}$ | $\Delta E_{\text{T-CS}}$ | $\langle S^2 \rangle$ |
|------------|-------|------------------|-------|---------------------------|--------------------------|-----------------------|------------|-------|------------------|-------|---------------------------|--------------------------|-----------------------|
| D7A3       | 17.31 | 2.61             | 8.92  | 0.00                      | 30.91                    | 0.00                  | D4A5       | 11.52 | 2.99             | 16.88 | 0.00                      | 35.39                    | 0.00                  |
| D7Baz(r)A3 | 21.12 | 2.08             | 7.56  | 0.00                      | 27.15                    | 0.00                  | D4Baz(r)A5 | 16.84 | 2.29             | 10.30 | 0.00                      | 30.85                    | 0.00                  |
| D7BazA3    | 18.90 | 1.79             | 6.72  | 0.00                      | 21.76                    | 0.00                  | D4BazA5    | 13.99 | 1.99             | 5.66  | 0.00                      | 25.59                    | 0.00                  |
| D7A2       | 13.30 | 2.07             | 11.58 | 0.00                      | 22.15                    | 0.00                  | D8A2       | 12.35 | 1.25             | 12.17 | 0.00                      | 15.83                    | 0.00                  |
| D7Baz(r)A2 | 18.80 | 1.70             | 7.66  | 0.00                      | 24.28                    | 0.00                  | D8Baz(r)A2 | 16.87 | 1.25             | 7.05  | 0.00                      | 25.49                    | 0.00                  |
| D7BazA2    | 15.09 | 1.16             | 8.46  | 0.00                      | 18.75                    | 0.00                  | D8BazA2    | 13.96 | 0.88             | 7.25  | 0.00                      | 16.27                    | 0.00                  |
| D7A5       | 13.83 | 2.78             | 9.34  | 0.00                      | 31.95                    | 0.00                  | D8A3       | 14.93 | 2.16             | 8.44  | 0.00                      | 27.07                    | 0.00                  |
| D7Baz(r)A5 | 19.61 | 2.13             | 6.62  | 0.00                      | 28.11                    | 0.00                  | D8Baz(r)A3 | 17.54 | 1.76             | 8.49  | 0.00                      | 29.06                    | 0.00                  |
| D7BazA5    | 15.41 | 1.82             | 6.94  | 0.00                      | 23.05                    | 0.00                  | D8BazA3    | 15.93 | 1.57             | 5.65  | 0.00                      | 23.25                    | 0.00                  |
| D8A5       | 13.45 | 2.19             | 6.87  | 0.00                      | 27.87                    | 0.00                  | D6A2       | 10.20 | 1.60             | 14.17 | 0.00                      | 21.87                    | 0.00                  |
| D8Baz(r)A5 | 17.86 | 1.74             | 5.21  | 0.00                      | 30.49                    | 0.00                  | D6Baz(r)A2 | 15.68 | 1.51             | 9.29  | 0.00                      | 25.97                    | 0.00                  |
| D8BazA5    | 14.28 | 1.59             | 7.26  | 0.00                      | 24.68                    | 0.00                  | D6BazA2    | 12.70 | 1.08             | 7.80  | 0.00                      | 20.93                    | 0.00                  |

**Table S4** The static first hyperpolarizability ( $\langle\beta_0\rangle$ , in  $10^{-30}$  esu), and the  $\langle\beta_0\rangle/N$  (N is the numbers of heavy atoms) of DaAc, DaBaz(r)Ac and DaBazAc series of molecules predicted with using TD-CAM-B3LYP/6-31++G(d,p)-SOS and CAM-B3LYP/6-31++G(d,p)-CPKS (in brackets), respectively.

| Compounds  | $\langle\beta_0\rangle$ | $\langle\beta_0\rangle/N$ | Compounds  | $\langle\beta_0\rangle$ | $\langle\beta_0\rangle/N$ | Compounds  | $\langle\beta_0\rangle$ | $\langle\beta_0\rangle/N$ |
|------------|-------------------------|---------------------------|------------|-------------------------|---------------------------|------------|-------------------------|---------------------------|
| D7A3       | -253.62<br>(171.84)     | -6.67<br>(4.52)           | D8A4       | -1300.31<br>(604.32)    | -28.27<br>(13.14)         | D4A5       | -143.95<br>(58.69)      | -4.96<br>(2.02)           |
| D7Baz(r)A3 | -1083.80<br>(692.89)    | -22.58<br>(14.44)         | D8Baz(r)A4 | -2318.99<br>(826.45)    | -41.41<br>(14.76)         | D4Baz(r)A5 | -787.49<br>(329.74)     | -20.19<br>(8.45)          |
| D7BazA3    | -2001.68<br>(1139.16)   | -41.70<br>(23.73)         | D8BazA4    | -3941.89<br>(1627.32)   | -70.39<br>(29.06)         | D4BazA5    | -1161.22<br>(525.67)    | -29.77<br>(13.48)         |
| D7A2       | -288.71<br>(126.63)     | -8.49<br>(3.72)           | D8A2       | -1107.13<br>(458.99)    | -26.36<br>(10.93)         | D7A4       | -459.49<br>(284.96)     | -12.09<br>(7.50)          |
| D7Baz(r)A2 | -1567.34<br>(624.91)    | -35.62<br>(14.20)         | D8Baz(r)A2 | -2534.99<br>(676.68)    | -48.75<br>(13.01)         | D7Baz(r)A4 | -1331.47<br>(914.58)    | -27.74<br>(19.05)         |
| D7BazA2    | -2444.51<br>(1072.44)   | -55.56<br>(24.37)         | D8BazA2    | —                       | —                         | D7BazA4    | -2945.31<br>(1567.86)   | -61.36<br>(32.66)         |
| D7A5       | -180.01<br>(93.82)      | -4.74<br>(2.47)           | D8A3       | -838.99<br>(433.95)     | -18.24<br>(9.43)          | D8A5       | -755.85<br>(310.18)     | -16.43<br>(6.74)          |
| D7Baz(r)A5 | -1005.58<br>(545.24)    | -20.95<br>(11.36)         | D8Baz(r)A3 | -1844.29<br>(678.70)    | -32.93<br>(12.12)         | D8Baz(r)A5 | -1957.93<br>(636.52)    | -34.96<br>(11.37)         |
| D7BazA5    | -1717.46<br>(802.45)    | -35.78<br>(16.72)         | D8BazA3    | -2716.70<br>(1220.38)   | -48.51<br>(21.79)         | D8BazA5    | -2434.36<br>(866.06)    | -43.47<br>(15.47)         |
| D6A2       | -505.12<br>(218.72)     | -14.43<br>(6.25)          | D6Baz(r)A2 | -1578.57<br>(531.15)    | -35.08<br>(11.80)         | D6BazA2    | -2090.11<br>(876.69)    | -46.45<br>(19.48)         |

**Table S5** The electronic properties [predicted with B3LYP/6-31G(d,p)] and static first hyperpolarizability ( $\langle\beta_0\rangle$ ) ( $\times 10^{-30}$  esu) [predicted with TD-CAM-B3LYP/6-31++G(d,p)-SOS] of D7Bb(n)A4 series of molecules.

| Compounds                                                                        | $\Delta E_{OS-CS}$ | $\Delta E_{T-CS}$ | $\langle S^2 \rangle$ | $E_{gap}$   | $D_g$ | $\langle\beta_0\rangle(\langle\beta_0\rangle/N)$<br>(TDDFT/SOS) |
|----------------------------------------------------------------------------------|--------------------|-------------------|-----------------------|-------------|-------|-----------------------------------------------------------------|
| D7Bet(n=1)A4 (C <sub>32</sub> H <sub>26</sub> N <sub>4</sub> O <sub>3</sub> S)   | 0.00               | 23.07             | 0.00                  | 2.14 (4.06) | 24.09 | -1025.01 (-25.63)                                               |
| D7Bet(n=2)A4 (C <sub>34</sub> H <sub>28</sub> N <sub>4</sub> O <sub>3</sub> S)   | 0.00               | 20.14             | 0.00                  | 1.96 (3.82) | 26.14 | -1893.80 (-45.09)                                               |
| D7Bet(n=3)A4 (C <sub>36</sub> H <sub>30</sub> N <sub>4</sub> O <sub>3</sub> S)   | 0.00               | 17.79             | 0.00                  | 1.81 (3.62) | 28.00 | -3073.76 (-69.86)                                               |
| D7Bet(n=4)A4 (C <sub>38</sub> H <sub>32</sub> N <sub>4</sub> O <sub>3</sub> S)   | 0.00               | 15.87             | 0.00                  | 1.69 (3.46) | 29.69 | -4574.07 (-99.44)                                               |
| D7Bet(n=5)A4 (C <sub>40</sub> H <sub>34</sub> N <sub>4</sub> O <sub>3</sub> S)   | 0.00               | 14.24             | 0.00                  | 1.60 (3.33) | 31.26 | -6314.93 (-131.56)                                              |
| D7Bet(n=6)A4 (C <sub>42</sub> H <sub>36</sub> N <sub>4</sub> O <sub>3</sub> S)   | 0.00               | 12.85             | 0.00                  | 1.51 (3.22) | 32.69 | -8289.19 (-165.78)                                              |
| D7Bet(n=7)A4 (C <sub>44</sub> H <sub>38</sub> N <sub>4</sub> O <sub>3</sub> S)   | 0.00               | 11.65             | 0.00                  | 1.44 (3.13) | 34.00 | -10459.80 (-201.15)                                             |
| D7Bet(n=8)A4 (C <sub>46</sub> H <sub>40</sub> N <sub>4</sub> O <sub>3</sub> S)   | 0.00               | 10.60             | 0.00                  | 1.38 (3.05) | 35.18 | -12764.50 (-236.38)                                             |
| D7Bet(n=9)A4 (C <sub>48</sub> H <sub>42</sub> N <sub>4</sub> O <sub>3</sub> S)   | 0.00               | 9.68              | 0.00                  | 1.32 (2.99) | 36.25 | -15141.20 (-270.38)                                             |
| D7Bet(n=10)A4 (C <sub>50</sub> H <sub>44</sub> N <sub>4</sub> O <sub>3</sub> S)  | 0.00               | 8.85              | 0.00                  | 1.27 (2.93) | 37.21 | -17607.60 (-303.58)                                             |
| D7Bet(n=11)A4 (C <sub>52</sub> H <sub>46</sub> N <sub>4</sub> O <sub>3</sub> S)  | 0.00               | 8.10              | 0.00                  | 1.23 (2.88) | 38.06 | -20090.80 (-334.85)                                             |
| D7Bet(n=12)A4 (C <sub>54</sub> H <sub>48</sub> N <sub>4</sub> O <sub>3</sub> S)  | 0.00               | 7.41              | 0.00                  | 1.19 (2.83) | 38.83 | -22540.40 (-363.55)                                             |
| D7Bet(n=13)A4 (C <sub>56</sub> H <sub>50</sub> N <sub>4</sub> O <sub>3</sub> S)  | 0.00               | 6.79              | 0.00                  | 1.15 (2.79) | 39.50 | -24844.40 (-388.19)                                             |
| D7Bet(n=14)A4 (C <sub>58</sub> H <sub>52</sub> N <sub>4</sub> O <sub>3</sub> S)  | 0.00               | 6.21              | 0.00                  | 1.12 (2.76) | 40.10 | -26986.20 (-408.88)                                             |
| D7Bet(n=15)A4 (C <sub>60</sub> H <sub>54</sub> N <sub>4</sub> O <sub>3</sub> S)  | 0.00               | 5.67              | 0.00                  | 1.09 (2.73) | 40.63 | -28903.70 (-425.05)                                             |
| D7Bet(n=16)A4 (C <sub>62</sub> H <sub>56</sub> N <sub>4</sub> O <sub>3</sub> S)  | 0.00               | 5.16              | 0.00                  | 1.06 (2.70) | 41.09 | -30605.60 (-437.22)                                             |
| D7Beta(n=1)A4 (C <sub>42</sub> H <sub>32</sub> N <sub>4</sub> O <sub>3</sub> S)  | 0.00               | 18.03             | 0.00                  | 1.55 (3.24) | 25.36 | -3715.15 (-74.30)                                               |
| D7Beta(n=2)A4 (C <sub>44</sub> H <sub>34</sub> N <sub>4</sub> O <sub>3</sub> S)  | 0.00               | 16.59             | 0.00                  | 1.46 (3.11) | 26.97 | -6087.83 (-117.07)                                              |
| D7Beta(n=3)A4 (C <sub>46</sub> H <sub>36</sub> N <sub>4</sub> O <sub>3</sub> S)  | 0.00               | 15.19             | 0.00                  | 1.37 (3.00) | 28.40 | -8616.26 (-159.56)                                              |
| D7Beta(n=4)A4 (C <sub>48</sub> H <sub>38</sub> N <sub>4</sub> O <sub>3</sub> S)  | 0.00               | 13.91             | 0.00                  | 1.30 (2.91) | 29.69 | -11275.50 (-201.35)                                             |
| D7Beta(n=5)A4 (C <sub>50</sub> H <sub>40</sub> N <sub>4</sub> O <sub>3</sub> S)  | 0.00               | 12.75             | 0.00                  | 1.24 (2.83) | 30.85 | -14020.60 (-241.73)                                             |
| D7Beta(n=6)A4 (C <sub>52</sub> H <sub>42</sub> N <sub>4</sub> O <sub>3</sub> S)  | 0.00               | 11.69             | 0.00                  | 1.19 (2.77) | 31.88 | -16816.80 (-280.28)                                             |
| D7Beta(n=7)A4 (C <sub>54</sub> H <sub>44</sub> N <sub>4</sub> O <sub>3</sub> S)  | 0.00               | 10.73             | 0.00                  | 1.14 (2.72) | 32.82 | -19597.90 (-316.10)                                             |
| D7Beta(n=8)A4 (C <sub>56</sub> H <sub>46</sub> N <sub>4</sub> O <sub>3</sub> S)  | 0.00               | 9.85              | 0.00                  | 1.10 (2.67) | 33.65 | -22463.90 (-351.00)                                             |
| D7Beta(n=9)A4 (C <sub>58</sub> H <sub>48</sub> N <sub>4</sub> O <sub>3</sub> S)  | 0.00               | 9.04              | 0.00                  | 1.06 (2.63) | 34.40 | -25895.30 (-392.35)                                             |
| D7Beta(n=10)A4 (C <sub>60</sub> H <sub>50</sub> N <sub>4</sub> O <sub>3</sub> S) | 0.00               | 8.22              | 0.00                  | 1.04 (2.61) | 35.07 | -29262.60 (-430.33)                                             |
| D7Beta(n=11)A4 (C <sub>62</sub> H <sub>52</sub> N <sub>4</sub> O <sub>3</sub> S) | 0.00               | 7.54              | 0.00                  | 1.01 (2.58) | 35.66 | -31774.60 (-453.92)                                             |
| D7Baze(n=4)A4 (C <sub>62</sub> H <sub>48</sub> N <sub>4</sub> O <sub>3</sub> S)  | 0.00               | 12.41             | 0.00                  | 0.94 (2.52) | 28.91 | -26694.10 (-381.34)                                             |
| D7Bst(n=13)A4 (C <sub>62</sub> H <sub>54</sub> N <sub>4</sub> O <sub>3</sub> S)  | 0.00               | 7.66              | 0.00                  | 1.13 (2.74) | 32.46 | -18170.70 (-259.58)                                             |

**Table S6** Major electronic excitations with transitional nature of D8(Baz/Baz(r))A4, D7(Baz/Baz(r))A4, Exp, BAY1 and D7Bb(n)A4 series of molecules.  $f$  is the oscillator strength in a.u. unit;  $E_t$  is the transition energy in eV (nm) unit;  $\langle\beta_0\rangle_{\text{con}}$  (contribution value to  $\langle\beta_0\rangle$ ) and  $\langle\beta_0\rangle_{\text{total}}$  are in  $10^{-30}$  esu unit.

| Compounds                                                                                                | $f$  | $E_t$           | Transition                     | Transition nature                          | $\langle\beta_0\rangle_{\text{con}}$ | $\langle\beta_0\rangle_{\text{total}}$ |
|----------------------------------------------------------------------------------------------------------|------|-----------------|--------------------------------|--------------------------------------------|--------------------------------------|----------------------------------------|
| D8A4<br>(C <sub>40</sub> H <sub>41</sub> N <sub>5</sub> O)                                               | 1.50 | 2.45<br>(507.0) | S <sub>0</sub> →S <sub>1</sub> | H→L 83.36%                                 | -1092.30                             | -1300.31                               |
| D8Baz(r)A4<br>(C <sub>50</sub> H <sub>47</sub> N <sub>5</sub> O)                                         | 2.05 | 2.43<br>(509.4) | S <sub>0</sub> →S <sub>2</sub> | H→L 60.60%<br>H-2→L 19.90%                 | -1921.68                             | -2318.99                               |
| D8BazA4<br>(C <sub>50</sub> H <sub>47</sub> N <sub>5</sub> O)                                            | 1.86 | 2.11<br>(586.5) | S <sub>0</sub> →S <sub>2</sub> | H→L 72.91%<br>H-2→L 16.11%                 | -3366.23                             | -3941.89                               |
| D7A4<br>(C <sub>30</sub> H <sub>24</sub> N <sub>4</sub> O <sub>3</sub> S)                                | 1.64 | 2.53<br>(490.9) | S <sub>0</sub> →S <sub>1</sub> | H→L 94.16%                                 | -477.22                              | -459.49                                |
| D7Baz(r)A4<br>(C <sub>40</sub> H <sub>30</sub> N <sub>4</sub> O <sub>3</sub> S)                          | 2.21 | 2.25<br>(549.9) | S <sub>0</sub> →S <sub>2</sub> | H→L 80.90%                                 | -1287.94                             | -1331.47                               |
| D7BazA4<br>(C <sub>40</sub> H <sub>30</sub> N <sub>4</sub> O <sub>3</sub> S)                             | 1.88 | 2.01<br>(616.3) | S <sub>0</sub> →S <sub>1</sub> | H→L 82.82%                                 | -2667.94                             | -2945.31                               |
| Exp<br>(C <sub>38</sub> H <sub>30</sub> N <sub>4</sub> O <sub>3</sub> S)                                 | 1.97 | 2.24<br>(553.3) | S <sub>0</sub> →S <sub>1</sub> | H→L 74.51%<br>H-1→L 18.48%                 | -1515.73                             | -1594.83                               |
| BAY1<br>(C <sub>86</sub> H <sub>89</sub> F <sub>3</sub> N <sub>6</sub> O <sub>3</sub> SSi <sub>2</sub> ) | 2.42 | 2.03<br>(611.7) | S <sub>0</sub> →S <sub>1</sub> | H→L 71.50%<br>H-1→L 20.90%                 | -3756.03                             | -4114.91                               |
|                                                                                                          | 0.32 | 2.83<br>(438.3) | S <sub>0</sub> →S <sub>2</sub> | H-1→L 70.0%<br>H→L 19.40%                  | -226.54                              |                                        |
| D7Bet(n=16)A4<br>(C <sub>62</sub> H <sub>56</sub> N <sub>4</sub> O <sub>3</sub> S)                       | 8.35 | 1.68<br>(738.8) | S <sub>0</sub> →S <sub>1</sub> | H→L 35.80%<br>H-1→L 27.42%<br>H→L+1 17.84% | -25772.40                            | -30605.60                              |
|                                                                                                          | 0.93 | 2.44<br>(508.5) | S <sub>0</sub> →S <sub>3</sub> | H→L 56.76%<br>H→L+1 11.66%                 | -4001.80                             |                                        |
| D7Beta(n=11)A4<br>(C <sub>62</sub> H <sub>52</sub> N <sub>4</sub> O <sub>3</sub> S)                      | 5.73 | 1.66<br>(748.2) | S <sub>0</sub> →S <sub>1</sub> | H→L 46.43%<br>H-1→L 23.90%<br>H→L+1 14.56% | -25017.00                            | -31774.60                              |
|                                                                                                          | 1.16 | 2.35<br>(527.3) | S <sub>0</sub> →S <sub>4</sub> | H→L 49.20%<br>H→L+1 16.97%<br>H-1→L 12.42% | -5026.90                             |                                        |
| D7Beta(r)(n=11)A4<br>(C <sub>62</sub> H <sub>52</sub> N <sub>4</sub> O <sub>3</sub> S)                   | 6.72 | 1.74<br>(711.5) | S <sub>0</sub> →S <sub>1</sub> | H→L 44.40%<br>H-1→L 22.40%<br>H→L+1 16.70% | -19819.20                            | -23687.40                              |
|                                                                                                          | 1.03 | 2.53<br>(490.6) | S <sub>0</sub> →S <sub>4</sub> | H→L 48.30%<br>H→L+1 18.80%                 | -3203.90                             |                                        |
| D7Baet(n=11)A4<br>(C <sub>62</sub> H <sub>52</sub> N <sub>4</sub> O <sub>3</sub> S)                      | 7.41 | 1.78<br>(695.3) | S <sub>0</sub> →S <sub>1</sub> | H-1→L 37.50%<br>H→L 30.30%<br>H→L+1 15.70% | -15427.20                            | -17830.00                              |
|                                                                                                          | 0.49 | 2.58<br>(480.8) | S <sub>0</sub> →S <sub>4</sub> | H→L 60.50%<br>H→L+1 10.40%                 | -1770.70                             |                                        |
| D7Ba(r)et(n=11)A4<br>(C <sub>62</sub> H <sub>52</sub> N <sub>4</sub> O <sub>3</sub> S)                   | 7.22 | 1.76<br>(704.4) | S <sub>0</sub> →S <sub>1</sub> | H→L 54.90%<br>H-1→L 15.70%<br>H→L+1 14.80% | -16213.90                            | -17999.10                              |
|                                                                                                          | 0.60 | 2.66<br>(465.8) | S <sub>0</sub> →S <sub>4</sub> | H→L 34.00%<br>H-2→L 21.10%<br>H-1→L 16.90% | -1257.6                              |                                        |
| D7Baze(n=4)A4<br>(C <sub>62</sub> H <sub>48</sub> N <sub>4</sub> O <sub>3</sub> S)                       | 3.89 | 1.72<br>(720.1) | S <sub>0</sub> →S <sub>1</sub> | H→L 57.40%<br>H-1→L 14.90%<br>H→L+1 13.10% | -19997.90                            | -26694.10                              |
|                                                                                                          | 1.37 | 2.33<br>(531.2) | S <sub>0</sub> →S <sub>4</sub> | H→L 39.80%<br>H-1→L 17.20%                 | -4999.90                             |                                        |

| Compounds                                      | $f$  | $E_t$           | Transition                   | Transition nature          | $\langle\beta_0\rangle_{con}$ | $\langle\beta_0\rangle_{total}$ |
|------------------------------------------------|------|-----------------|------------------------------|----------------------------|-------------------------------|---------------------------------|
| D7Bst( $n=13$ )A4<br>( $C_{62}H_{54}N_4O_3S$ ) | 7.60 | 1.88<br>(659.8) | $S_0 \rightarrow S_1$        | H $\rightarrow$ L+1 12.70% | -15354.40                     | -18170.70                       |
|                                                |      |                 |                              | H-3 $\rightarrow$ L 12.70% |                               |                                 |
|                                                |      |                 |                              | H $\rightarrow$ L+1 33.10% |                               |                                 |
|                                                | 0.54 | 2.62<br>(472.9) | $S_0 \rightarrow S_3$        | H $\rightarrow$ L 29.70%   | -1897.40                      |                                 |
|                                                |      |                 |                              | H-1 $\rightarrow$ L 16.10% |                               |                                 |
|                                                |      |                 |                              | H $\rightarrow$ L 55.70%   |                               |                                 |
|                                                |      |                 | H-1 $\rightarrow$ L 13.00%   |                            |                               |                                 |
|                                                |      |                 | H-1 $\rightarrow$ L+1 10.10% |                            |                               |                                 |

**Table S7** Predicted major  $\beta_{ijk}$  [ $i, j, k \in (x, y, z)$ ] ( $\times 10^{-30}$  esu) of D8(Baz/Baz(r))A4, D7(Baz/Baz(r))A4 and D7Bb(n)A4 series of molecules, and properties of the related states with important contributions to the  $\beta_{ijk}$  according to the SOS model.  $E_t$  is the transition energy in eV unit;  $m$  is the state number ( $m=0$  is the ground state,  $m>0$  is the  $m$ th excited state).

| Compounds<br>( $\langle\beta_{0>$ ) | $\beta_{xxx}$ | State<br>[ $S_m$ ]         | $E_t$ | State dipole moment |       |       | Transition dipole moment |       |       |
|-------------------------------------|---------------|----------------------------|-------|---------------------|-------|-------|--------------------------|-------|-------|
|                                     |               |                            |       | X                   | Y     | Z     | X                        | Y     | Z     |
| D8A4<br>(-1300.31)                  | -1143.08      | $S_0$                      |       | 17.87               | -3.73 | 3.67  |                          |       |       |
|                                     |               | $S_1[S_0 \rightarrow S_1]$ | 2.45  | 35.96               | -0.73 | 3.70  | 12.72                    | 0.74  | 0.63  |
| D8Baz(r)A4<br>(-2318.99)            | 2010.97       | $S_0$                      |       | -20.85              | -1.88 | -7.10 |                          |       |       |
|                                     |               | $S_2[S_0 \rightarrow S_2]$ | 2.43  | -43.95              | -0.94 | -6.38 | 14.86                    | 0.22  | 1.13  |
| D8BazA4<br>(-3941.89)               | -3544.62      | $S_0$                      |       | 17.51               | -4.68 | 4.10  |                          |       |       |
|                                     |               | $S_2[S_0 \rightarrow S_2]$ | 2.11  | 46.75               | -4.04 | 3.94  | 15.23                    | -0.39 | 0.54  |
| D7A4<br>(-459.49)                   | -496.11       | $S_0$                      |       | 20.82               | 4.53  | 2.81  |                          |       |       |
|                                     |               | $S_1[S_0 \rightarrow S_1]$ | 2.53  | 28.73               | 3.62  | 2.46  | 13.08                    | 0.60  | -0.15 |
| D7Baz(r)A4<br>(-1331.47)            | -1346.52      | $S_0$                      |       | 24.35               | 5.21  | 4.71  |                          |       |       |
|                                     |               | $S_2[S_0 \rightarrow S_2]$ | 2.25  | 35.68               | 4.33  | 4.18  | -16.07                   | -0.52 | -0.12 |
| D7BazA4<br>(-2945.31)               | -2817.47      | $S_0$                      |       | 20.29               | 5.38  | 3.52  |                          |       |       |
|                                     |               | $S_1[S_0 \rightarrow S_1]$ | 2.01  | 40.11               | 4.66  | 2.95  | 15.69                    | -0.05 | -0.25 |
| D7Bet(n=16)A4<br>(-30605.60)        | -25991.70     | $S_0$                      |       | 31.49               | 2.46  | 3.48  |                          |       |       |
|                                     |               | $S_1[S_0 \rightarrow S_1]$ | 1.68  | 55.42               | 1.42  | 3.22  | 36.18                    | 1.22  | 0.51  |
|                                     |               | $S_3[S_0 \rightarrow S_3]$ | 2.44  | 133.91              | 1.49  | 3.15  | -9.96                    | -1.09 | -0.36 |
| D7Beta(n=11)A4<br>(-31774.60)       | -25447.90     | $S_0$                      |       | 26.09               | 2.44  | 3.51  |                          |       |       |
|                                     |               | $S_1[S_0 \rightarrow S_1]$ | 1.66  | 58.95               | -0.35 | 2.70  | -30.17                   | 0.16  | 0.01  |
|                                     |               | $S_4[S_0 \rightarrow S_4]$ | 2.35  | 118.73              | 0.00  | 2.61  | 11.37                    | 0.93  | 0.28  |
| D7Beta(r)(n=11)A4<br>(-23687.40)    | -20082.30     | $S_0$                      |       | 31.63               | 2.64  | 4.44  |                          |       |       |
|                                     |               | $S_1[S_0 \rightarrow S_1]$ | 1.74  | 57.38               | 1.66  | 4.10  | -31.83                   | -0.73 | -0.30 |
|                                     |               | $S_4[S_0 \rightarrow S_4]$ | 2.53  | 114.34              | 1.65  | 3.88  | 10.29                    | 1.16  | 0.37  |
| D7Baet(n=11)A4<br>(-17830.00)       | -15660.20     | $S_0$                      |       | 25.81               | 3.79  | 3.33  |                          |       |       |
|                                     |               | $S_1[S_0 \rightarrow S_1]$ | 1.78  | 45.33               | 3.32  | 3.06  | 33.04                    | 1.54  | 0.40  |
|                                     |               | $S_4[S_0 \rightarrow S_4]$ | 2.58  | 127.39              | 3.48  | 2.88  | -7.05                    | -0.70 | -0.22 |
| D7Ba(r)et(n=11)A4<br>(-17999.10)    | 16288.70      | $S_0$                      |       | -31.34              | -3.75 | 2.74  |                          |       |       |
|                                     |               | $S_1[S_0 \rightarrow S_1]$ | 1.76  | -51.44              | -3.80 | 2.57  | -32.78                   | -1.99 | 0.18  |
|                                     |               | $S_4[S_0 \rightarrow S_4]$ | 2.66  | -95.20              | -5.01 | 2.39  | 7.70                     | 0.91  | -0.17 |
| D7Baze(n=4)A4<br>(-26694.10)        | -20874.30     | $S_0$                      |       | 20.00               | 4.73  | 2.60  |                          |       |       |
|                                     |               | $S_1[S_0 \rightarrow S_1]$ | 1.72  | 64.60               | 2.11  | 1.38  | -24.37                   | 0.23  | 0.31  |
|                                     |               | $S_4[S_0 \rightarrow S_4]$ | 2.33  | 98.35               | 2.29  | 1.32  | 12.42                    | 0.26  | -0.11 |
| D7Bst(n=13)A4<br>(-18170.70)        | -15555.00     | $S_0$                      |       | 25.01               | 3.21  | 2.93  |                          |       |       |
|                                     |               | $S_1[S_0 \rightarrow S_1]$ | 1.88  | 47.14               | 2.25  | 2.69  | 32.58                    | 1.48  | 0.43  |
|                                     |               | $S_3[S_0 \rightarrow S_3]$ | 2.62  | 128.66              | 1.58  | 2.36  | 7.37                     | 0.39  | 0.24  |

**(1) D8A4:**



$$\beta_{xxx} [S_0 \rightarrow S_1] = 6 \times \frac{12.72 \times (35.96 - 17.87) \times (-12.72)}{2.45^2} \times \frac{(10^{-18})^3}{(1.602 \times 10^{-12})^2} esu = -1140.01 \times 10^{-30} esu$$

**(2) D8Baz(r)A4:**

$$\beta_{xxx} [S_0 \rightarrow S_2] = 6 \times \frac{14.86 \times [(-43.95) - (-20.85)] \times (-14.86)}{2.43^2} \times \frac{(10^{-18})^3}{(1.602 \times 10^{-12})^2} esu = 2019.59 \times 10^{-30} esu$$

**(3) D8BazA4:**

$$\beta_{xxx} [S_0 \rightarrow S_2] = 6 \times \frac{15.23 \times (46.75 - 17.51) \times (-15.23)}{2.11^2} \times \frac{(10^{-18})^3}{(1.602 \times 10^{-12})^2} esu = -3561.55 \times 10^{-30} esu$$

**(4) D7A4:**

$$\beta_{xxx} [S_0 \rightarrow S_1] = 6 \times \frac{13.08 \times (28.73 - 20.82) \times (-13.08)}{2.53^2} \times \frac{(10^{-18})^3}{(1.602 \times 10^{-12})^2} esu = -494.28 \times 10^{-30} esu$$

**(5) D7Baz(r)A4:**

$$\beta_{xxx} [S_0 \rightarrow S_2] = 6 \times \frac{(-16.07) \times (35.68 - 24.35) \times 16.07}{2.25^2} \times \frac{(10^{-18})^3}{(1.602 \times 10^{-12})^2} esu = -1351.21 \times 10^{-30} esu$$

**(6) D7BazA4:**

$$\beta_{xxx} [S_0 \rightarrow S_1] = 6 \times \frac{15.69 \times (40.11 - 20.29) \times (-15.69)}{2.01^2} \times \frac{(10^{-18})^3}{(1.602 \times 10^{-12})^2} esu = -2823.47 \times 10^{-30} esu$$

**(7) D7Bet(n=16)A4:**

$$\beta_{xxx} [S_0 \rightarrow S_1] = 6 \times \frac{36.18 \times (55.42 - 31.49) \times (-36.18)}{1.68^2} \times \frac{(10^{-18})^3}{(1.602 \times 10^{-12})^2} esu = -25947.02 \times 10^{-30} esu$$

$$\beta_{xxx} [S_0 \rightarrow S_3] = 6 \times \frac{(-9.96) \times (133.91 - 31.49) \times 9.96}{2.44^2} \times \frac{(10^{-18})^3}{(1.602 \times 10^{-12})^2} esu = -3989.79 \times 10^{-30} esu$$

**(8) D7Beta(n=11)A4:**

$$\beta_{xxx} [S_0 \rightarrow S_1] = 6 \times \frac{(-30.17) \times (58.95 - 26.09) \times 30.17}{1.66^2} \times \frac{(10^{-18})^3}{(1.602 \times 10^{-12})^2} esu = -25376.30 \times 10^{-30} esu$$

$$\beta_{xxx} [S_0 \rightarrow S_4] = 6 \times \frac{11.37 \times (118.73 - 26.09) \times (-11.37)}{2.35^2} \times \frac{(10^{-18})^3}{(1.602 \times 10^{-12})^2} esu = -5070.02 \times 10^{-30} esu$$

**(9) D7Beta(r)(n=11)A4:**

$$\beta_{xxx} [S_0 \rightarrow S_1] = 6 \times \frac{(-31.83) \times (57.38 - 31.63) \times 31.83}{1.74^2} \times \frac{(10^{-18})^3}{(1.602 \times 10^{-12})^2} esu = -20145.51 \times 10^{-30} esu$$

$$\beta_{xxx} [S_0 \rightarrow S_4] = 6 \times \frac{10.29 \times (114.34 - 31.63) \times (-10.29)}{2.53^2} \times \frac{(10^{-18})^3}{(1.602 \times 10^{-12})^2} esu = -3198.70 \times 10^{-30} esu$$

**(10) D7Baet(n=11)A4:**

$$\beta_{xxx} [S_0 \rightarrow S_1] = 6 \times \frac{33.04 \times (45.33 - 25.81) \times (-33.04)}{1.78^2} \times \frac{(10^{-18})^3}{(1.602 \times 10^{-12})^2} esu = -15723.39 \times 10^{-30} esu$$

$$\beta_{xxx} [S_0 \rightarrow S_4] = 6 \times \frac{(-7.05) \times (127.39 - 25.81) \times 7.05}{2.58^2} \times \frac{(10^{-18})^3}{(1.602 \times 10^{-12})^2} esu = -1773.26 \times 10^{-30} esu$$

**(11) D7Ba(r)et(n=11)A4:**

$$\beta_{xxx} [S_0 \rightarrow S_1] = 6 \times \frac{(-32.78) \times [(-51.44) - (-31.34)] \times 32.78}{1.76^2} \times \frac{(10^{-18})^3}{(1.602 \times 10^{-12})^2} esu = 16301.02 \times 10^{-30} esu$$

$$\beta_{xxx} [S_0 \rightarrow S_4] = 6 \times \frac{7.70 \times [(-95.20) - (-31.34)] \times (-7.70)}{2.66^2} \times \frac{(10^{-18})^3}{(1.602 \times 10^{-12})^2} esu = 1251.05 \times 10^{-30} esu$$

**(12) D7Baze(n=4)A4:**

$$\beta_{xxx} [S_0 \rightarrow S_1] = 6 \times \frac{(-24.37) \times (64.60 - 20.00) \times 24.37}{1.72^2} \times \frac{(10^{-18})^3}{(1.602 \times 10^{-12})^2} esu = -20932.22 \times 10^{-30} esu$$

$$\beta_{xxx} [S_0 \rightarrow S_4] = 6 \times \frac{12.42 \times (98.35 - 20.00) \times (-12.42)}{2.33^2} \times \frac{(10^{-18})^3}{(1.602 \times 10^{-12})^2} esu = -5204.71 \times 10^{-30} esu$$

**(13) D7Bst(n=13)A4:**

$$\beta_{xxx} [S_0 \rightarrow S_1] = 6 \times \frac{32.58 \times (47.14 - 25.01) \times (-32.58)}{1.88^2} \times \frac{(10^{-18})^3}{(1.602 \times 10^{-12})^2} esu = -15537.96 \times 10^{-30} esu$$

$$\beta_{xxx} [S_0 \rightarrow S_3] = 6 \times \frac{7.37 \times (128.66 - 25.01) \times (-7.37)}{2.62^2} \times \frac{(10^{-18})^3}{(1.602 \times 10^{-12})^2} esu = -1917.47 \times 10^{-30} esu$$

**Table S8** Calculated electronic properties [predicted with B3LYP/6-31G(d,p)] and static first hyperpolarizability ( $\langle\beta_0\rangle$ ) (in  $10^{-30}$  esu) and  $\langle\beta_0\rangle$  per heavy atom ( $\langle\beta_0\rangle/N$ ) [predicted with TD-CAM-B3LYP/6-31++G(d,p)-SOS] for the experimentally and recently reported NLO molecules Exp and BAY1, respectively.

| Compounds                                | $E_{\text{gap}}$ | $D_g$ | $\langle\beta_0\rangle/(\langle\beta_0\rangle/N)$<br>(TDDFT/SOS) |
|------------------------------------------|------------------|-------|------------------------------------------------------------------|
| Exp<br>( $C_{38}H_{30}N_4O_3S$ )         | 1.85             | 21.93 | -1594.83(-34.67)                                                 |
| BAY1<br>( $C_{86}H_{89}F_3N_6O_3SSi_2$ ) | 1.56             | 29.05 | -4114.91(-40.74)                                                 |

$E_{\text{gap}}$ : the energy gap between the highest occupied molecular orbital ( $E_{\text{HOMO}}$ ) and the lowest unoccupied molecular orbital ( $E_{\text{LUMO}}$ ) (in eV);  $D_g$ : the ground state dipole moment (in Debye).

Cartesian coordinates of all studied compounds optimized with B3LYP/6-31G(d,p)

| D7A3 |           |           | D7Baz(r)A3 |   |           |           |           |
|------|-----------|-----------|------------|---|-----------|-----------|-----------|
| N    | 2.705283  | -0.092018 | -0.061696  | N | 5.828741  | -0.106065 | -0.045063 |
| C    | 3.772732  | -1.023601 | 0.173725   | C | 6.921868  | -0.995594 | 0.214076  |
| C    | 3.724876  | -1.910651 | 1.260395   | C | 6.831458  | -1.9739   | 1.217675  |
| C    | 4.889154  | -1.029862 | -0.663713  | C | 8.108001  | -0.877617 | -0.513489 |
| C    | 4.769187  | -2.794185 | 1.488472   | C | 7.901397  | -2.8185   | 1.471824  |
| H    | 2.865173  | -1.904838 | 1.922265   | H | 5.91795   | -2.068058 | 1.795152  |
| C    | 5.950477  | -1.905462 | -0.431107  | C | 9.194783  | -1.713449 | -0.251075 |
| H    | 4.933386  | -0.34179  | -1.501524  | H | 8.186713  | -0.121488 | -1.287586 |
| C    | 5.89269   | -2.798846 | 0.645968   | C | 9.094571  | -2.69491  | 0.742052  |
| H    | 4.745099  | -3.485287 | 2.324071   | H | 7.843584  | -3.57678  | 2.245369  |
| H    | 6.80473   | -1.886674 | -1.096656  | H | 10.102194 | -1.595272 | -0.83062  |
| C    | 3.031862  | 1.300176  | -0.187145  | C | 6.092284  | 1.299377  | -0.141535 |
| C    | 2.663714  | 2.021446  | -1.325009  | C | 5.700654  | 2.025975  | -1.268539 |
| C    | 3.754631  | 1.942823  | 0.829673   | C | 6.769263  | 1.959006  | 0.896383  |
| C    | 2.986696  | 3.373896  | -1.446753  | C | 5.955646  | 3.395374  | -1.359862 |
| H    | 2.120848  | 1.525731  | -2.123088  | H | 5.190676  | 1.519537  | -2.081519 |
| C    | 4.092565  | 3.281527  | 0.708437   | C | 7.041731  | 3.31513   | 0.804805  |
| H    | 4.049917  | 1.383646  | 1.71134    | H | 7.080002  | 1.398843  | 1.772127  |
| C    | 3.706589  | 4.01096   | -0.428328  | C | 6.632165  | 4.047185  | -0.321535 |
| H    | 2.685342  | 3.909689  | -2.338365  | H | 5.636852  | 3.933311  | -2.244254 |
| H    | 4.648875  | 3.792207  | 1.486961   | H | 7.562111  | 3.837291  | 1.600465  |
| C    | 1.410574  | -0.533089 | -0.151055  | C | 4.555188  | -0.604659 | -0.215132 |
| C    | 0.97191   | -1.841374 | -0.376536  | C | 4.181795  | -1.885861 | -0.595947 |
| S    | 0.055145  | 0.548839  | 0.090422   | S | 3.1417    | 0.374875  | 0.150862  |
| C    | -0.41894  | -1.971325 | -0.360636  | C | 2.787076  | -2.071999 | -0.60094  |
| H    | 1.653522  | -2.662108 | -0.554604  | H | 4.897645  | -2.648119 | -0.87375  |
| C    | -1.109799 | -0.777775 | -0.132816  | C | 2.043226  | -0.957536 | -0.243212 |
| H    | -0.924098 | -2.912302 | -0.533253  | H | 2.331958  | -3.001305 | -0.921666 |
| O    | 6.863893  | -3.698075 | 0.96165    | O | 10.085898 | -3.567466 | 1.076944  |
| O    | 4.081636  | 5.318504  | -0.444422  | O | 6.941276  | 5.373296  | -0.307595 |
| C    | 8.024899  | -3.75384  | 0.143945   | C | 11.315732 | -3.493322 | 0.370394  |
| H    | 7.776845  | -4.019668 | -0.891099  | H | 11.178164 | -3.685601 | -0.701092 |
| H    | 8.569413  | -2.801368 | 0.151583   | H | 11.799112 | -2.516981 | 0.501747  |
| H    | 8.656346  | -4.532272 | 0.573262   | H | 11.953258 | -4.269417 | 0.7953    |
| C    | 3.720274  | 6.112438  | -1.566659  | C | 6.550399  | 6.169227  | -1.417465 |
| H    | 2.631291  | 6.168865  | -1.686591  | H | 5.461104  | 6.171552  | -1.548883 |
| H    | 4.112058  | 7.110067  | -1.366093  | H | 6.887362  | 7.181962  | -1.193744 |
| H    | 4.166203  | 5.728407  | -2.492531  | H | 7.024567  | 5.827938  | -2.346226 |
| C    | -2.48515  | -0.45445  | -0.09044   | C | 0.599241  | -0.796845 | -0.20878  |
| C    | -3.604251 | -1.268229 | -0.215333  | C | 0.077187  | 0.523712  | -0.212018 |
| H    | -2.706971 | 0.599768  | 0.049932   | C | -0.171576 | -1.993467 | -0.16923  |
| C    | -3.437375 | -2.678174 | -0.373918  | C | -1.234155 | 0.970604  | -0.186993 |
| N    | -3.238087 | -3.824491 | -0.438579  | H | 0.818712  | 1.315447  | -0.265595 |
| C    | -4.948787 | -0.701747 | -0.14478   | C | -1.542181 | -2.174911 | -0.155222 |
| C    | -6.042271 | -1.278045 | -0.769071  | H | 0.403974  | -2.911194 | -0.119009 |
| C    | -5.138014 | 0.546729  | 0.6444     | C | -2.433617 | 0.245906  | -0.161706 |
| C    | -4.684725 | 0.620066  | 1.973516   | H | -1.351196 | 2.053606  | -0.200955 |
| C    | -5.772541 | 1.665625  | 0.081086   | C | -2.581431 | -1.228313 | -0.153017 |
| C    | -4.878335 | 1.777849  | 2.722986   | H | -1.870638 | -3.212922 | -0.128354 |
| H    | -4.197541 | -0.241362 | 2.418915   | C | -3.721715 | 0.781268  | -0.145547 |
| C    | -5.950782 | 2.82761   | 0.829348   | C | -3.943987 | -1.518664 | -0.130441 |
| H    | -6.115902 | 1.625393  | -0.947147  | H | -3.970574 | 1.835933  | -0.14797  |
| C    | -5.508938 | 2.88528   | 2.151831   | C | -4.665162 | -0.286397 | -0.125601 |
| H    | -4.538754 | 1.814461  | 3.753626   | H | -4.370566 | -2.51051  | -0.119705 |
| H    | -6.437248 | 3.686814  | 0.378135   | C | -6.071683 | -0.032149 | -0.107043 |
| H    | -5.655042 | 3.789214  | 2.73555    | C | -7.145877 | -0.898565 | -0.105584 |
| C    | -7.380818 | -0.827718 | -0.529729  | H | -6.334538 | 1.022195  | -0.111569 |
| N    | -8.486494 | -0.503391 | -0.359888  | C | -6.939528 | -2.314654 | -0.070842 |
| C    | -5.948037 | -2.332705 | -1.731724  | N | -6.745913 | -3.45922  | 0.022285  |

|   |           |           |           |   |            |           |           |
|---|-----------|-----------|-----------|---|------------|-----------|-----------|
| N | -5.925621 | -3.152032 | -2.558898 | C | -8.52124   | -0.381825 | -0.092123 |
|   |           |           |           | C | -9.575486  | -1.05702  | -0.676609 |
|   |           |           |           | C | -8.764831  | 0.916818  | 0.590352  |
|   |           |           |           | C | -8.288933  | 1.127188  | 1.897132  |
|   |           |           |           | C | -9.469274  | 1.949612  | -0.050013 |
|   |           |           |           | C | -8.531186  | 2.332334  | 2.55114   |
|   |           |           |           | H | -7.744816  | 0.335153  | 2.401196  |
|   |           |           |           | C | -9.69515   | 3.1601    | 0.602101  |
|   |           |           |           | H | -9.826569  | 1.807084  | -1.064184 |
|   |           |           |           | C | -9.232017  | 3.352652  | 1.904363  |
|   |           |           |           | H | -8.173233  | 2.47449   | 3.566247  |
|   |           |           |           | H | -10.234032 | 3.951896  | 0.091167  |
|   |           |           |           | H | -9.414993  | 4.294296  | 2.413278  |
|   |           |           |           | C | -10.938078 | -0.647731 | -0.502555 |
|   |           |           |           | N | -12.060664 | -0.362822 | -0.38231  |
|   |           |           |           | C | -9.418301  | -2.190845 | -1.537061 |
|   |           |           |           | N | -9.347726  | -3.081024 | -2.283918 |

**D7BazA3**

**D8A4**

|   |           |           |           |   |           |           |           |
|---|-----------|-----------|-----------|---|-----------|-----------|-----------|
| N | 5.855371  | -0.105893 | -0.034121 | C | 3.185093  | -0.638472 | 0.149135  |
| C | 6.947811  | -0.980174 | 0.272717  | C | 2.290108  | -1.654423 | 0.359317  |
| C | 6.854212  | -1.90849  | 1.322604  | H | 2.718535  | -2.64005  | 0.528718  |
| C | 8.136727  | -0.897991 | -0.455447 | C | 0.834303  | -1.646386 | 0.382424  |
| C | 7.92324   | -2.739575 | 1.621387  | C | 0.166637  | -2.733904 | 0.992298  |
| H | 5.938486  | -1.974436 | 1.900462  | C | 0.023559  | -0.661612 | -0.238581 |
| C | 9.222727  | -1.719491 | -0.148465 | C | -1.214512 | -2.814631 | 1.018298  |
| H | 8.218167  | -0.181431 | -1.266029 | H | 0.757646  | -3.517562 | 1.458321  |
| C | 9.118927  | -2.651713 | 0.890598  | C | -1.354114 | -0.747837 | -0.22268  |
| H | 7.862559  | -3.459221 | 2.430815  | C | -2.019504 | -1.821893 | 0.417369  |
| H | 10.132164 | -1.629264 | -0.729918 | H | -1.693142 | -3.659135 | 1.508246  |
| C | 6.118433  | 1.292667  | -0.19746  | H | -1.928842 | 0.024133  | -0.724191 |
| C | 5.717054  | 1.968048  | -1.352712 | C | 2.810236  | 0.797086  | 0.184616  |
| C | 6.80517   | 1.998719  | 0.803227  | C | 3.205277  | 1.689534  | -0.825326 |
| C | 5.972799  | 3.331431  | -1.508718 | C | 2.070093  | 1.336269  | 1.251096  |
| H | 5.198937  | 1.426271  | -2.137107 | C | 2.849791  | 3.032985  | -0.801473 |
| C | 7.07839   | 3.348733  | 0.647233  | C | 1.716856  | 2.676573  | 1.29457   |
| H | 7.122977  | 1.478931  | 1.701016  | C | 2.080519  | 3.571295  | 0.257609  |
| C | 6.659653  | 4.028994  | -0.507735 | H | 3.206073  | 3.667523  | -1.602785 |
| H | 5.646051  | 3.82894   | -2.413637 | H | 1.13157   | 3.027604  | 2.13528   |
| H | 7.606402  | 3.905905  | 1.413608  | C | 4.610492  | -0.964084 | -0.064579 |
| C | 4.582827  | -0.614762 | -0.189272 | C | 5.640234  | -0.105189 | 0.365911  |
| C | 4.219204  | -1.9168   | -0.510094 | C | 5.015408  | -2.153178 | -0.699872 |
| S | 3.161548  | 0.378062  | 0.111615  | C | 6.979716  | -0.425086 | 0.207934  |
| C | 2.826266  | -2.1104   | -0.522396 | C | 6.351772  | -2.48064  | -0.877953 |
| H | 4.943841  | -2.688634 | -0.733279 | H | 4.2607    | -2.81815  | -1.109105 |
| C | 2.080037  | -0.979344 | -0.226882 | C | 7.385317  | -1.631816 | -0.413234 |
| H | 2.365324  | -3.059309 | -0.771247 | H | 7.721228  | 0.259639  | 0.600678  |
| O | 10.109327 | -3.507163 | 1.27056   | H | 6.585343  | -3.383784 | -1.427338 |
| O | 6.970928  | 5.35416   | -0.557846 | N | 8.733849  | -1.942467 | -0.552923 |
| C | 11.341225 | -3.466271 | 0.565153  | N | 1.690769  | 4.90614   | 0.301185  |
| H | 11.207049 | -3.708116 | -0.496734 | C | 9.149899  | -3.230695 | -1.108073 |
| H | 11.824545 | -2.48492  | 0.652228  | C | 10.460642 | -3.765244 | -0.524949 |
| H | 11.977312 | -4.221826 | 1.027649  | H | 9.231512  | -3.176933 | -2.207381 |
| C | 6.57139   | 6.0976    | -1.700325 | H | 8.371408  | -3.96071  | -0.883406 |
| H | 5.480919  | 6.096545  | -1.821738 | H | 10.674979 | -4.745573 | -0.962206 |
| H | 6.912655  | 7.118979  | -1.52815  | H | 11.314756 | -3.118235 | -0.742587 |
| H | 7.035948  | 5.711273  | -2.616257 | H | 10.385764 | -3.883064 | 0.559983  |
| C | -4.603031 | -0.340305 | -0.154105 | C | 9.72141   | -0.857603 | -0.589177 |
| C | -4.079818 | -1.629507 | -0.441502 | C | 10.421357 | -0.578917 | 0.746871  |
| C | -3.836342 | 0.830233  | 0.09758   | H | 9.229507  | 0.053025  | -0.947451 |
| C | -2.766881 | -2.060318 | -0.524236 | H | 10.47155  | -1.109566 | -1.347977 |
| H | -4.810645 | -2.403674 | -0.631783 | H | 11.122543 | 0.25599   | 0.638145  |

|   |            |           |           |   |            |           |           |
|---|------------|-----------|-----------|---|------------|-----------|-----------|
| C | -2.464241  | 1.026392  | 0.154755  | H | 9.700948   | -0.318647 | 1.527263  |
| H | -4.423723  | 1.726287  | 0.283734  | H | 10.982095  | -1.45099  | 1.09255   |
| C | -1.567971  | -1.350802 | -0.348298 | C | 1.978146   | 5.800124  | -0.821257 |
| H | -2.643552  | -3.115146 | -0.76397  | C | 0.940093   | 6.908198  | -1.016488 |
| C | -1.425739  | 0.106544  | -0.028674 | H | 1.988996   | 5.200548  | -1.732552 |
| H | -2.148103  | 2.044631  | 0.375267  | H | 2.981724   | 6.248747  | -0.721121 |
| C | -0.285963  | -1.870626 | -0.447919 | H | 1.205094   | 7.495947  | -1.901066 |
| C | -0.061952  | 0.373869  | 0.045813  | H | -0.057006  | 6.486624  | -1.172649 |
| H | -0.0465    | -2.902463 | -0.668934 | H | 0.893469   | 7.598862  | -0.17009  |
| C | 0.658896   | -0.825303 | -0.209327 | C | 1.430957   | 5.536463  | 1.601189  |
| H | 0.374839   | 1.341131  | 0.261025  | C | -0.048096  | 5.604407  | 2.000615  |
| C | -6.032833  | -0.105332 | -0.104041 | H | 1.848442   | 6.549597  | 1.57372   |
| C | -7.140016  | -0.918055 | -0.220505 | H | 1.999011   | 5.00217   | 2.370434  |
| H | -6.289848  | 0.938532  | 0.048176  | H | -0.151096  | 6.070292  | 2.986949  |
| C | -7.066979  | -2.340988 | -0.356242 | H | -0.62745   | 6.192322  | 1.2846    |
| N | -7.028735  | -3.504663 | -0.397522 | H | -0.495382  | 4.607579  | 2.047145  |
| C | -8.488561  | -0.319255 | -0.140555 | H | 0.494113   | 0.167408  | -0.751371 |
| C | -9.54513   | -0.800005 | -0.887288 | H | 1.764506   | 0.684993  | 2.064192  |
| C | -8.686599  | 0.825081  | 0.785427  | H | 5.381778   | 0.823311  | 0.864341  |
| C | -8.214551  | 0.749652  | 2.108968  | H | 3.804742   | 1.322217  | -1.65318  |
| C | -9.343723  | 1.993825  | 0.365145  | C | -3.45558   | -1.956002 | 0.473097  |
| C | -8.41743   | 1.806353  | 2.992206  | C | -4.381402  | -1.095251 | -0.046253 |
| H | -7.706124  | -0.148307 | 2.444463  | H | -3.804701  | -2.845999 | 0.990659  |
| C | -9.529973  | 3.0554    | 1.248036  | H | -4.038482  | -0.202389 | -0.561757 |
| H | -9.694965  | 2.074897  | -0.657717 | C | -5.798048  | -1.235809 | 0.012492  |
| C | -9.07336   | 2.962637  | 2.563528  | C | -6.698712  | -0.334768 | -0.526642 |
| H | -8.064099  | 1.726789  | 4.015672  | C | -6.598939  | -2.359056 | 0.655815  |
| H | -10.032351 | 3.954864  | 0.9062    | C | -8.042408  | -0.804892 | -0.274612 |
| H | -9.225545  | 3.788616  | 3.251764  | O | -7.987478  | -1.964662 | 0.401931  |
| C | -10.894689 | -0.359753 | -0.687831 | C | -6.317207  | 0.850879  | -1.208477 |
| N | -12.007447 | -0.043051 | -0.557747 | N | -5.905461  | 1.796556  | -1.748804 |
| C | -9.394277  | -1.746024 | -1.952218 | C | -6.412237  | -3.719799 | -0.025336 |
| N | -9.316206  | -2.472138 | -2.858595 | H | -6.567587  | -3.632292 | -1.103251 |
|   |            |           |           | H | -5.408698  | -4.113414 | 0.149147  |
|   |            |           |           | H | -7.141349  | -4.42773  | 0.376801  |
|   |            |           |           | C | -9.272146  | -0.274424 | -0.602986 |
|   |            |           |           | C | -9.41386   | 0.949646  | -1.317319 |
|   |            |           |           | N | -9.574518  | 1.94602   | -1.898931 |
|   |            |           |           | C | -10.461661 | -0.963062 | -0.220524 |
|   |            |           |           | N | -11.436312 | -1.520329 | 0.08904   |
|   |            |           |           | C | -6.449064  | -2.42821  | 2.180083  |
|   |            |           |           | H | -5.446653  | -2.756737 | 2.462512  |
|   |            |           |           | H | -6.63161   | -1.448084 | 2.627049  |
|   |            |           |           | H | -7.177049  | -3.137066 | 2.582639  |

#### D8Baz(r)A4

|   |          |           |           |
|---|----------|-----------|-----------|
| C | 6.039441 | -0.601207 | 0.026466  |
| C | 5.050257 | -1.523008 | 0.217655  |
| H | 5.378273 | -2.554247 | 0.332176  |
| C | 3.59717  | -1.370816 | 0.288973  |
| C | 2.847498 | -2.397492 | 0.902388  |
| C | 2.8685   | -0.303955 | -0.281081 |
| C | 1.463463 | -2.346909 | 0.983341  |
| H | 3.372496 | -3.252397 | 1.32044   |
| C | 1.483754 | -0.264181 | -0.219047 |
| C | 0.740901 | -1.275443 | 0.424265  |
| H | 0.930447 | -3.171012 | 1.447237  |
| H | 0.966272 | 0.58678   | -0.650964 |
| C | 5.823753 | 0.868055  | 0.094981  |
| C | 6.312584 | 1.728061  | -0.900732 |
| C | 5.154048 | 1.468256  | 1.174386  |
| C | 6.11482  | 3.103621  | -0.850202 |

#### D8BazA4

|   |          |           |           |
|---|----------|-----------|-----------|
| C | 6.088543 | -0.585992 | 0.019773  |
| C | 5.113782 | -1.533425 | 0.166123  |
| H | 5.461795 | -2.558684 | 0.27548   |
| C | 3.658881 | -1.4146   | 0.193161  |
| C | 2.912895 | -2.471233 | 0.763039  |
| C | 2.924076 | -0.352683 | -0.382632 |
| C | 1.528669 | -2.455431 | 0.794524  |
| H | 3.445565 | -3.316247 | 1.191477  |
| C | 1.539879 | -0.344165 | -0.362691 |
| C | 0.7971   | -1.387091 | 0.234364  |
| H | 1.002143 | -3.292683 | 1.240766  |
| H | 1.018048 | 0.493567  | -0.813569 |
| C | 5.837836 | 0.875037  | 0.119792  |
| C | 6.341898 | 1.77522   | -0.832244 |
| C | 5.11904  | 1.428347  | 1.193122  |
| C | 6.115769 | 3.144595  | -0.745763 |

|   |           |           |           |   |           |           |           |
|---|-----------|-----------|-----------|---|-----------|-----------|-----------|
| C | 4.951878  | 2.839715  | 1.240882  | C | 4.888934  | 2.7927    | 1.295664  |
| C | 5.413158  | 3.70548   | 0.219708  | C | 5.369228  | 3.699216  | 0.319394  |
| H | 6.542541  | 3.707686  | -1.640063 | H | 6.556573  | 3.781353  | -1.502078 |
| H | 4.410011  | 3.239339  | 2.089304  | H | 4.311102  | 3.155401  | 2.136833  |
| C | 7.423746  | -1.070222 | -0.215827 | C | 7.487572  | -1.020395 | -0.195064 |
| C | 8.541437  | -0.359319 | 0.26009   | C | 8.578617  | -0.291668 | 0.315313  |
| C | 7.693364  | -2.254037 | -0.92516  | C | 7.799899  | -2.189771 | -0.911659 |
| C | 9.83764   | -0.817204 | 0.075631  | C | 9.888314  | -0.718978 | 0.155554  |
| C | 8.986285  | -2.716995 | -1.131587 | C | 9.106734  | -2.622568 | -1.09239  |
| H | 6.868759  | -2.804807 | -1.367999 | H | 6.998189  | -2.752495 | -1.380631 |
| C | 10.106238 | -2.019607 | -0.621559 | C | 10.199273 | -1.907363 | -0.54829  |
| H | 10.651326 | -0.245781 | 0.505397  | H | 10.679167 | -0.135033 | 0.610406  |
| H | 9.117601  | -3.605283 | -1.736438 | H | 9.271147  | -3.500507 | -1.704131 |
| N | 11.414516 | -2.471084 | -0.787102 | N | 11.520367 | -2.328426 | -0.687891 |
| N | 5.173177  | 5.07785   | 0.28716   | N | 5.104496  | 5.0643    | 0.425294  |
| C | 11.67154  | -3.760361 | -1.427748 | C | 11.82192  | -3.603412 | -1.337845 |
| C | 12.9415   | -4.459224 | -0.935031 | C | 13.093547 | -4.281044 | -0.820315 |
| H | 11.712612 | -3.656279 | -2.52623  | H | 11.889817 | -3.483517 | -2.433356 |
| H | 10.830539 | -4.418343 | -1.203867 | H | 10.989862 | -4.282196 | -1.145043 |
| H | 13.029902 | -5.4329   | -1.427438 | H | 13.218279 | -5.244652 | -1.32453  |
| H | 13.850592 | -3.896157 | -1.163699 | H | 13.995186 | -3.693633 | -1.014863 |
| H | 12.901611 | -4.624651 | 0.145575  | H | 13.027753 | -4.46413  | 0.25618   |
| C | 12.510601 | -1.495076 | -0.800807 | C | 12.595    | -1.329254 | -0.660069 |
| C | 13.269906 | -1.36352  | 0.525124  | C | 13.313992 | -1.19626  | 0.688041  |
| H | 12.108975 | -0.519637 | -1.095677 | H | 12.180871 | -0.359403 | -0.956124 |
| H | 13.210567 | -1.78146  | -1.594626 | H | 13.323031 | -1.592073 | -1.436581 |
| H | 14.056145 | -0.605405 | 0.436599  | H | 14.086834 | -0.421711 | 0.62896   |
| H | 12.601709 | -1.067427 | 1.338589  | H | 12.617603 | -0.921902 | 1.485302  |
| H | 13.738809 | -2.308541 | 0.810691  | H | 13.793753 | -2.134625 | 0.97744   |
| C | 5.572909  | 5.949276  | -0.817181 | C | 5.527275  | 5.98022   | -0.633641 |
| C | 4.682387  | 7.182531  | -0.990212 | C | 4.62428   | 7.206313  | -0.792537 |
| H | 5.509247  | 5.370878  | -1.740093 | H | 5.503323  | 5.434338  | -1.578034 |
| H | 6.62504   | 6.267288  | -0.711716 | H | 6.570294  | 6.309101  | -0.481268 |
| H | 5.020197  | 7.750949  | -1.862644 | H | 4.982588  | 7.811066  | -1.631723 |
| H | 3.640656  | 6.891428  | -1.154039 | H | 3.593187  | 6.906907  | -1.002305 |
| H | 4.719478  | 7.856343  | -0.129687 | H | 4.622031  | 7.848365  | 0.092719  |
| C | 5.01388   | 5.710252  | 1.602155  | C | 4.889978  | 5.647517  | 1.755238  |
| C | 3.560183  | 5.952664  | 2.026298  | C | 3.418724  | 5.852346  | 2.136638  |
| H | 5.552452  | 6.665133  | 1.586849  | H | 5.413227  | 6.610226  | 1.791981  |
| H | 5.521148  | 5.094973  | 2.353232  | H | 5.381038  | 5.013509  | 2.501481  |
| H | 3.528239  | 6.41053   | 3.021302  | H | 3.344869  | 6.27396   | 3.145319  |
| H | 3.048233  | 6.619775  | 1.328155  | H | 2.920055  | 6.535735  | 1.444696  |
| H | 2.9951    | 5.017166  | 2.064017  | H | 2.868464  | 4.907453  | 2.121885  |
| H | 3.397067  | 0.497624  | -0.781548 | H | 3.451277  | 0.463873  | -0.860056 |
| H | 4.778071  | 0.841895  | 1.977519  | H | 4.728454  | 0.769973  | 1.962874  |
| H | 8.38736   | 0.561428  | 0.813655  | H | 8.392013  | 0.618164  | 0.876723  |
| H | 6.865562  | 1.310384  | -1.737014 | H | 6.929651  | 1.39463   | -1.662486 |
| C | -0.738927 | -1.219401 | 0.499821  | C | -5.936568 | -1.27916  | 0.347278  |
| C | -1.420568 | -0.708185 | -0.632528 | C | -5.294864 | -2.26271  | 1.140001  |
| C | -2.77717  | -0.527063 | -0.857531 | C | -3.945557 | -2.538993 | 1.326355  |
| C | -1.337164 | -1.681247 | 1.693436  | C | -5.29624  | -0.321498 | -0.480165 |
| C | -3.871835 | -0.807552 | -0.026736 | C | -2.827985 | -1.912356 | 0.770754  |
| C | -2.678141 | -1.759656 | 2.054772  | C | -3.947766 | -0.097191 | -0.707162 |
| C | -3.821659 | -1.391267 | 1.340159  | C | -2.827972 | -0.756219 | -0.181599 |
| H | -0.782    | -0.442279 | -1.468862 | H | -5.9691   | -2.907982 | 1.698946  |
| H | -3.034584 | -0.115275 | -1.83251  | H | -3.727585 | -3.364715 | 2.001859  |
| H | -0.640024 | -1.99933  | 2.462235  | H | -5.955903 | 0.342477  | -1.028699 |
| H | -2.865914 | -2.156432 | 3.051829  | H | -3.721457 | 0.714907  | -1.396259 |
| C | -5.214104 | -0.594143 | -0.338632 | C | -1.493428 | -2.244398 | 1.001207  |
| H | -5.578519 | -0.178401 | -1.269162 | H | -1.16193  | -3.032063 | 1.664683  |
| C | -6.007442 | -1.013216 | 0.766906  | C | -0.658445 | -1.36755  | 0.260087  |
| C | -7.437618 | -0.976418 | 0.888851  | C | -7.389687 | -1.298923 | 0.426617  |

|   |            |           |           |   |            |           |           |
|---|------------|-----------|-----------|---|------------|-----------|-----------|
| C | -8.304362  | -0.515751 | -0.061543 | C | -8.279034  | -0.440492 | -0.152422 |
| H | -7.831358  | -1.354251 | 1.828748  | H | -7.787839  | -2.103781 | 1.037218  |
| H | -7.89536   | -0.141172 | -0.996322 | H | -7.914345  | 0.385588  | -0.755718 |
| C | -9.726239  | -0.46776  | 0.03256   | C | -9.701389  | -0.502418 | -0.044404 |
| C | -10.561221 | 0.007664  | -0.960972 | C | -10.567306 | 0.393358  | -0.641736 |
| C | -10.598752 | -0.909211 | 1.198685  | C | -10.539933 | -1.521294 | 0.714913  |
| C | -11.932785 | -0.098726 | -0.512753 | C | -11.927353 | 0.020634  | -0.317147 |
| O | -11.955826 | -0.623551 | 0.723432  | O | -11.912799 | -1.075337 | 0.459231  |
| C | -10.101927 | 0.51098   | -2.207041 | C | -10.145376 | 1.490158  | -1.439372 |
| N | -9.630889  | 0.904581  | -3.196281 | N | -9.702239  | 2.358339  | -2.075959 |
| C | -10.551518 | -2.41728  | 1.470349  | C | -10.443363 | -2.943912 | 0.150945  |
| H | -10.729755 | -2.978609 | 0.550102  | H | -10.623864 | -2.941873 | -0.926598 |
| H | -9.581689  | -2.714108 | 1.875315  | H | -9.45762   | -3.375919 | 0.336041  |
| H | -11.327801 | -2.677229 | 2.194442  | H | -11.197165 | -3.57337  | 0.630469  |
| C | -13.120953 | 0.23573   | -1.126406 | C | -13.134681 | 0.586854  | -0.664938 |
| C | -13.178469 | 0.79707   | -2.434312 | C | -13.230342 | 1.748757  | -1.483481 |
| N | -13.270695 | 1.257599  | -3.500164 | N | -13.353064 | 2.696644  | -2.149042 |
| C | -14.353277 | 0.019459  | -0.440492 | C | -14.348332 | 0.001137  | -0.195927 |
| N | -15.362069 | -0.15474  | 0.114596  | N | -15.341724 | -0.472916 | 0.184105  |
| C | -10.406197 | -0.06818  | 2.465973  | C | -10.354073 | -1.467287 | 2.235944  |
| H | -9.425817  | -0.247711 | 2.912404  | H | -9.367279  | -1.83333  | 2.52687   |
| H | -10.492473 | 0.996405  | 2.235825  | H | -10.465542 | -0.44304  | 2.599405  |
| H | -11.177091 | -0.332036 | 3.19435   | H | -11.113215 | -2.092264 | 2.712875  |
| C | -5.14381   | -1.49701  | 1.783682  | C | -1.497305  | -0.463674 | -0.456012 |
| H | -5.45855   | -1.884878 | 2.745173  | H | -1.164717  | 0.314319  | -1.130229 |

#### D4A5

|   |           |           |           |
|---|-----------|-----------|-----------|
| C | 4.63521   | -2.181659 | -0.394241 |
| C | 5.421658  | 0.024167  | 0.429168  |
| C | 3.637684  | -2.779337 | -1.381996 |
| C | 3.01962   | -3.045808 | -0.034291 |
| C | 1.943949  | -1.20294  | -0.409731 |
| C | 2.219182  | -2.632248 | -0.830424 |
| C | 0.647898  | -0.72174  | -0.377764 |
| H | -0.147272 | -1.391949 | -0.689754 |
| C | 0.330185  | 0.600144  | 0.007174  |
| C | 1.409784  | 1.421902  | 0.400449  |
| C | 2.719196  | 0.979498  | 0.399909  |
| C | 3.828868  | 1.894801  | 0.874703  |
| C | 5.163785  | 1.514954  | 0.233298  |
| H | 5.986536  | 2.086733  | 0.673639  |
| H | 3.571605  | 2.934796  | 0.651118  |
| H | 3.724946  | -2.258033 | -2.342098 |
| H | 1.479788  | -2.951844 | -1.572157 |
| H | 1.222265  | 2.429797  | 0.748959  |
| N | 4.324122  | -0.78331  | -0.102732 |
| H | 3.921321  | 1.826386  | 1.96802   |
| H | 5.143655  | 1.740136  | -0.839094 |
| H | 6.336235  | -0.277223 | -0.092482 |
| H | 5.576366  | -0.195066 | 1.498692  |
| H | 4.64845   | -2.775607 | 0.534799  |
| H | 5.648677  | -2.215817 | -0.807581 |
| H | 3.883251  | -3.831684 | -1.55534  |
| H | 2.09814   | -3.301348 | 0.033481  |
| C | -1.049603 | 1.053511  | -0.009614 |
| C | -1.483017 | 2.363281  | -0.110834 |
| C | -2.112068 | 0.005876  | 0.094249  |
| C | -2.996821 | -0.269194 | -0.952218 |
| C | -2.261705 | -0.760016 | 1.25454   |
| C | -3.957037 | -1.267082 | -0.788856 |
| C | -3.262478 | -1.727494 | 1.309293  |
| C | -2.871649 | 2.695544  | -0.007842 |

#### D4Baz(r)A5

|   |           |           |           |
|---|-----------|-----------|-----------|
| C | 8.682532  | -1.64799  | -0.452364 |
| C | 8.910997  | 0.439735  | 0.86243   |
| C | 7.936798  | -2.195613 | -1.666193 |
| C | 6.695134  | -0.267449 | 0.031169  |
| C | 5.86366   | -1.216493 | -0.624578 |
| C | 6.469133  | -2.428869 | -1.304771 |
| C | 4.488301  | -1.031251 | -0.633499 |
| H | 3.883833  | -1.753096 | -1.175671 |
| C | 3.863084  | 0.071422  | -0.022305 |
| C | 4.706997  | 0.998163  | 0.617924  |
| C | 6.085156  | 0.846439  | 0.67198   |
| C | 6.930431  | 1.849899  | 1.431035  |
| C | 8.370753  | 1.865904  | 0.916245  |
| H | 9.009741  | 2.475805  | 1.56278   |
| H | 6.481883  | 2.846382  | 1.356402  |
| H | 8.014003  | -1.474028 | -2.487574 |
| H | 5.887593  | -2.683688 | -2.197433 |
| H | 4.270593  | 1.847365  | 1.13644   |
| N | 8.075245  | -0.407589 | 0.017961  |
| H | 6.933856  | 1.595092  | 2.500595  |
| H | 8.40762   | 2.301315  | -0.088962 |
| H | 9.923286  | 0.430493  | 0.444023  |
| H | 8.98336   | 0.028026  | 1.884232  |
| H | 8.702889  | -2.406318 | 0.349778  |
| H | 9.724553  | -1.430563 | -0.710481 |
| H | 8.409039  | -3.125331 | -1.999098 |
| H | 6.397637  | -3.298062 | -0.635233 |
| C | 2.396464  | 0.246203  | -0.052322 |
| C | 1.606785  | -0.928246 | 0.012007  |
| C | 1.905303  | 1.573796  | -0.141324 |
| C | 0.227857  | -1.085873 | -0.000723 |
| H | 2.167015  | -1.850883 | 0.123278  |
| C | 0.603273  | 2.049137  | -0.180123 |
| H | 2.66999   | 2.339125  | -0.225926 |
| C | -0.784485 | -0.120704 | -0.06897  |



|   |           |           |           |   |           |           |           |
|---|-----------|-----------|-----------|---|-----------|-----------|-----------|
| N | -3.99646  | 2.982816  | 0.082946  | H | -0.121004 | -2.115428 | 0.070316  |
| C | -0.627858 | 3.484248  | -0.34881  | C | -0.610835 | 1.347065  | -0.154765 |
| N | 0.030315  | 4.423719  | -0.551031 | H | 0.505552  | 3.130951  | -0.259634 |
| F | -4.787578 | -1.530201 | -1.796934 | C | -2.158001 | -0.368451 | -0.062896 |
| F | -3.399261 | -2.449361 | 2.422346  | C | -1.882063 | 1.919507  | -0.20993  |
| F | -1.460298 | -0.565445 | 2.307786  | H | -2.613914 | -1.348045 | -0.018788 |
| F | -2.924351 | 0.405168  | -2.103802 | C | -2.848889 | 0.874013  | -0.153179 |
| N | -4.083589 | -1.975106 | 0.311997  | H | -2.079151 | 2.978726  | -0.267153 |
|   |           |           |           | C | -4.289502 | 0.979441  | -0.178196 |
|   |           |           |           | C | -5.031828 | 2.114243  | -0.439829 |
|   |           |           |           | C | -5.060235 | -0.272321 | 0.104334  |
|   |           |           |           | C | -5.766309 | -0.947344 | -0.893636 |
|   |           |           |           | C | -5.099433 | -0.828563 | 1.385188  |
|   |           |           |           | C | -6.454266 | -2.115547 | -0.568873 |
|   |           |           |           | C | -5.823646 | -2.000192 | 1.595926  |
|   |           |           |           | C | -6.462537 | 2.089952  | -0.392946 |
|   |           |           |           | N | -7.626153 | 2.088309  | -0.352541 |
|   |           |           |           | C | -4.474926 | 3.387018  | -0.774722 |
|   |           |           |           | N | -4.060597 | 4.439947  | -1.049431 |
|   |           |           |           | F | -7.1175   | -2.75903  | -1.529225 |
|   |           |           |           | F | -5.855844 | -2.524626 | 2.821826  |
|   |           |           |           | F | -4.453793 | -0.245881 | 2.401277  |
|   |           |           |           | F | -5.783944 | -0.484998 | -2.147824 |
|   |           |           |           | N | -6.478904 | -2.626271 | 0.642733  |

#### D4BazA5

|   |           |           |           |
|---|-----------|-----------|-----------|
| C | 8.753436  | -1.676519 | -0.301731 |
| C | 8.988186  | 0.614864  | 0.612607  |
| C | 7.962849  | -2.449191 | -1.353773 |
| C | 6.755446  | -0.258627 | 0.018075  |
| C | 5.916935  | -1.31973  | -0.425518 |
| C | 6.521287  | -2.634133 | -0.87802  |
| C | 4.541648  | -1.148385 | -0.428298 |
| H | 3.930294  | -1.976759 | -0.774093 |
| C | 3.918222  | 0.037423  | 0.007398  |
| C | 4.769706  | 1.067713  | 0.452524  |
| C | 6.150192  | 0.946434  | 0.473224  |
| C | 7.006561  | 2.085713  | 0.989489  |
| C | 8.424754  | 2.020319  | 0.420986  |
| H | 9.077813  | 2.747475  | 0.914115  |
| H | 6.536313  | 3.044369  | 0.745555  |
| H | 7.980545  | -1.890436 | -2.29663  |
| H | 5.905738  | -3.072679 | -1.670785 |
| H | 4.340117  | 2.006592  | 0.789228  |
| N | 8.135885  | -0.383955 | -0.02392  |
| H | 7.057558  | 2.039872  | 2.086895  |
| H | 8.414367  | 2.258566  | -0.648845 |
| H | 9.983701  | 0.537647  | 0.162122  |
| H | 9.107256  | 0.401908  | 1.689322  |
| H | 8.838525  | -2.278377 | 0.619936  |
| H | 9.773977  | -1.48843  | -0.652709 |
| H | 8.442465  | -3.416428 | -1.535124 |
| H | 6.507364  | -3.353111 | -0.046136 |
| C | -2.765436 | 0.774638  | -0.087438 |
| C | -2.025365 | 1.814702  | 0.517213  |
| C | -2.254533 | -0.427653 | -0.630878 |
| C | -0.652826 | 1.945298  | 0.695987  |
| H | -2.612219 | 2.624877  | 0.935172  |
| C | -0.941439 | -0.862041 | -0.765516 |
| H | -2.997583 | -1.106506 | -1.038577 |
| C | 0.382137  | 1.088145  | 0.312803  |
| H | -0.338873 | 2.851666  | 1.210542  |

#### D7A2

|   |           |           |           |
|---|-----------|-----------|-----------|
| N | 1.504616  | -0.102559 | 0.188309  |
| C | 0.170243  | -0.304865 | 0.397369  |
| C | -0.447111 | -1.450425 | 0.91095   |
| S | -1.009952 | 0.916904  | -0.0412   |
| C | -1.836456 | -1.352475 | 0.917246  |
| H | 0.105156  | -2.311442 | 1.260565  |
| C | -2.347357 | -0.142608 | 0.43506   |
| H | -2.47431  | -2.137391 | 1.303861  |
| C | -4.235179 | 1.535037  | 0.349091  |
| C | -3.725003 | 0.231345  | 0.383086  |
| C | -4.740866 | -0.835464 | 0.38265   |
| C | -4.720827 | -1.992179 | -0.332875 |
| H | -5.638016 | -0.650945 | 0.967351  |
| C | -3.438931 | 2.712697  | 0.426785  |
| N | -2.82455  | 3.701484  | 0.495794  |
| C | -5.639046 | 1.760808  | 0.23444   |
| N | -6.788969 | 1.936147  | 0.152534  |
| C | -3.705301 | -2.364703 | -1.278802 |
| N | -2.928084 | -2.715041 | -2.069596 |
| C | -5.808533 | -2.923228 | -0.208789 |
| N | -6.678387 | -3.687385 | -0.102092 |
| C | 2.032941  | 1.212465  | -0.055769 |
| C | 2.764394  | 1.464778  | -1.226008 |
| C | 1.841576  | 2.239982  | 0.870079  |
| C | 3.282496  | 2.727646  | -1.465059 |
| H | 2.919835  | 0.666401  | -1.943982 |
| C | 2.345536  | 3.517988  | 0.627165  |
| H | 1.290577  | 2.047335  | 1.784659  |
| C | 3.069949  | 3.768258  | -0.545147 |
| H | 3.844842  | 2.941101  | -2.367508 |
| H | 2.172344  | 4.299478  | 1.356113  |
| C | 2.407635  | -1.219721 | 0.144413  |
| C | 3.570988  | -1.201192 | 0.914959  |
| C | 2.153111  | -2.315711 | -0.694875 |
| C | 4.477093  | -2.260709 | 0.860787  |
| H | 3.773621  | -0.35097  | 1.557897  |

|   |           |           |           |   |          |           |           |
|---|-----------|-----------|-----------|---|----------|-----------|-----------|
| C | 0.246666  | -0.23826  | -0.373504 | C | 3.043383 | -3.377945 | -0.742749 |
| H | -0.819797 | -1.829839 | -1.249171 | H | 1.257515 | -2.331193 | -1.307319 |
| C | 1.743356  | 1.298137  | 0.512314  | C | 4.21363  | -3.360124 | 0.033415  |
| C | 1.534819  | -0.736757 | -0.539503 | H | 5.372683 | -2.220154 | 1.46842   |
| H | 2.163197  | 2.168409  | 0.998793  | H | 2.861146 | -4.231025 | -1.387216 |
| C | 2.473343  | 0.191903  | -0.005896 | O | 3.607561 | 4.970199  | -0.881152 |
| H | 1.770508  | -1.678592 | -1.01684  | O | 5.020967 | -4.447585 | -0.091781 |
| C | -4.231771 | 0.934934  | -0.155262 | C | 3.386498 | 6.076936  | -0.01508  |
| C | -4.873036 | 2.119566  | -0.435054 | H | 3.875283 | 6.928721  | -0.488776 |
| C | -5.071603 | -0.270913 | 0.100058  | H | 2.316815 | 6.289366  | 0.099345  |
| C | -5.009229 | -0.940451 | 1.327414  | H | 3.830996 | 5.90961   | 0.973851  |
| C | -5.94087  | -0.804492 | -0.857194 | C | 6.22143  | -4.490587 | 0.667992  |
| C | -5.801712 | -2.067844 | 1.530686  | H | 6.017431 | -4.466638 | 1.745642  |
| C | -6.680786 | -1.944776 | -0.545789 | H | 6.702261 | -5.435759 | 0.414282  |
| C | -6.300145 | 2.237017  | -0.365286 | H | 6.892681 | -3.662438 | 0.40883   |
| N | -7.45622  | 2.353151  | -0.300394 |   |          |           |           |
| C | -4.20279  | 3.31785   | -0.846205 |   |          |           |           |
| N | -3.71907  | 4.315051  | -1.201239 |   |          |           |           |
| F | -5.741321 | -2.692248 | 2.706565  |   |          |           |           |
| F | -7.49613  | -2.451666 | -1.46894  |   |          |           |           |
| F | -6.054432 | -0.245151 | -2.065621 |   |          |           |           |
| F | -4.211765 | -0.497147 | 2.304374  |   |          |           |           |
| N | -6.611515 | -2.556192 | 0.616175  |   |          |           |           |

**D7Baz(r)A2**

|   |           |           |           |
|---|-----------|-----------|-----------|
| N | -4.53579  | -0.149517 | -0.104876 |
| C | -3.248787 | -0.532904 | -0.404527 |
| C | -2.833768 | -1.660897 | -1.10226  |
| S | -1.868078 | 0.380787  | 0.184713  |
| C | -1.43531  | -1.781901 | -1.164474 |
| H | -3.525315 | -2.356534 | -1.558543 |
| C | -0.726611 | -0.763959 | -0.540704 |
| H | -0.951958 | -2.582175 | -1.711727 |
| C | 0.708241  | -0.559285 | -0.476567 |
| C | 1.180188  | 0.734545  | -0.121649 |
| C | 1.527142  | -1.686031 | -0.771731 |
| C | 2.470792  | 1.215835  | 0.007657  |
| H | 0.407787  | 1.477468  | 0.053796  |
| C | 2.903998  | -1.804361 | -0.812848 |
| H | 0.991332  | -2.607831 | -0.968761 |
| C | 3.699524  | 0.565156  | -0.183704 |
| H | 2.546303  | 2.266152  | 0.285028  |
| C | 3.901893  | -0.84917  | -0.55894  |
| H | 3.273419  | -2.79759  | -1.064418 |
| C | 4.960777  | 1.14914   | -0.047578 |
| C | 5.277804  | -1.06903  | -0.606805 |
| H | 5.145966  | 2.172961  | 0.242687  |
| C | 5.942888  | 0.153469  | -0.296991 |
| H | 5.75466   | -2.001106 | -0.879262 |
| C | 8.029427  | 1.507331  | -0.624091 |
| C | 7.381495  | 0.319991  | -0.300104 |
| C | 8.251681  | -0.823583 | 0.000238  |
| C | 8.045759  | -1.793196 | 0.932548  |
| H | 9.192098  | -0.879195 | -0.541474 |
| C | 7.357913  | 2.697818  | -1.035832 |
| N | 6.858709  | 3.692423  | -1.379842 |
| C | 9.454314  | 1.610111  | -0.571871 |
| N | 10.616781 | 1.682774  | -0.537845 |
| C | 6.960896  | -1.836617 | 1.873037  |
| N | 6.143874  | -1.924205 | 2.695769  |
| C | 9.010839  | -2.848627 | 1.076068  |
| N | 9.781771  | -3.71211  | 1.186875  |

**D7BazA2**

|   |           |           |           |
|---|-----------|-----------|-----------|
| N | -4.546389 | -0.138621 | -0.107848 |
| C | -3.25699  | -0.512981 | -0.421202 |
| C | -2.847041 | -1.624599 | -1.147899 |
| S | -1.871812 | 0.386124  | 0.18605   |
| C | -1.44829  | -1.746657 | -1.221    |
| H | -3.544126 | -2.311696 | -1.608984 |
| C | -0.743465 | -0.743135 | -0.572967 |
| H | -0.953583 | -2.544857 | -1.762269 |
| C | 5.883235  | 0.116067  | -0.26439  |
| C | 5.42961   | -1.044948 | -0.93528  |
| C | 5.097982  | 1.111589  | 0.353129  |
| C | 4.136394  | -1.484075 | -1.175637 |
| H | 6.210574  | -1.675729 | -1.351019 |
| C | 3.715909  | 1.206785  | 0.47482   |
| H | 5.653179  | 1.90853   | 0.837929  |
| C | 2.916048  | -0.909868 | -0.795166 |
| H | 4.056198  | -2.410146 | -1.741935 |
| C | 2.720572  | 0.355542  | -0.013221 |
| H | 3.357575  | 2.070498  | 1.031459  |
| C | 1.652868  | -1.416559 | -1.067283 |
| C | 1.347671  | 0.526554  | 0.139105  |
| H | 1.451337  | -2.327908 | -1.614788 |
| C | 0.671337  | -0.547705 | -0.5015   |
| H | 0.876169  | 1.349759  | 0.661099  |
| C | 7.933162  | 1.506595  | -0.645688 |
| C | 7.350532  | 0.312667  | -0.241119 |
| C | 8.251946  | -0.748473 | 0.18413   |
| C | 7.978931  | -1.803283 | 1.007135  |
| H | 9.283382  | -0.672047 | -0.148571 |
| C | 7.192925  | 2.588474  | -1.215873 |
| N | 6.643848  | 3.493241  | -1.701606 |
| C | 9.342443  | 1.732687  | -0.544272 |
| N | 10.491444 | 1.907848  | -0.468254 |
| C | 6.739424  | -2.053349 | 1.684228  |
| N | 5.785857  | -2.312846 | 2.297818  |
| C | 9.021348  | -2.746661 | 1.29936   |
| N | 9.860683  | -3.51766  | 1.531808  |

|   |            |           |           |   |            |           |           |
|---|------------|-----------|-----------|---|------------|-----------|-----------|
| C | -4.852316  | 1.214991  | 0.201236  | C | -4.869383  | 1.22231   | 0.19972   |
| C | -5.53587   | 1.526965  | 1.386936  | C | -5.57659   | 1.527816  | 1.373682  |
| C | -4.507576  | 2.244482  | -0.677724 | C | -4.505991  | 2.258493  | -0.664202 |
| C | -5.859513  | 2.84169   | 1.683723  | C | -5.90557   | 2.840715  | 1.672673  |
| H | -5.811417  | 0.730679  | 2.070487  | H | -5.866001  | 0.727512  | 2.046685  |
| C | -4.814327  | 3.572503  | -0.376924 | C | -4.817852  | 3.584622  | -0.360354 |
| H | -3.993865  | 2.009413  | -1.60419  | H | -3.973463  | 2.029888  | -1.581491 |
| C | -5.496174  | 3.877626  | 0.807592  | C | -5.523788  | 3.882373  | 0.811566  |
| H | -6.385133  | 3.09686   | 2.597527  | H | -6.44928   | 3.089791  | 2.577589  |
| H | -4.53067   | 4.350344  | -1.075177 | H | -4.518632  | 4.366797  | -1.047224 |
| C | -5.590813  | -1.120188 | -0.090347 | C | -5.592597  | -1.117023 | -0.08769  |
| C | -6.785694  | -0.864623 | -0.766191 | C | -6.798776  | -0.867384 | -0.746023 |
| C | -5.453004  | -2.321245 | 0.624105  | C | -5.434999  | -2.323785 | 0.613523  |
| C | -7.835175  | -1.784302 | -0.735479 | C | -7.839586  | -1.796869 | -0.709607 |
| H | -6.900658  | 0.063385  | -1.316439 | H | -6.929145  | 0.063818  | -1.287357 |
| C | -6.485525  | -3.246434 | 0.645005  | C | -6.458716  | -3.258488 | 0.639576  |
| H | -4.532859  | -2.523955 | 1.161811  | H | -4.505562  | -2.52314  | 1.136216  |
| C | -7.687645  | -2.986117 | -0.032442 | C | -7.672028  | -3.003267 | -0.019461 |
| H | -8.751026  | -1.556743 | -1.267036 | H | -8.764187  | -1.573153 | -1.227553 |
| H | -6.391883  | -4.176511 | 1.195276  | H | -6.349078  | -4.192728 | 1.179814  |
| O | -5.853014  | 5.131881  | 1.196763  | O | -5.887841  | 5.135047  | 1.20209   |
| O | -8.639428  | -3.955681 | 0.059871  | O | -8.614129  | -3.982896 | 0.07654   |
| C | -5.509323  | 6.224107  | 0.354963  | C | -5.525551  | 6.231466  | 0.374358  |
| H | -5.878753  | 7.118074  | 0.858336  | H | -5.904168  | 7.123183  | 0.875073  |
| H | -4.423234  | 6.305905  | 0.223569  | H | -4.43685   | 6.312717  | 0.265509  |
| H | -5.986627  | 6.140396  | -0.629395 | H | -5.982266  | 6.154483  | -0.620362 |
| C | -9.881751  | -3.746862 | -0.596803 | C | -9.86544   | -3.779798 | -0.563782 |
| H | -9.7533    | -3.64543  | -1.681794 | H | -9.750713  | -3.667482 | -1.649315 |
| H | -10.483825 | -4.631789 | -0.387978 | H | -10.457278 | -4.671956 | -0.356088 |
| H | -10.398002 | -2.859088 | -0.210482 | H | -10.385518 | -2.900144 | -0.164004 |

**D8A2**

|   |           |           |           |
|---|-----------|-----------|-----------|
| C | 1.650005  | -0.549187 | 0.004825  |
| C | 0.847957  | -1.650626 | 0.162032  |
| H | 1.346731  | -2.580417 | 0.426343  |
| C | -0.598271 | -1.770581 | 0.047798  |
| C | -1.251187 | -2.813837 | 0.744998  |
| C | -1.401696 | -0.941003 | -0.770612 |
| C | -2.622477 | -2.987815 | 0.681627  |
| H | -0.661236 | -3.476209 | 1.371726  |
| C | -2.7717   | -1.105013 | -0.829852 |
| C | -3.421887 | -2.121795 | -0.092838 |
| H | -3.086231 | -3.772678 | 1.26836   |
| H | -3.3535   | -0.459831 | -1.480756 |
| C | 1.118374  | 0.83264   | -0.042279 |
| C | 1.578699  | 1.77494   | -0.97823  |
| C | 0.134384  | 1.271508  | 0.862591  |
| C | 1.060703  | 3.06258   | -1.04273  |
| C | -0.389187 | 2.552586  | 0.814444  |
| C | 0.043039  | 3.492007  | -0.155999 |
| H | 1.478135  | 3.740128  | -1.776295 |
| H | -1.163531 | 2.809267  | 1.525138  |
| C | 3.115101  | -0.72944  | -0.051467 |
| C | 4.003261  | 0.229887  | 0.472901  |
| C | 3.698768  | -1.877745 | -0.61827  |
| C | 5.3766    | 0.042405  | 0.463598  |
| C | 5.071977  | -2.073225 | -0.647144 |
| H | 3.059992  | -2.617061 | -1.092085 |
| C | 5.961321  | -1.122652 | -0.090424 |
| H | 6.002071  | 0.797569  | 0.923486  |
| H | 5.450088  | -2.95311  | -1.151763 |
| N | 7.341044  | -1.300982 | -0.080399 |

**D8Baz(r)A2**

|   |           |           |           |
|---|-----------|-----------|-----------|
| C | -4.379294 | -0.606319 | -0.070828 |
| C | -3.374836 | -1.522839 | -0.203066 |
| H | -3.688865 | -2.557552 | -0.324295 |
| C | -1.922395 | -1.359666 | -0.198759 |
| C | -1.133117 | -2.393782 | -0.747793 |
| C | -1.232855 | -0.274622 | 0.387237  |
| C | 0.25265   | -2.341778 | -0.739782 |
| H | -1.629166 | -3.247397 | -1.201999 |
| C | 0.151972  | -0.217383 | 0.386245  |
| C | 0.93589   | -1.244861 | -0.179803 |
| H | 0.814164  | -3.143222 | -1.209595 |
| H | 0.641235  | 0.616903  | 0.879449  |
| C | -4.169071 | 0.862893  | -0.148816 |
| C | -4.70953  | 1.734216  | 0.809793  |
| C | -3.453501 | 1.451493  | -1.205146 |
| C | -4.519659 | 3.110278  | 0.746601  |
| C | -3.259379 | 2.823264  | -1.284513 |
| C | -3.775226 | 3.701256  | -0.300381 |
| H | -4.987053 | 3.723043  | 1.50674   |
| H | -2.682386 | 3.214117  | -2.113718 |
| C | -5.769915 | -1.082368 | 0.109873  |
| C | -6.869422 | -0.379248 | -0.417689 |
| C | -6.0643   | -2.266603 | 0.809162  |
| C | -8.169759 | -0.844287 | -0.290106 |
| C | -7.362108 | -2.737127 | 0.957887  |
| H | -5.257436 | -2.811294 | 1.29044   |
| C | -8.462298 | -2.047002 | 0.397069  |
| H | -8.966913 | -0.278708 | -0.757022 |
| H | -7.515184 | -3.624925 | 1.558227  |
| N | -9.773969 | -2.504695 | 0.506092  |

|   |           |           |           |   |            |           |           |
|---|-----------|-----------|-----------|---|------------|-----------|-----------|
| N | -0.519782 | 4.76123   | -0.211821 | N | -3.545289  | 5.074442  | -0.38051  |
| C | 7.925903  | -2.554402 | -0.558188 | C | -10.052133 | -3.794859 | 1.136391  |
| C | 9.240797  | -2.930319 | 0.129545  | C | -11.296614 | -4.499866 | 0.590506  |
| H | 8.076808  | -2.528158 | -1.651319 | H | -10.14048  | -3.689854 | 2.231963  |
| H | 7.212049  | -3.354265 | -0.356071 | H | -9.199228  | -4.44897  | 0.949194  |
| H | 9.581552  | -3.897957 | -0.252208 | H | -11.400593 | -5.474303 | 1.07833   |
| H | 10.039208 | -2.207426 | -0.059268 | H | -12.217482 | -3.941773 | 0.781088  |
| H | 9.104364  | -3.018523 | 1.211279  | H | -11.210474 | -4.664444 | -0.487523 |
| C | 8.215208  | -0.121628 | -0.070293 | C | -10.873632 | -1.53313  | 0.472933  |
| C | 8.765816  | 0.260974  | 1.308969  | C | -11.577952 | -1.405194 | -0.883386 |
| H | 7.666525  | 0.724406  | -0.49766  | H | -10.487995 | -0.555945 | 0.782942  |
| H | 9.049061  | -0.313332 | -0.755729 | H | -11.604733 | -1.821191 | 1.237553  |
| H | 9.38825   | 1.159208  | 1.229596  | H | -12.368526 | -0.648474 | -0.828121 |
| H | 7.958673  | 0.468118  | 2.017125  | H | -10.877455 | -1.108727 | -1.66908  |
| H | 9.377727  | -0.540147 | 1.73096   | H | -12.033121 | -2.351308 | -1.186932 |
| C | -0.132103 | 5.713258  | -1.252502 | C | -4.004846  | 5.960209  | 0.688745  |
| C | -1.271624 | 6.623829  | -1.719324 | C | -3.137245  | 7.207052  | 0.879879  |
| H | 0.207593  | 5.147776  | -2.120462 | H | -3.976834  | 5.398843  | 1.623861  |
| H | 0.719754  | 6.330985  | -0.920186 | H | -5.054535  | 6.263457  | 0.529534  |
| H | -0.908032 | 7.271449  | -2.523606 | H | -3.522268  | 7.787101  | 1.724593  |
| H | -2.108303 | 6.034717  | -2.105921 | H | -2.10131   | 6.931474  | 1.098095  |
| H | -1.647407 | 7.272973  | -0.923845 | H | -3.141286  | 7.864345  | 0.005903  |
| C | -1.166264 | 5.318528  | 0.983037  | C | -3.333728  | 5.686135  | -1.698068 |
| C | -2.68618  | 5.124638  | 1.0447    | C | -1.865206  | 5.941619  | -2.058894 |
| H | -0.932236 | 6.388531  | 1.018993  | H | -3.885431  | 6.633138  | -1.725182 |
| H | -0.699092 | 4.881578  | 1.872152  | H | -3.796854  | 5.050369  | -2.460429 |
| H | -3.083226 | 5.567331  | 1.964789  | H | -1.792842  | 6.379659  | -3.060657 |
| H | -3.182552 | 5.602289  | 0.196071  | H | -1.395443  | 6.630054  | -1.351762 |
| H | -2.956561 | 4.065386  | 1.037152  | H | -1.286791  | 5.013534  | -2.050936 |
| H | -0.934059 | -0.167838 | -1.367226 | H | -1.79286   | 0.51822   | 0.867191  |
| H | -0.237489 | 0.589102  | 1.619419  | H | -3.036253  | 0.815596  | -1.979902 |
| H | 3.602379  | 1.129944  | 0.927454  | H | -6.696227  | 0.540696  | -0.966829 |
| H | 2.358428  | 1.490868  | -1.678823 | H | -5.297264  | 1.325086  | 1.626338  |
| C | -4.875012 | -2.279993 | -0.175917 | C | 2.415384   | -1.176372 | -0.177997 |
| C | -5.489174 | -3.522998 | -0.299419 | C | 3.113594   | -2.390802 | 0.028663  |
| C | -4.771112 | -4.745696 | -0.471545 | C | 4.477425   | -2.645118 | 0.070532  |
| N | -4.234737 | -5.76753  | -0.629302 | C | 2.996649   | 0.097189  | -0.383662 |
| C | -6.912145 | -3.662655 | -0.28677  | C | 5.557088   | -1.764933 | -0.075788 |
| N | -8.072395 | -3.76872  | -0.285051 | C | 4.331809   | 0.476506  | -0.429825 |
| C | -5.758092 | -1.119642 | -0.163869 | C | 5.487833   | -0.300856 | -0.296343 |
| C | -5.5402   | 0.107789  | 0.393286  | H | 4.751489   | -3.683751 | 0.249373  |
| H | -6.738544 | -1.254766 | -0.612155 | H | 2.288602   | 0.900528  | -0.559682 |
| C | -4.400396 | 0.510516  | 1.16669   | H | 4.506586   | 1.537089  | -0.605579 |
| N | -3.53981  | 0.924015  | 1.831409  | C | 6.908612   | -2.117339 | -0.030902 |
| C | -6.555207 | 1.11709   | 0.2727    | H | 7.288349   | -3.114033 | 0.140357  |
| N | -7.367372 | 1.943496  | 0.170723  | C | 7.681929   | -0.938765 | -0.194705 |
|   |           |           |           | C | 6.802739   | 0.167623  | -0.353806 |
|   |           |           |           | H | 7.095363   | 1.193516  | -0.533052 |
|   |           |           |           | H | 2.483658   | -3.25559  | 0.210302  |
|   |           |           |           | C | 9.130341   | -0.84084  | -0.250646 |
|   |           |           |           | C | 9.949344   | -1.83471  | -0.769196 |
|   |           |           |           | C | 9.464722   | -3.050563 | -1.341217 |
|   |           |           |           | N | 9.124471   | -4.055457 | -1.82126  |
|   |           |           |           | C | 11.373031  | -1.696726 | -0.77277  |
|   |           |           |           | N | 12.531288  | -1.572989 | -0.782019 |
|   |           |           |           | C | 9.803234   | 0.380136  | 0.204032  |
|   |           |           |           | C | 9.456256   | 1.173316  | 1.254473  |
|   |           |           |           | H | 10.711847  | 0.66201   | -0.321069 |
|   |           |           |           | C | 8.395867   | 0.917911  | 2.188957  |
|   |           |           |           | N | 7.59073    | 0.765572  | 3.01397   |
|   |           |           |           | C | 10.238965  | 2.344793  | 1.538362  |
|   |           |           |           | N | 10.86107   | 3.300998  | 1.763896  |

| D8BazA2 |           |           |           | D7A4 |           |           |           |
|---------|-----------|-----------|-----------|------|-----------|-----------|-----------|
| C       | 4.399794  | -0.61111  | 0.034455  | N    | 3.295508  | -0.130059 | -0.252199 |
| C       | 3.399438  | -1.525385 | 0.214156  | C    | 3.827631  | 1.202395  | -0.248902 |
| H       | 3.718622  | -2.539782 | 0.44504   | C    | 3.531933  | 2.09363   | -1.292616 |
| C       | 1.94816   | -1.378781 | 0.148606  | C    | 4.671911  | 1.615792  | 0.78374   |
| C       | 1.148107  | -2.355282 | 0.783705  | C    | 4.056464  | 3.377242  | -1.285891 |
| C       | 1.271507  | -0.366672 | -0.570274 | H    | 2.891834  | 1.772881  | -2.107917 |
| C       | -0.235363 | -2.304788 | 0.744712  | C    | 5.215879  | 2.900327  | 0.788926  |
| H       | 1.636556  | -3.163397 | 1.321898  | H    | 4.909531  | 0.926417  | 1.587307  |
| C       | -0.111373 | -0.325221 | -0.621038 | C    | 4.903911  | 3.791926  | -0.245811 |
| C       | -0.908678 | -1.282853 | 0.043637  | H    | 3.836672  | 4.076657  | -2.085165 |
| H       | -0.806247 | -3.080037 | 1.2452    | H    | 5.868373  | 3.194296  | 1.6017    |
| H       | -0.589203 | 0.474094  | -1.178146 | C    | 4.20756   | -1.232539 | -0.141193 |
| C       | 4.169995  | 0.856077  | -0.024386 | C    | 4.034502  | -2.212367 | 0.838983  |
| C       | 4.730141  | 1.650087  | -1.037255 | C    | 5.307036  | -1.318196 | -1.008745 |
| C       | 3.412875  | 1.521385  | 0.954967  | C    | 4.930407  | -3.276896 | 0.949079  |
| C       | 4.520514  | 3.023648  | -1.098233 | H    | 3.192298  | -2.148351 | 1.520123  |
| C       | 3.200284  | 2.891692  | 0.911546  | C    | 6.210008  | -2.36425  | -0.894336 |
| C       | 3.736608  | 3.689704  | -0.127903 | H    | 5.449684  | -0.557542 | -1.769177 |
| H       | 5.002559  | 3.577816  | -1.893717 | C    | 6.027439  | -3.356915 | 0.081978  |
| H       | 2.590882  | 3.342997  | 1.685088  | H    | 4.769033  | -4.023179 | 1.717271  |
| C       | 5.800936  | -1.081544 | -0.045444 | H    | 7.063424  | -2.442511 | -1.559173 |
| C       | 6.870176  | -0.314922 | 0.455625  | C    | -0.577325 | -0.199907 | -0.163301 |
| C       | 6.137179  | -2.325074 | -0.610832 | C    | -0.10542  | -1.441344 | -0.581223 |
| C       | 8.178861  | -0.773301 | 0.432797  | S    | 0.788338  | 0.884594  | 0.146185  |
| C       | 7.444241  | -2.791043 | -0.654402 | C    | 1.288526  | -1.534058 | -0.67555  |
| H       | 5.35766   | -2.925866 | -1.069865 | H    | -0.767594 | -2.259737 | -0.840411 |
| C       | 8.512164  | -2.035192 | -0.115718 | C    | 1.942603  | -0.353982 | -0.317824 |
| H       | 8.948585  | -0.153682 | 0.876484  | H    | 1.81929   | -2.418798 | -1.000478 |
| H       | 7.631919  | -3.732448 | -1.155266 | O    | 5.369571  | 5.06661   | -0.338583 |
| N       | 9.830196  | -2.486494 | -0.116344 | O    | 6.96374   | -4.344158 | 0.103701  |
| N       | 3.488921  | 5.061511  | -0.171227 | C    | 6.230902  | 5.549728  | 0.683731  |
| C       | 10.151454 | -3.831378 | -0.592514 | H    | 5.736607  | 5.544355  | 1.663086  |
| C       | 11.358182 | -4.466659 | 0.10321   | H    | 7.15599   | 4.962933  | 0.742527  |
| H       | 10.312492 | -3.836697 | -1.684712 | H    | 6.473899  | 6.576722  | 0.409542  |
| H       | 9.289202  | -4.470311 | -0.396815 | C    | 6.828426  | -5.382822 | 1.064468  |
| H       | 11.498856 | -5.483165 | -0.277904 | H    | 5.889353  | -5.934334 | 0.932189  |
| H       | 12.287663 | -3.920088 | -0.078686 | H    | 7.668297  | -6.05756  | 0.896241  |
| H       | 11.199129 | -4.525274 | 1.183887  | H    | 6.877314  | -4.993639 | 2.089061  |
| C       | 10.922529 | -1.506744 | -0.111316 | C    | -1.906207 | 0.273871  | 0.003415  |
| C       | 11.542528 | -1.242233 | 1.266404  | C    | -3.047139 | -0.478341 | -0.141924 |
| H       | 10.553686 | -0.56765  | -0.537716 | H    | -2.002231 | 1.321654  | 0.274717  |
| H       | 11.699495 | -1.861571 | -0.798827 | H    | -2.946083 | -1.529882 | -0.398263 |
| H       | 12.328143 | -0.482409 | 1.187547  | C    | -4.382071 | -0.028275 | 0.012616  |
| H       | 10.792565 | -0.884282 | 1.977268  | C    | -5.506882 | -0.826714 | -0.141048 |
| H       | 11.987139 | -2.149181 | 1.683841  | C    | -4.861479 | 1.37323   | 0.366902  |
| C       | 3.959758  | 5.856648  | -1.30465  | C    | -6.685133 | -0.027846 | 0.091174  |
| C       | 3.086581  | 7.075258  | -1.61406  | O    | -6.319098 | 1.233685  | 0.381674  |
| H       | 3.951053  | 5.216762  | -2.188517 | C    | -8.028076 | -0.345056 | 0.061339  |
| H       | 5.00464   | 6.181587  | -1.155958 | C    | -5.450621 | -2.20486  | -0.473461 |
| H       | 3.482006  | 7.585926  | -2.49786  | N    | -5.293157 | -3.326018 | -0.74723  |
| H       | 2.056633  | 6.773305  | -1.825058 | C    | -8.4994   | -1.655004 | -0.237877 |
| H       | 3.071414  | 7.802385  | -0.797707 | N    | -8.926368 | -2.71209  | -0.477679 |
| C       | 3.243434  | 5.781706  | 1.084345  | C    | -8.997113 | 0.664118  | 0.338489  |
| C       | 1.76614   | 6.058273  | 1.389259  | N    | -9.793137 | 1.483947  | 0.564326  |
| H       | 3.791621  | 6.730575  | 1.04396   | C    | -4.546171 | 2.423116  | -0.704928 |
| H       | 3.691084  | 5.214942  | 1.90773   | H    | -5.067105 | 3.353332  | -0.464116 |
| H       | 1.669646  | 6.575942  | 2.350169  | H    | -3.47414  | 2.626242  | -0.756196 |
| H       | 1.30968   | 6.684868  | 0.618675  | H    | -4.880759 | 2.079274  | -1.686494 |
| H       | 1.19083   | 5.129912  | 1.44396   | C    | -4.464412 | 1.823969  | 1.777621  |
| H       | 1.843673  | 0.384738  | -1.099941 | H    | -4.738515 | 1.064036  | 2.513199  |

|   |            |           |           |   |          |          |          |
|---|------------|-----------|-----------|---|----------|----------|----------|
| H | 2.977495   | 0.947003  | 1.766747  | H | -3.38915 | 2.002564 | 1.848469 |
| H | 6.66464    | 0.652337  | 0.902606  | H | -4.98917 | 2.751272 | 2.021139 |
| H | 5.348931   | 1.181298  | -1.796926 |   |          |          |          |
| C | -7.61328   | -1.013282 | -0.143314 |   |          |          |          |
| C | -6.932948  | -0.179113 | -1.057538 |   |          |          |          |
| C | -5.567514  | -0.020495 | -1.267308 |   |          |          |          |
| C | -7.054414  | -1.892172 | 0.806136  |   |          |          |          |
| C | -4.4944    | -0.630399 | -0.613655 |   |          |          |          |
| C | -5.717451  | -2.157115 | 1.089725  |   |          |          |          |
| C | -4.566265  | -1.64216  | 0.492521  |   |          |          |          |
| H | -5.295752  | 0.683629  | -2.051691 |   |          |          |          |
| H | -7.767949  | -2.423508 | 1.428357  |   |          |          |          |
| H | -5.546584  | -2.872423 | 1.892038  |   |          |          |          |
| C | -3.14346   | -0.412145 | -0.868755 |   |          |          |          |
| H | -2.760657  | 0.253884  | -1.630473 |   |          |          |          |
| C | -2.363523  | -1.224385 | 0.000506  |   |          |          |          |
| C | -3.252473  | -1.968071 | 0.822312  |   |          |          |          |
| H | -2.968543  | -2.657944 | 1.60577   |   |          |          |          |
| H | -7.568326  | 0.412145  | -1.711305 |   |          |          |          |
| C | -9.095615  | -0.971007 | -0.220578 |   |          |          |          |
| C | -9.843467  | -2.126207 | -0.385095 |   |          |          |          |
| C | -9.259529  | -3.416487 | -0.584091 |   |          |          |          |
| N | -8.840888  | -4.487505 | -0.765725 |   |          |          |          |
| C | -11.275056 | -2.108336 | -0.392105 |   |          |          |          |
| N | -12.439237 | -2.087338 | -0.4054   |   |          |          |          |
| C | -9.82428   | 0.286823  | -0.156076 |   |          |          |          |
| C | -9.413728  | 1.47013   | 0.387568  |   |          |          |          |
| H | -10.83855  | 0.279853  | -0.545321 |   |          |          |          |
| C | -8.178132  | 1.706891  | 1.076446  |   |          |          |          |
| N | -7.220875  | 1.979458  | 1.67845   |   |          |          |          |
| C | -10.297582 | 2.600855  | 0.340021  |   |          |          |          |
| N | -11.007404 | 3.521223  | 0.295878  |   |          |          |          |

**D7Baz(r)A4**

|   |           |           |           |
|---|-----------|-----------|-----------|
| N | 6.313214  | -0.194298 | -0.265429 |
| C | 6.683238  | 1.18672   | -0.357941 |
| C | 6.287675  | 1.965536  | -1.457505 |
| C | 7.470618  | 1.768021  | 0.638839  |
| C | 6.657281  | 3.299722  | -1.540876 |
| H | 5.691624  | 1.518472  | -2.246149 |
| C | 7.861048  | 3.104364  | 0.552659  |
| H | 7.785123  | 1.169051  | 1.48715   |
| C | 7.449379  | 3.880916  | -0.538122 |
| H | 6.357429  | 3.911768  | -2.384636 |
| H | 8.472367  | 3.52699   | 1.340581  |
| C | 7.341911  | -1.167088 | -0.038295 |
| C | 7.242026  | -2.086538 | 1.00859   |
| C | 8.479847  | -1.187896 | -0.859267 |
| C | 8.248653  | -3.027356 | 1.231414  |
| H | 6.369278  | -2.07202  | 1.6531    |
| C | 9.491625  | -2.109176 | -0.633432 |
| H | 8.566001  | -0.474323 | -1.67206  |
| C | 9.383417  | -3.041327 | 0.410734  |
| H | 8.142023  | -3.7283   | 2.050265  |
| H | 10.375738 | -2.134991 | -1.261344 |
| C | 2.464716  | -0.747625 | -0.300255 |
| C | 3.109263  | -1.929507 | -0.634645 |
| S | 3.679316  | 0.512157  | -0.007687 |
| C | 4.512695  | -1.855807 | -0.679121 |
| H | 2.578468  | -2.851565 | -0.837901 |
| C | 4.998643  | -0.593274 | -0.366937 |
| H | 5.156983  | -2.689124 | -0.92532  |

**D7BazA4**

|   |            |           |           |
|---|------------|-----------|-----------|
| N | -6.354265  | 0.17754   | -0.263526 |
| C | -6.718273  | -1.207127 | -0.293245 |
| C | -6.321204  | -2.031222 | -1.358947 |
| C | -7.496826  | -1.750154 | 0.731768  |
| C | -6.681524  | -3.370186 | -1.382208 |
| H | -5.730346  | -1.614981 | -2.1681   |
| C | -7.878035  | -3.09188  | 0.7057    |
| H | -7.811028  | -1.117406 | 1.555282  |
| C | -7.465431  | -3.912485 | -0.351677 |
| H | -6.380382  | -4.016562 | -2.19953  |
| H | -8.482503  | -3.484008 | 1.514457  |
| C | -7.380028  | 1.155409  | -0.053145 |
| C | -7.242344  | 2.141939  | 0.926699  |
| C | -8.553916  | 1.116966  | -0.821835 |
| C | -8.24697   | 3.088276  | 1.133931  |
| H | -6.341597  | 2.17544   | 1.530578  |
| C | -9.563386  | 2.044052  | -0.609593 |
| H | -8.669274  | 0.352786  | -1.583342 |
| C | -9.417955  | 3.041552  | 0.367267  |
| H | -8.110046  | 3.841655  | 1.900026  |
| H | -10.474567 | 2.023701  | -1.197797 |
| C | -2.519187  | 0.755348  | -0.379998 |
| C | -3.168196  | 1.902199  | -0.813124 |
| S | -3.71007   | -0.482251 | 0.039851  |
| C | -4.570968  | 1.80992   | -0.841255 |
| H | -2.629234  | 2.787332  | -1.130773 |
| C | -5.042051  | 0.574737  | -0.413434 |
| H | -5.228298  | 2.605634  | -1.165911 |

|   |            |           |           |   |            |           |           |
|---|------------|-----------|-----------|---|------------|-----------|-----------|
| O | 7.765353   | 5.192591  | -0.720389 | O | -7.772364  | -5.233738 | -0.475088 |
| O | 10.426393  | -3.907397 | 0.541466  | O | -10.463134 | 3.906988  | 0.49053   |
| C | 8.564129   | 5.837343  | 0.261899  | C | -8.561119  | -5.840461 | 0.538576  |
| H | 8.070192   | 5.845756  | 1.241569  | H | -8.063542  | -5.799939 | 1.515644  |
| H | 9.547932   | 5.361232  | 0.358287  | H | -9.5491    | -5.369681 | 0.617721  |
| H | 8.693997   | 6.863463  | -0.083621 | H | -8.682833  | -6.882423 | 0.240586  |
| C | 10.37668   | -4.870876 | 1.584263  | C | -10.374805 | 4.935614  | 1.466058  |
| H | 9.515981   | -5.542352 | 1.473449  | H | -9.526294  | 5.604016  | 1.272966  |
| H | 11.296804  | -5.450276 | 1.501307  | H | -11.303106 | 5.502761  | 1.389084  |
| H | 10.337428  | -4.395116 | 2.572213  | H | -10.285855 | 4.524806  | 2.47966   |
| C | 1.041971   | -0.476675 | -0.196059 | C | 4.088002   | -0.324124 | 0.075236  |
| C | 0.160631   | -1.457401 | -0.73864  | C | 3.234839   | -1.407803 | 0.401905  |
| C | 0.639452   | 0.729951  | 0.432297  | C | 3.6719     | 0.967347  | -0.347342 |
| C | -1.219176  | -1.50682  | -0.763217 | C | 1.849498   | -1.504943 | 0.407187  |
| H | 0.645824   | -2.294569 | -1.227621 | H | 3.751159   | -2.317734 | 0.700592  |
| C | -0.626712  | 1.243218  | 0.670619  | C | 2.401814   | 1.479641  | -0.535394 |
| H | 1.4472     | 1.35171   | 0.807725  | H | 4.469853   | 1.670776  | -0.560384 |
| C | -2.170223  | -0.589397 | -0.279137 | C | 0.890494   | -0.539251 | 0.084712  |
| H | -1.639925  | -2.389265 | -1.243485 | H | 1.45052    | -2.472678 | 0.706672  |
| C | -1.887434  | 0.705382  | 0.384116  | C | 1.148686   | 0.867212  | -0.360341 |
| H | -0.642749  | 2.209264  | 1.173842  | H | 2.362638   | 2.515064  | -0.869775 |
| C | -3.553534  | -0.728535 | -0.351302 | C | -0.492425  | -0.706761 | 0.11644   |
| C | -3.122796  | 1.289061  | 0.681118  | C | -0.087235  | 1.458726  | -0.570831 |
| H | -4.073852  | -1.571743 | -0.78725  | H | -1.004687  | -1.618174 | 0.398636  |
| C | -4.156351  | 0.421718  | 0.239467  | C | -1.114825  | 0.506034  | -0.282723 |
| H | -3.269417  | 2.24411   | 1.171697  | H | -0.243696  | 2.478752  | -0.896717 |
| C | -5.551996  | 0.704334  | 0.392268  | C | 5.505182   | -0.613285 | 0.199971  |
| C | -6.579486  | -0.112485 | 0.004525  | C | 6.563146   | 0.222338  | -0.02794  |
| H | -5.780924  | 1.656731  | 0.863596  | H | 5.723757   | -1.628639 | 0.517188  |
| H | -6.335006  | -1.063414 | -0.461842 | H | 6.381087   | 1.245221  | -0.343599 |
| C | -7.972082  | 0.14364   | 0.147794  | C | 7.94287    | -0.108659 | 0.108484  |
| C | -8.976313  | -0.719014 | -0.256213 | C | 8.9838     | 0.76971   | -0.134442 |
| C | -8.635956  | 1.372779  | 0.751968  | C | 8.550914   | -1.438561 | 0.532461  |
| C | -10.257665 | -0.124109 | 0.049199  | C | 10.237535  | 0.091378  | 0.106148  |
| O | -10.065465 | 1.074569  | 0.625387  | O | 9.991869   | -1.173173 | 0.487917  |
| C | -11.545597 | -0.575545 | -0.150562 | C | 11.542925  | 0.524388  | 0.007624  |
| C | -8.738038  | -1.977495 | -0.868766 | C | 8.801764   | 2.114728  | -0.551443 |
| N | -8.442936  | -2.989683 | -1.362934 | N | 8.549731   | 3.199771  | -0.890376 |
| C | -11.83411  | -1.833001 | -0.753927 | C | 11.884586  | 1.8486    | -0.39038  |
| N | -12.115226 | -2.852491 | -1.242314 | N | 12.207617  | 2.920693  | -0.711348 |
| C | -12.64701  | 0.234422  | 0.256988  | C | 12.608075  | -0.374531 | 0.312346  |
| N | -13.550415 | 0.890868  | 0.587706  | N | 13.481551  | -1.103872 | 0.560033  |
| C | -8.397423  | 2.658591  | -0.04793  | C | 8.299258   | -2.578859 | -0.461117 |
| H | -9.039458  | 3.451712  | 0.343678  | H | 8.90813    | -3.441934 | -0.180355 |
| H | -7.356678  | 2.981057  | 0.026669  | H | 7.248789   | -2.877309 | -0.46218  |
| H | -8.637484  | 2.503308  | -1.102439 | H | 8.573135   | -2.272376 | -1.473421 |
| C | -8.36932   | 1.544556  | 2.251815  | C | 8.236435   | -1.828221 | 1.981624  |
| H | -8.58696   | 0.617562  | 2.787595  | H | 8.472648   | -1.00457  | 2.659489  |
| H | -7.328109  | 1.81629   | 2.437963  | H | 7.181548   | -2.083661 | 2.102097  |
| H | -9.013658  | 2.335247  | 2.644509  | H | 8.840717   | -2.695009 | 2.260896  |

**D7A5**

|   |          |           |           |
|---|----------|-----------|-----------|
| C | 4.337419 | 1.734729  | -0.726061 |
| C | 3.645865 | 0.553752  | -0.987727 |
| C | 3.480609 | -0.380947 | 0.037402  |
| C | 4.03697  | -0.057703 | 1.277151  |
| C | 4.707775 | 1.155411  | 1.425055  |
| N | 4.850707 | 2.025217  | 0.449171  |
| F | 3.143614 | 0.323905  | -2.206105 |
| F | 4.488901 | 2.622574  | -1.709453 |
| F | 5.227642 | 1.461615  | 2.613215  |
| F | 3.92692  | -0.895244 | 2.312203  |

**D7Baz(r)A5**

|   |          |          |           |
|---|----------|----------|-----------|
| C | 7.64681  | 2.362686 | -0.962327 |
| C | 7.076152 | 1.095014 | -1.058004 |
| C | 6.995323 | 0.296231 | 0.084518  |
| C | 7.503171 | 0.83897  | 1.266215  |
| C | 8.049087 | 2.121415 | 1.246049  |
| N | 8.116228 | 2.861088 | 0.160666  |
| F | 6.615929 | 0.65165  | -2.233051 |
| F | 7.721017 | 3.119588 | -2.058351 |
| F | 8.523206 | 2.636635 | 2.380571  |
| F | 7.468411 | 0.141652 | 2.406428  |

|   |           |           |           |   |            |           |           |
|---|-----------|-----------|-----------|---|------------|-----------|-----------|
| C | 2.75135   | -1.670213 | -0.190041 | C | 6.387602   | -1.071936 | 0.03971   |
| C | 3.53697   | -2.816912 | -0.259484 | C | 7.270707   | -2.134108 | 0.101298  |
| C | 3.006372  | -4.128937 | -0.420011 | C | 6.88485    | -3.509439 | 0.106043  |
| N | 2.576063  | -5.204173 | -0.552695 | N | 6.608909   | -4.640858 | 0.111016  |
| C | 4.959486  | -2.737044 | -0.171357 | C | 8.683439   | -1.91518  | 0.168276  |
| N | 6.121495  | -2.682283 | -0.102898 | N | 9.835509   | -1.75273  | 0.218798  |
| C | 1.333425  | -1.601689 | -0.306459 | C | -0.331677  | -1.14802  | -0.352553 |
| C | 0.394667  | -2.568554 | -0.675574 | C | 0.329892   | -2.407048 | -0.444523 |
| S | 0.502011  | -0.064644 | 0.023775  | C | 0.306839   | 0.109151  | -0.177658 |
| C | -0.924582 | -2.112934 | -0.716968 | C | 1.676561   | -2.714352 | -0.41558  |
| H | 0.668914  | -3.581154 | -0.937972 | H | -0.324653  | -3.267585 | -0.526281 |
| C | -1.054497 | -0.766734 | -0.365599 | C | 1.650229   | 0.425604  | -0.063311 |
| H | -1.767537 | -2.726776 | -1.003649 | H | -0.357843  | 0.967581  | -0.149711 |
| N | -2.207563 | -0.035392 | -0.263688 | C | 2.793988   | -1.874013 | -0.263179 |
| C | -3.478106 | -0.694346 | -0.144221 | H | 1.911268   | -3.773704 | -0.508908 |
| C | -3.690745 | -1.670361 | 0.831497  | C | 2.778355   | -0.406426 | -0.095977 |
| C | -4.531897 | -0.335818 | -0.997893 | H | 1.864024   | 1.48652   | 0.059976  |
| C | -4.930312 | -2.300964 | 0.949941  | C | 4.123184   | -2.28945  | -0.231738 |
| H | -2.883623 | -1.944674 | 1.502825  | C | 4.106341   | 0.005542  | 0.021569  |
| C | -5.770356 | -0.947025 | -0.875361 | H | 4.45304    | -3.311523 | -0.335169 |
| H | -4.373418 | 0.426101  | -1.753862 | C | 4.951241   | -1.139536 | -0.056451 |
| C | -5.979942 | -1.93942  | 0.096014  | H | 4.431043   | 1.026961  | 0.166013  |
| H | -5.065764 | -3.056327 | 1.71406   | C | -1.780219  | -1.168794 | -0.439187 |
| H | -6.59347  | -0.680558 | -1.529485 | C | -2.611554  | -2.169774 | -0.922882 |
| C | -2.176882 | 1.400598  | -0.234477 | S | -2.766418  | 0.215871  | 0.060039  |
| C | -2.737403 | 2.089422  | 0.842542  | C | -3.981737  | -1.857125 | -0.929681 |
| C | -1.61442  | 2.124208  | -1.297681 | H | -2.233886  | -3.10291  | -1.323    |
| C | -2.73746  | 3.483991  | 0.873053  | C | -4.249813  | -0.588322 | -0.431704 |
| H | -3.180831 | 1.53161   | 1.660912  | H | -4.754666  | -2.519068 | -1.297044 |
| C | -1.597868 | 3.510351  | -1.267266 | N | -5.476939  | 0.007152  | -0.245795 |
| H | -1.19245  | 1.594746  | -2.14566  | C | -6.652276  | -0.799993 | -0.095082 |
| C | -2.160275 | 4.202578  | -0.18244  | C | -6.689544  | -1.849766 | 0.825871  |
| H | -3.178657 | 3.99399   | 1.720422  | C | -7.794675  | -0.52291  | -0.86181  |
| H | -1.165673 | 4.083656  | -2.080108 | C | -7.839203  | -2.626688 | 0.977043  |
| O | -7.227483 | -2.481476 | 0.126455  | H | -5.813375  | -2.06581  | 1.428258  |
| O | -2.099825 | 5.558718  | -0.255041 | C | -8.945533  | -1.280487 | -0.705083 |
| C | -7.501659 | -3.495232 | 1.084494  | H | -7.774149  | 0.292391  | -1.57731  |
| H | -8.540768 | -3.784567 | 0.924804  | C | -8.977606  | -2.34267  | 0.212285  |
| H | -6.856377 | -4.370774 | 0.94106   | H | -7.837928  | -3.434137 | 1.699093  |
| H | -7.383622 | -3.123663 | 2.109944  | H | -9.834506  | -1.076063 | -1.292033 |
| C | -2.643467 | 6.320627  | 0.815104  | C | -5.608141  | 1.43331   | -0.183752 |
| H | -2.133314 | 6.106261  | 1.762228  | C | -6.26521   | 2.030711  | 0.894075  |
| H | -2.483188 | 7.365819  | 0.549201  | C | -5.105305  | 2.244351  | -1.213807 |
| H | -3.718778 | 6.138437  | 0.9338    | C | -6.422112  | 3.415657  | 0.955982  |
|   |           |           |           | H | -6.661479  | 1.407827  | 1.68927   |
|   |           |           |           | C | -5.242205  | 3.622784  | -1.150312 |
|   |           |           |           | H | -4.608737  | 1.787086  | -2.063279 |
|   |           |           |           | C | -5.903594  | 4.221149  | -0.065897 |
|   |           |           |           | H | -6.93701   | 3.85088   | 1.803593  |
|   |           |           |           | H | -4.857718  | 4.260665  | -1.938804 |
|   |           |           |           | O | -10.152342 | -3.028301 | 0.282411  |
|   |           |           |           | O | -5.991755  | 5.578833  | -0.10495  |
|   |           |           |           | C | -10.246611 | -4.113323 | 1.194485  |
|   |           |           |           | H | -11.255126 | -4.512752 | 1.082417  |
|   |           |           |           | H | -9.518424  | -4.900506 | 0.962105  |
|   |           |           |           | H | -10.101878 | -3.78353  | 2.23093   |
|   |           |           |           | C | -6.646417  | 6.24495   | 0.966005  |
|   |           |           |           | H | -6.140781  | 6.064717  | 1.92284   |
|   |           |           |           | H | -6.600074  | 7.308583  | 0.730113  |
|   |           |           |           | H | -7.696732  | 5.9389    | 1.049886  |

D7BazA5

D8A3



|   |            |           |           |   |           |           |           |
|---|------------|-----------|-----------|---|-----------|-----------|-----------|
| C | 7.659539   | 2.115168  | -1.430162 | C | 2.667586  | -0.529075 | 0.1346    |
| C | 6.988815   | 0.907408  | -1.251506 | C | 1.668596  | -1.466378 | 0.166703  |
| C | 7.04027    | 0.272421  | -0.005466 | C | 0.222751  | -1.32166  | 0.077885  |
| C | 7.773673   | 0.920445  | 0.993927  | C | -0.446898 | -0.211175 | -0.494655 |
| C | 8.398408   | 2.13287   | 0.703635  | C | -0.583609 | -2.400051 | 0.513598  |
| N | 8.341557   | 2.710897  | -0.475966 | C | -1.824237 | -0.16226  | -0.590862 |
| F | 6.316958   | 0.357913  | -2.268224 | H | 0.133155  | 0.61511   | -0.885029 |
| F | 7.611293   | 2.70693   | -2.623482 | C | -1.961382 | -2.353177 | 0.424334  |
| F | 9.084122   | 2.747604  | 1.666005  | C | -2.631151 | -1.22868  | -0.117591 |
| F | 7.865517   | 0.400125  | 2.221517  | H | -2.281164 | 0.704032  | -1.050515 |
| C | 6.328311   | -1.018447 | 0.224544  | H | -2.549157 | -3.19588  | 0.779481  |
| C | 7.086318   | -2.114392 | 0.573592  | C | 4.070292  | -0.978735 | 0.001505  |
| C | 6.539576   | -3.375656 | 0.977355  | C | 5.128599  | -0.298443 | 0.630828  |
| N | 6.156159   | -4.416162 | 1.331191  | C | 4.418374  | -2.117534 | -0.750223 |
| C | 8.51841    | -2.061048 | 0.593695  | C | 6.443621  | -0.735316 | 0.544573  |
| N | 9.682027   | -2.03856  | 0.602771  | C | 5.726677  | -2.564623 | -0.84739  |
| C | 4.863532   | -1.030427 | 0.05886   | C | 6.787748  | -1.894075 | -0.19074  |
| C | 4.184659   | 0.127181  | 0.506689  | H | 7.207914  | -0.146554 | 1.035658  |
| C | 4.281598   | -2.174497 | -0.536966 | H | 5.924842  | -3.453665 | -1.43357  |
| C | 2.825519   | 0.413251  | 0.542898  | C | 2.428845  | 0.92631   | 0.284604  |
| H | 4.817644   | 0.90557   | 0.922058  | C | 3.022663  | 1.863486  | -0.579289 |
| C | 2.949689   | -2.467929 | -0.791797 | C | 1.621519  | 1.43897   | 1.313573  |
| H | 4.980551   | -2.928367 | -0.880711 | C | 2.781144  | 3.224864  | -0.461189 |
| C | 1.740939   | -0.360403 | 0.117351  | C | 1.390779  | 2.799753  | 1.460141  |
| H | 2.565902   | 1.380882  | 0.968731  | H | 1.181935  | 0.752589  | 2.030825  |
| C | 1.798566   | -1.719283 | -0.514076 | C | 1.944155  | 3.74132   | 0.558432  |
| H | 2.773185   | -3.422999 | -1.283076 | H | 3.226981  | 3.891216  | -1.189195 |
| C | 0.397613   | -0.004639 | 0.18655   | H | 0.800155  | 3.127764  | 2.305867  |
| C | 0.489698   | -2.093643 | -0.788968 | N | 1.693888  | 5.105678  | 0.652294  |
| H | 0.017909   | 0.925242  | 0.591293  | N | 8.093487  | -2.369243 | -0.28168  |
| C | -0.390051  | -1.054071 | -0.363708 | C | 0.74199   | 5.620852  | 1.637117  |
| H | 0.191833   | -3.027934 | -1.246397 | C | -0.00666  | 6.876893  | 1.183807  |
| C | -1.816127  | -1.081223 | -0.475867 | H | 1.241963  | 5.817351  | 2.601392  |
| C | -2.621346  | -2.049708 | -1.055403 | H | -0.004516 | 4.846659  | 1.818569  |
| S | -2.816495  | 0.24744   | 0.123071  | H | -0.723387 | 7.165577  | 1.959045  |
| C | -3.995409  | -1.749061 | -1.057167 | H | 0.657288  | 7.730287  | 1.0205    |
| H | -2.214973  | -2.952044 | -1.497696 | H | -0.56109  | 6.688017  | 0.260257  |
| C | -4.284226  | -0.528624 | -0.460082 | C | 2.671204  | 6.056899  | 0.111812  |
| H | -4.758855  | -2.387057 | -1.482416 | C | 2.347303  | 6.58802   | -1.290284 |
| N | -5.525514  | 0.03461   | -0.246605 | H | 3.658582  | 5.582339  | 0.109846  |
| C | -6.686295  | -0.801172 | -0.163744 | H | 2.74623   | 6.897314  | 0.811796  |
| C | -6.711477  | -1.914421 | 0.680227  | H | 3.135989  | 7.270589  | -1.626049 |
| C | -7.827399  | -0.493908 | -0.921207 | H | 2.269399  | 5.774261  | -2.016448 |
| C | -7.84635   | -2.722619 | 0.763444  | H | 1.399348  | 7.131556  | -1.301534 |
| H | -5.83643   | -2.155811 | 1.274488  | C | 9.167003  | -1.72905  | 0.478577  |
| C | -8.964375  | -1.282912 | -0.830538 | C | 10.293542 | -2.682008 | 0.886716  |
| H | -7.816527  | 0.369728  | -1.577823 | H | 8.733644  | -1.326173 | 1.395091  |
| C | -8.983211  | -2.407801 | 0.008721  | H | 9.590666  | -0.874904 | -0.077735 |
| H | -7.834767  | -3.579369 | 1.426172  | H | 11.026976 | -2.1347   | 1.487307  |
| H | -9.851638  | -1.054912 | -1.411451 | H | 9.906034  | -3.508466 | 1.489504  |
| C | -5.6824    | 1.449836  | -0.095733 | H | 10.824849 | -3.101979 | 0.028255  |
| C | -6.395686  | 1.965196  | 0.989296  | C | 8.491822  | -3.146396 | -1.461635 |
| C | -5.146988  | 2.336945  | -1.043842 | C | 8.492634  | -4.666821 | -1.261162 |
| C | -6.577716  | 3.340539  | 1.137107  | H | 9.493914  | -2.817253 | -1.760395 |
| H | -6.816232  | 1.285036  | 1.722582  | H | 7.83204   | -2.882794 | -2.295087 |
| C | -5.308501  | 3.706028  | -0.893425 | H | 8.780445  | -5.169396 | -2.191299 |
| H | -4.605123  | 1.946061  | -1.898591 | H | 9.19727   | -4.96594  | -0.481056 |
| C | -6.027613  | 4.220631  | 0.196752  | H | 7.503308  | -5.030756 | -0.970048 |
| H | -7.135939  | 3.709986  | 1.988694  | H | -0.103318 | -3.279308 | 0.933995  |
| H | -4.898814  | 4.400796  | -1.618667 | H | 3.644016  | -2.653673 | -1.290447 |
| O | -10.144708 | -3.120676 | 0.017618  | H | 3.66421   | 1.512782  | -1.382241 |
| O | -6.136832  | 5.577567  | 0.245222  | H | 4.91408   | 0.595171  | 1.20799   |

|   |            |           |          |   |           |           |           |
|---|------------|-----------|----------|---|-----------|-----------|-----------|
| C | -10.223871 | -4.268868 | 0.849662 | C | -4.069665 | -1.285068 | -0.156118 |
| H | -11.223123 | -4.679513 | 0.700435 | C | -5.027829 | -0.381496 | -0.56227  |
| H | -9.47802   | -5.023405 | 0.569465 | H | -4.47511  | -2.230723 | 0.193697  |
| H | -10.094074 | -4.010982 | 1.908326 | C | -4.687932 | 0.940157  | -0.994385 |
| C | -6.850909  | 6.158231  | 1.327029 | N | -4.410971 | 2.035517  | -1.277609 |
| H | -6.385498  | 5.920974  | 2.291922 | C | -6.454329 | -0.745023 | -0.50244  |
| H | -6.814405  | 7.236284  | 1.166397 | C | -7.376679 | -0.265235 | -1.410987 |
| H | -7.898071  | 5.830649  | 1.342265 | C | -6.892647 | -1.654603 | 0.588546  |

|   |           |           |           |
|---|-----------|-----------|-----------|
| C | -7.673529 | -2.790004 | 0.315627  |
| C | -6.527759 | -1.384538 | 1.920085  |
| C | -8.082368 | -3.630337 | 1.349153  |
| H | -7.94716  | -3.02024  | -0.708362 |
| C | -6.952777 | -2.217513 | 2.951515  |
| H | -5.925574 | -0.509353 | 2.141182  |
| C | -7.72863  | -3.343862 | 2.668371  |
| H | -8.678374 | -4.508676 | 1.121935  |
| H | -6.678878 | -1.987    | 3.976503  |
| H | -8.054436 | -3.996358 | 3.472858  |
| C | -7.021746 | 0.433295  | -2.609918 |
| N | -6.785633 | 0.958921  | -3.621347 |
| C | -8.78735  | -0.463085 | -1.250381 |
| N | -9.941363 | -0.587351 | -1.15872  |
| H | 1.991051  | -2.501067 | 0.263386  |

**D8Baz(r)A3**

|   |           |           |           |
|---|-----------|-----------|-----------|
| C | 5.61665   | -0.599743 | 0.134202  |
| C | 4.593971  | -1.498227 | 0.239621  |
| C | 3.144639  | -1.305537 | 0.193708  |
| C | 2.497049  | -0.21976  | -0.435773 |
| C | 2.317332  | -2.30912  | 0.741946  |
| C | 1.114106  | -0.13327  | -0.478709 |
| H | 3.088573  | 0.550369  | -0.915141 |
| C | 0.933266  | -2.226797 | 0.691924  |
| C | 0.291165  | -1.129911 | 0.086191  |
| H | 0.658464  | 0.700172  | -1.004443 |
| H | 0.340225  | -3.004751 | 1.162643  |
| C | 7.005853  | -1.09594  | -0.004769 |
| C | 8.098524  | -0.403403 | 0.545863  |
| C | 7.304401  | -2.292278 | -0.683677 |
| C | 9.400223  | -0.879801 | 0.45353   |
| C | 8.597806  | -2.782815 | -0.780481 |
| C | 9.69414   | -2.096612 | -0.204389 |
| H | 10.192199 | -0.277352 | 0.880151  |
| H | 8.755263  | -3.717632 | -1.304436 |
| C | 5.422926  | 0.872083  | 0.20916   |
| C | 5.990901  | 1.742032  | -0.736898 |
| C | 4.692952  | 1.463157  | 1.252022  |
| C | 5.802113  | 3.116504  | -0.675222 |
| C | 4.515776  | 2.838476  | 1.341054  |
| H | 4.271321  | 0.828733  | 2.025718  |
| C | 5.049807  | 3.712631  | 0.365383  |
| H | 6.227218  | 3.730721  | -1.459717 |
| H | 3.985881  | 3.228339  | 2.200756  |
| N | 4.858008  | 5.093221  | 0.405056  |
| N | 10.985797 | -2.613685 | -0.296743 |
| C | 4.002837  | 5.687588  | 1.432013  |
| C | 3.305755  | 6.977369  | 0.991439  |
| H | 4.569625  | 5.874745  | 2.360958  |
| H | 3.223559  | 4.964555  | 1.67779   |
| H | 2.653796  | 7.327325  | 1.798075  |
| H | 4.009259  | 7.784435  | 0.769197  |
| H | 2.689588  | 6.803898  | 0.10446   |

**D8BazA3**

|   |            |           |           |
|---|------------|-----------|-----------|
| C | -5.641286  | -0.603148 | -0.109987 |
| C | -4.61194   | -1.500078 | -0.169172 |
| C | -3.165476  | -1.303572 | -0.122809 |
| C | -2.520043  | -0.180584 | 0.444001  |
| C | -2.335369  | -2.341144 | -0.604238 |
| C | -1.139256  | -0.095999 | 0.49413   |
| H | -3.114402  | 0.620643  | 0.865064  |
| C | -0.953867  | -2.254182 | -0.557469 |
| C | -0.311782  | -1.123619 | -0.010944 |
| H | -0.68617   | 0.772319  | 0.961473  |
| H | -0.359666  | -3.065599 | -0.965012 |
| C | -7.027558  | -1.103379 | 0.039802  |
| C | -8.119092  | -0.44914  | -0.558292 |
| C | -7.324253  | -2.266272 | 0.775735  |
| C | -9.417553  | -0.932362 | -0.457737 |
| C | -8.614852  | -2.762154 | 0.88297   |
| C | -9.708854  | -2.116395 | 0.258261  |
| H | -10.210006 | -0.360313 | -0.923498 |
| H | -8.771995  | -3.670221 | 1.452402  |
| C | -5.459545  | 0.865107  | -0.247267 |
| C | -6.047437  | 1.768678  | 0.654329  |
| C | -4.724395  | 1.41897   | -1.306992 |
| C | -5.872733  | 3.141075  | 0.535566  |
| C | -4.561587  | 2.791071  | -1.453512 |
| H | -4.287033  | 0.756829  | -2.047996 |
| C | -5.116082  | 3.700174  | -0.522158 |
| H | -6.311513  | 3.783673  | 1.289199  |
| H | -4.026152  | 3.14966   | -2.323388 |
| N | -4.939587  | 5.079988  | -0.61918  |
| N | -10.997545 | -2.639884 | 0.359789  |
| C | -4.075914  | 5.639819  | -1.65825  |
| C | -3.396807  | 6.953204  | -1.261588 |
| H | -4.63178   | 5.783744  | -2.601394 |
| H | -3.287058  | 4.914717  | -1.863836 |
| H | -2.735951  | 7.275557  | -2.072496 |
| H | -4.110602  | 7.762182  | -1.083144 |
| H | -2.792441  | 6.822023  | -0.359381 |

|   |            |           |           |   |            |           |           |
|---|------------|-----------|-----------|---|------------|-----------|-----------|
| C | 5.862253   | 5.970883  | -0.207551 | C | -5.963785  | 5.971089  | -0.061465 |
| C | 5.500739   | 6.480138  | -1.608325 | C | -5.629123  | 6.550843  | 1.318434  |
| H | 6.8195     | 5.439583  | -0.241752 | H | -6.913896  | 5.428095  | -0.014169 |
| H | 6.01951    | 6.825494  | 0.46103   | H | -6.123975  | 6.790837  | -0.771919 |
| H | 6.309077   | 7.105414  | -2.003744 | H | -6.451516  | 7.182573  | 1.672497  |
| H | 5.340455   | 5.651271  | -2.303448 | H | -5.467745  | 5.758147  | 2.054397  |
| H | 4.585792   | 7.077915  | -1.590906 | H | -4.722237  | 7.160068  | 1.285499  |
| C | 12.098822  | -1.939482 | 0.370719  | C | -12.101543 | -2.017892 | -0.37009  |
| C | 13.221409  | -2.881018 | 0.81483   | C | -13.213329 | -2.993218 | -0.765595 |
| H | 11.707841  | -1.455236 | 1.266663  | H | -11.69665  | -1.595241 | -1.290921 |
| H | 12.518515  | -1.141627 | -0.266735 | H | -12.534643 | -1.179321 | 0.203097  |
| H | 13.986388  | -2.303463 | 1.343576  | H | -13.970462 | -2.458457 | -1.347907 |
| H | 12.840982  | -3.648268 | 1.49543   | H | -12.817876 | -3.805506 | -1.382353 |
| H | 13.71362   | -3.379449 | -0.02477  | H | -13.718902 | -3.432606 | 0.098765  |
| C | 11.324612  | -3.489803 | -1.424311 | C | -11.351633 | -3.438175 | 1.539437  |
| C | 11.293634  | -4.988754 | -1.101793 | C | -11.314272 | -4.956028 | 1.32281   |
| H | 12.323751  | -3.213819 | -1.781285 | H | -12.356294 | -3.140473 | 1.862255  |
| H | 10.643382  | -3.275012 | -2.254662 | H | -10.682386 | -3.165484 | 2.362484  |
| H | 11.531075  | -5.574035 | -1.997233 | H | -11.567736 | -5.476796 | 2.253049  |
| H | 12.020253  | -5.24332  | -0.32604  | H | -12.026549 | -5.26688  | 0.554185  |
| H | 10.307304  | -5.29742  | -0.744249 | H | -10.321416 | -5.287992 | 1.00651   |
| H | 2.780739   | -3.162797 | 1.22953   | H | -2.798864  | -3.226115 | -1.032483 |
| H | 6.502416   | -2.843896 | -1.164935 | H | -6.523159  | -2.785534 | 1.293116  |
| H | 6.575157   | 1.329229  | -1.554136 | H | -6.63531   | 1.384593  | 1.482864  |
| H | 7.924359   | 0.534317  | 1.063737  | H | -7.946102  | 0.462627  | -1.12098  |
| C | -1.186929  | -1.02985  | 0.03423   | C | 6.402985   | -0.631834 | 0.222023  |
| C | -1.745254  | 0.261001  | 0.197254  | C | 5.857434   | -1.917598 | -0.039073 |
| C | -3.071256  | 0.672303  | 0.192292  | C | 4.539565   | -2.33661  | -0.16249  |
| C | -1.904087  | -2.231021 | -0.173846 | C | 5.666727   | 0.55247   | 0.473709  |
| C | -4.243058  | -0.078994 | 0.030944  | C | 3.358711   | -1.598899 | -0.042766 |
| C | -3.2728    | -2.453849 | -0.264583 | C | 4.294332   | 0.758413  | 0.503132  |
| C | -4.335202  | -1.546987 | -0.18247  | C | 3.243979   | -0.140157 | 0.284406  |
| H | -1.024418  | 1.050236  | 0.385286  | H | 6.594071   | -2.704498 | -0.182247 |
| H | -3.228235  | 1.738527  | 0.349305  | H | 4.406379   | -3.393779 | -0.386791 |
| H | -1.288506  | -3.113473 | -0.316426 | H | 6.251292   | 1.436316  | 0.690779  |
| H | -3.562866  | -3.489388 | -0.438829 | H | 3.98761    | 1.77719   | 0.734213  |
| C | -5.542887  | 0.428842  | 0.046533  | C | 2.06056    | -2.083343 | -0.183698 |
| H | -5.80417   | 1.46755   | 0.18236   | H | 1.806648   | -3.113327 | -0.396486 |
| C | -6.448187  | -0.653865 | -0.150496 | C | 1.139781   | -1.024058 | 0.041837  |
| C | -5.692525  | -1.852761 | -0.29074  | C | 1.885142   | 0.154305  | 0.3296    |
| H | -6.109072  | -2.839758 | -0.452739 | H | 1.47309    | 1.135997  | 0.52159   |
| C | -7.87963   | -0.669095 | -0.217359 | C | 7.857196   | -0.622095 | 0.233045  |
| C | -8.79575   | 0.354462  | -0.117083 | C | 8.795557   | 0.381561  | 0.285342  |
| H | -8.307909  | -1.652515 | -0.390758 | H | 8.295045   | -1.615117 | 0.194104  |
| C | -8.367907  | 1.695545  | 0.144875  | C | 8.466657   | 1.774464  | 0.241007  |
| N | -8.001546  | 2.765737  | 0.421025  | N | 8.224296   | 2.908716  | 0.133907  |
| C | -10.237776 | 0.079717  | -0.227192 | C | 10.233525  | 0.03055   | 0.31463   |
| C | -11.127483 | 0.997611  | -0.748367 | C | 11.141373  | 0.764722  | 1.048196  |
| C | -10.727932 | -1.238519 | 0.253801  | C | 10.678808  | -1.140197 | -0.481968 |
| C | -11.562273 | -2.036044 | -0.547069 | C | 11.516366  | -2.121693 | 0.074829  |
| C | -10.358438 | -1.706835 | 1.527923  | C | 10.262887  | -1.280349 | -1.819176 |
| C | -12.018922 | -3.267817 | -0.082916 | C | 11.932937  | -3.209625 | -0.689202 |
| H | -11.839793 | -1.696111 | -1.538926 | H | 11.827308  | -2.039685 | 1.110522  |
| C | -10.830614 | -2.930843 | 1.994096  | C | 10.695253  | -2.360456 | -2.583411 |
| H | -9.71538   | -1.098437 | 2.155431  | H | 9.616581   | -0.528177 | -2.259541 |
| C | -11.659364 | -3.715484 | 1.189019  | C | 11.529364  | -3.328832 | -2.019847 |
| H | -12.655964 | -3.876754 | -0.716674 | H | 12.572839  | -3.964204 | -0.242746 |
| H | -10.551885 | -3.271827 | 2.986426  | H | 10.381714  | -2.445752 | -3.619259 |
| H | -12.021624 | -4.672852 | 1.551378  | H | 11.860901  | -4.17428  | -2.615071 |
| C | -10.731839 | 2.195354  | -1.426934 | C | 10.759876  | 1.768157  | 1.997101  |
| N | -10.46783  | 3.154748  | -2.030885 | N | 10.496178  | 2.554626  | 2.813476  |
| C | -12.547378 | 0.808485  | -0.689999 | C | 12.557381  | 0.560409  | 0.954217  |

|             |            |           |           |                   |           |           |           |
|-------------|------------|-----------|-----------|-------------------|-----------|-----------|-----------|
| N           | -13.706797 | 0.707917  | -0.65699  | N                 | 13.714302 | 0.441101  | 0.905742  |
| H           | 4.884277   | -2.538877 | 0.370092  | H                 | -4.898694 | -2.546239 | -0.257301 |
| <b>D8A5</b> |            |           |           | <b>D8Baz(r)A5</b> |           |           |           |
| C           | 2.30101    | -0.409422 | -0.013087 | C                 | 5.368105  | -0.582769 | 0.150333  |
| C           | 1.213782   | -1.240935 | -0.055406 | C                 | 4.314005  | -1.449606 | 0.203811  |
| C           | -0.200767  | -0.945978 | -0.240027 | C                 | 2.876556  | -1.210823 | 0.078651  |
| C           | -0.71162   | 0.227024  | -0.845891 | C                 | 2.30163   | -0.11893  | -0.608198 |
| C           | -1.143773  | -1.928027 | 0.14239   | C                 | 1.987204  | -2.173841 | 0.60236   |
| C           | -2.067946  | 0.407311  | -1.044354 | C                 | 0.927541  | 0.001602  | -0.745649 |
| H           | -0.029066  | 1.001121  | -1.171406 | H                 | 2.94361   | 0.635991  | -1.044752 |
| C           | -2.503059  | -1.739914 | -0.029067 | C                 | 0.611234  | -2.040012 | 0.487378  |
| C           | -3.008432  | -0.569244 | -0.639489 | C                 | 0.041263  | -0.946703 | -0.193515 |
| H           | -2.403392  | 1.329716  | -1.500484 | H                 | 0.528953  | 0.86736   | -1.265331 |
| H           | -3.186308  | -2.521427 | 0.286056  | H                 | -0.030494 | -2.817666 | 0.88982   |
| C           | 3.659335   | -0.990816 | -0.052132 | C                 | 6.746487  | -1.120541 | 0.084806  |
| C           | 4.739302   | -0.391914 | 0.621988  | C                 | 7.829031  | -0.460131 | 0.692268  |
| C           | 3.942805   | -2.179924 | -0.751937 | C                 | 7.043644  | -2.327034 | -0.576942 |
| C           | 6.009983   | -0.950439 | 0.627255  | C                 | 9.118355  | -0.976436 | 0.669848  |
| C           | 5.205858   | -2.749895 | -0.755598 | C                 | 8.324769  | -2.856487 | -0.605478 |
| C           | 6.286073   | -2.160581 | -0.052522 | C                 | 9.409248  | -2.203052 | 0.028614  |
| H           | 6.795425   | -0.417869 | 1.147969  | H                 | 9.904927  | -0.39796  | 1.137618  |
| H           | 5.351808   | -3.671455 | -1.305368 | H                 | 8.481582  | -3.796302 | -1.120584 |
| C           | 2.192111   | 1.062998  | 0.137061  | C                 | 5.213858  | 0.893989  | 0.215324  |
| C           | 2.891477   | 1.946185  | -0.703537 | C                 | 5.853512  | 1.746488  | -0.700395 |
| C           | 1.408395   | 1.639849  | 1.149279  | C                 | 4.44844   | 1.506307  | 1.219824  |
| C           | 2.774932   | 3.323523  | -0.577011 | C                 | 5.699413  | 3.125666  | -0.648344 |
| C           | 1.304717   | 3.015659  | 1.306576  | C                 | 4.30557   | 2.886034  | 1.300414  |
| H           | 0.886406   | 0.991538  | 1.846553  | H                 | 3.970834  | 0.88469   | 1.971055  |
| C           | 1.969284   | 3.907923  | 0.431139  | C                 | 4.912312  | 3.743799  | 0.353163  |
| H           | 3.298076   | 3.951465  | -1.287428 | H                 | 6.180041  | 3.727068  | -1.410292 |
| H           | 0.726652   | 3.389634  | 2.141732  | H                 | 3.743654  | 3.291223  | 2.132155  |
| N           | 1.852419   | 5.290611  | 0.536545  | N                 | 4.757107  | 5.129157  | 0.382961  |
| N           | 7.54277    | -2.757648 | -0.04831  | N                 | 10.687115 | -2.759042 | 0.005513  |
| C           | 0.947836   | 5.885536  | 1.520897  | C                 | 3.871633  | 5.749038  | 1.368565  |
| C           | 0.339619   | 7.220356  | 1.082375  | C                 | 3.228689  | 7.054851  | 0.893998  |
| H           | 1.453354   | 6.013411  | 2.493766  | H                 | 4.400879  | 5.925036  | 2.32147   |
| H           | 0.122948   | 5.190351  | 1.681677  | H                 | 3.063647  | 5.047382  | 1.580802  |
| H           | -0.353025  | 7.569681  | 1.854636  | H                 | 2.553104  | 7.426084  | 1.671182  |
| H           | 1.090798   | 8.002485  | 0.941846  | H                 | 3.962511  | 7.84165   | 0.698622  |
| H           | -0.218827  | 7.106892  | 0.148715  | H                 | 2.645616  | 6.89405   | -0.017506 |
| C           | 2.935116   | 6.143511  | 0.03254   | C                 | 5.813328  | 5.977733  | -0.181425 |
| C           | 2.696975   | 6.724946  | -1.366457 | C                 | 5.534402  | 6.490405  | -1.599594 |
| H           | 3.86834    | 5.569977  | 0.042593  | H                 | 6.757146  | 5.421947  | -0.166623 |
| H           | 3.080837   | 6.961673  | 0.747429  | H                 | 5.959352  | 6.830682  | 0.491723  |
| H           | 3.556354   | 7.330826  | -1.674623 | H                 | 6.373676  | 7.099416  | -1.953708 |
| H           | 2.554738   | 5.934113  | -2.108196 | H                 | 5.394363  | 5.663319  | -2.301202 |
| H           | 1.80776    | 7.359964  | -1.387029 | H                 | 4.631069  | 7.105017  | -1.629395 |
| C           | 8.631861   | -2.192149 | 0.748432  | C                 | 11.781046 | -2.122045 | 0.738181  |
| C           | 9.622071   | -3.232947 | 1.278047  | C                 | 12.847972 | -3.099605 | 1.23793   |
| H           | 8.192066   | -1.69379  | 1.613032  | H                 | 11.355318 | -1.630123 | 1.613942  |
| H           | 9.178058   | -1.421113 | 0.178105  | H                 | 12.259689 | -1.334499 | 0.130148  |
| H           | 10.373237  | -2.731251 | 1.896322  | H                 | 13.599282 | -2.548525 | 1.812482  |
| H           | 9.112247   | -3.977533 | 1.896326  | H                 | 12.407014 | -3.858394 | 1.890927  |
| H           | 10.155359  | -3.755613 | 0.479282  | H                 | 13.370862 | -3.608412 | 0.423476  |
| C           | 7.924254   | -3.639332 | -1.157835 | C                 | 11.061151 | -3.644222 | -1.103825 |
| C           | 7.743539   | -5.136567 | -0.879423 | C                 | 10.962522 | -5.142173 | -0.790105 |
| H           | 8.973265   | -3.43752  | -1.403288 | H                 | 12.087911 | -3.400881 | -1.400985 |
| H           | 7.351713   | -3.354387 | -2.047005 | H                 | 10.436717 | -3.405001 | -1.971385 |
| H           | 8.026913   | -5.721661 | -1.761355 | H                 | 11.2341   | -5.732269 | -1.672551 |
| H           | 8.36368    | -5.462734 | -0.04064  | H                 | 11.632769 | -5.422642 | 0.02643   |
| H           | 6.704568   | -5.372803 | -0.633492 | H                 | 9.947201  | -5.420027 | -0.493775 |

|   |           |           |           |   |            |           |           |
|---|-----------|-----------|-----------|---|------------|-----------|-----------|
| H | -0.788325 | -2.850909 | 0.592047  | H | 2.39513    | -3.045364 | 1.107487  |
| H | 3.156009  | -2.65889  | -1.326776 | H | 6.251664   | -2.854916 | -1.099614 |
| H | 3.518221  | 1.543189  | -1.493676 | H | 6.466971   | 1.316535  | -1.486852 |
| H | 4.577434  | 0.535343  | 1.161816  | H | 7.65625    | 0.483666  | 1.199444  |
| C | -4.447174 | -0.413422 | -0.823434 | C | -1.426727  | -0.806182 | -0.336596 |
| C | -5.067212 | 0.353999  | -1.78837  | C | -1.903997  | -0.283996 | -1.563974 |
| C | -5.33656  | -1.154229 | 0.122651  | C | -3.200974  | -0.032252 | -1.987684 |
| C | -6.17928  | -2.188311 | -0.295004 | C | -2.219336  | -1.207071 | 0.764673  |
| C | -5.353485 | -0.848143 | 1.487011  | C | -4.417107  | -0.234974 | -1.320795 |
| C | -6.971305 | -2.844296 | 0.646696  | C | -3.599146  | -1.201181 | 0.926408  |
| C | -6.192198 | -1.56593  | 2.336719  | C | -4.601714  | -0.783594 | 0.043579  |
| C | -4.389022 | 1.02849   | -2.852445 | H | -1.136274  | -0.07558  | -2.301969 |
| N | -3.889628 | 1.588171  | -3.742975 | H | -3.291315  | 0.369297  | -2.995959 |
| C | -6.490621 | 0.514128  | -1.808987 | H | -1.661013  | -1.54457  | 1.631916  |
| N | -7.644847 | 0.663921  | -1.834134 | H | -3.954195  | -1.56244  | 1.89078   |
| H | 1.420135  | -2.303562 | 0.052989  | C | -5.682771  | 0.042934  | -1.837892 |
| F | -4.583222 | 0.130193  | 1.97506   | H | -5.870561  | 0.461011  | -2.814503 |
| F | -6.224733 | -2.556788 | -1.578844 | C | -6.655585  | -0.301301 | -0.855273 |
| F | -6.205659 | -1.261497 | 3.634845  | C | -5.97543   | -0.802555 | 0.291341  |
| F | -7.762157 | -3.836533 | 0.240597  | H | -6.439023  | -1.159709 | 1.20066   |
| N | -6.975402 | -2.539534 | 1.925831  | C | -8.09439   | -0.191282 | -0.937413 |
|   |           |           |           | C | -8.837156  | 0.14388   | -2.051804 |
|   |           |           |           | C | -8.864553  | -0.475884 | 0.314507  |
|   |           |           |           | C | -9.613465  | -1.64409  | 0.469722  |
|   |           |           |           | C | -8.862661  | 0.415816  | 1.389379  |
|   |           |           |           | C | -10.302237 | -1.85675  | 1.662952  |
|   |           |           |           | C | -9.592028  | 0.101543  | 2.534412  |
|   |           |           |           | C | -8.287537  | 0.412113  | -3.343536 |
|   |           |           |           | N | -7.879611  | 0.639176  | -4.41015  |
|   |           |           |           | C | -10.263599 | 0.249693  | -1.984695 |
|   |           |           |           | N | -11.423213 | 0.345991  | -1.945767 |
|   |           |           |           | H | 4.563934   | -2.498016 | 0.354052  |
|   |           |           |           | F | -8.172766  | 1.559883  | 1.32344   |
|   |           |           |           | F | -9.67189   | -2.551191 | -0.510363 |
|   |           |           |           | F | -9.585915  | 0.958606  | 3.556153  |
|   |           |           |           | F | -11.007422 | -2.978265 | 1.806871  |
|   |           |           |           | N | -10.288542 | -1.006372 | 2.666019  |

**D8BazA5**

|   |           |           |           |
|---|-----------|-----------|-----------|
| C | 5.393985  | -0.614142 | 0.097686  |
| C | 4.323278  | -1.462276 | 0.121682  |
| C | 2.890103  | -1.194487 | 0.025894  |
| C | 2.323176  | -0.046881 | -0.573973 |
| C | 1.992229  | -2.180895 | 0.491714  |
| C | 0.95089   | 0.109294  | -0.669422 |
| H | 2.972305  | 0.716705  | -0.98396  |
| C | 0.618979  | -2.021554 | 0.400732  |
| C | 0.055375  | -0.866041 | -0.178146 |
| H | 0.559529  | 0.99392   | -1.161264 |
| H | -0.029299 | -2.795896 | 0.797896  |
| C | 6.761413  | -1.175222 | 0.001113  |
| C | 7.858219  | -0.561764 | 0.631795  |
| C | 7.033631  | -2.357811 | -0.712616 |
| C | 9.137318  | -1.101293 | 0.582974  |
| C | 8.304509  | -2.909995 | -0.767867 |
| C | 9.402427  | -2.305006 | -0.109935 |
| H | 9.936489  | -0.55821  | 1.071347  |
| H | 8.442446  | -3.830364 | -1.322321 |
| C | 5.272012  | 0.861642  | 0.226384  |
| C | 5.916534  | 1.737054  | -0.663862 |
| C | 4.537508  | 1.448284  | 1.268469  |
| C | 5.796034  | 3.116014  | -0.551667 |

**D6A2**

|   |           |           |           |
|---|-----------|-----------|-----------|
| N | -1.598594 | -0.05416  | -0.276995 |
| C | -0.224263 | -0.258001 | -0.301044 |
| C | 0.633532  | 0.656257  | -0.95769  |
| C | 0.362162  | -1.376114 | 0.338115  |
| C | 2.002065  | 0.48289   | -0.930484 |
| H | 0.209326  | 1.50055   | -1.487062 |
| C | 1.731899  | -1.553632 | 0.338035  |
| H | -0.268235 | -2.082726 | 0.863769  |
| C | 2.594985  | -0.61974  | -0.275035 |
| H | 2.629538  | 1.196503  | -1.455171 |
| H | 2.147777  | -2.398781 | 0.87493   |
| C | -2.148129 | 1.264128  | -0.383956 |
| C | -1.672751 | 2.305228  | 0.419791  |
| C | -3.198675 | 1.518961  | -1.279609 |
| C | -2.218405 | 3.586269  | 0.324601  |
| H | -0.86403  | 2.120446  | 1.119976  |
| C | -3.756793 | 2.785381  | -1.366532 |
| H | -3.575349 | 0.715278  | -1.903739 |
| C | -3.268857 | 3.832354  | -0.56827  |
| H | -1.826369 | 4.372398  | 0.958071  |
| H | -4.568394 | 2.993967  | -2.055327 |
| C | -2.503032 | -1.143846 | -0.067492 |
| C | -3.483438 | -1.070911 | 0.92505   |

|   |            |           |           |   |           |           |           |
|---|------------|-----------|-----------|---|-----------|-----------|-----------|
| C | 4.429416   | 2.826486  | 1.409375  | C | -2.438346 | -2.289881 | -0.877502 |
| H | 4.056344   | 0.806692  | 2.000351  | C | -4.388317 | -2.115905 | 1.115807  |
| C | 5.041195   | 3.708948  | 0.48874   | H | -3.542924 | -0.187626 | 1.552369  |
| H | 6.277194   | 3.737946  | -1.296744 | C | -3.323083 | -3.33979  | -0.682854 |
| H | 3.89077    | 3.209147  | 2.266853  | H | -1.688354 | -2.351787 | -1.659349 |
| N | 4.920573   | 5.095738  | 0.579111  | C | -4.308473 | -3.261572 | 0.314247  |
| N | 10.669764  | -2.884831 | -0.158816 | H | -5.138357 | -2.028882 | 1.892317  |
| C | 4.064259   | 5.694258  | 1.602484  | H | -3.280526 | -4.229596 | -1.30166  |
| C | 3.44517    | 7.032553  | 1.190763  | O | -3.880096 | 5.038086  | -0.735807 |
| H | 4.610775   | 5.819839  | 2.553719  | C | -3.428707 | 6.136707  | 0.043959  |
| H | 3.243546   | 5.002756  | 1.798578  | H | -4.043837 | 6.987256  | -0.251817 |
| H | 2.787892   | 7.386461  | 1.991426  | H | -3.560626 | 5.951289  | 1.11726   |
| H | 4.194262   | 7.810204  | 1.017789  | H | -2.374444 | 6.366521  | -0.154657 |
| H | 2.847679   | 6.92197   | 0.281166  | O | -5.132018 | -4.341113 | 0.416965  |
| C | 5.992652   | 5.940907  | 0.040196  | C | -6.142495 | -4.327331 | 1.415377  |
| C | 5.709105   | 6.530686  | -1.346793 | H | -6.852073 | -3.504629 | 1.261224  |
| H | 6.91954    | 5.357926  | 0.012122  | H | -6.669152 | -5.277667 | 1.321901  |
| H | 6.174188   | 6.754794  | 0.752249  | H | -5.713844 | -4.249446 | 2.422355  |
| H | 6.562817   | 7.128462  | -1.685343 | C | 4.047069  | -0.778449 | -0.250617 |
| H | 5.53087    | 5.743505  | -2.084817 | C | 4.674426  | -2.002334 | -0.464502 |
| H | 4.826579   | 7.175424  | -1.332404 | C | 4.916619  | 0.368008  | -0.008893 |
| C | 11.772683  | -2.303945 | 0.60565   | C | 4.629298  | 1.504358  | 0.690965  |
| C | 12.823402  | -3.323014 | 1.054315  | H | 5.933747  | 0.295876  | -0.384101 |
| H | 11.35328   | -1.851408 | 1.505472  | C | 3.973048  | -3.185075 | -0.850628 |
| H | 12.265093  | -1.493318 | 0.040073  | N | 3.443727  | -4.168465 | -1.181659 |
| H | 13.582057  | -2.815045 | 1.658257  | C | 6.089583  | -2.154757 | -0.331646 |
| H | 12.368924  | -4.108285 | 1.66545   | N | 7.244793  | -2.268191 | -0.231352 |
| H | 13.340097  | -3.796424 | 0.214845  | C | 3.412476  | 1.779501  | 1.401759  |
| C | 11.031183  | -3.713422 | -1.315035 | N | 2.473314  | 2.071572  | 2.022932  |
| C | 10.916085  | -5.225045 | -1.082879 | C | 5.630753  | 2.527372  | 0.806394  |
| H | 12.060062  | -3.465764 | -1.601901 | N | 6.433634  | 3.364218  | 0.894986  |
| H | 10.407167  | -3.421065 | -2.166435 |   |           |           |           |
| H | 11.181601  | -5.769137 | -1.99624  |   |           |           |           |
| H | 11.582753  | -5.557288 | -0.282938 |   |           |           |           |
| H | 9.897514   | -5.507474 | -0.802336 |   |           |           |           |
| H | 2.39445    | -3.083613 | 0.944079  |   |           |           |           |
| H | 6.230053   | -2.847926 | -1.254028 |   |           |           |           |
| H | 6.50622    | 1.326564  | -1.4784   |   |           |           |           |
| H | 7.70499    | 0.362919  | 1.178882  |   |           |           |           |
| C | -6.602199  | -0.046158 | -0.64263  |   |           |           |           |
| C | -6.150426  | -1.336827 | -0.282668 |   |           |           |           |
| C | -4.856014  | -1.817858 | -0.12033  |   |           |           |           |
| C | -5.810953  | 1.09882   | -0.87608  |   |           |           |           |
| C | -3.636914  | -1.147113 | -0.243221 |   |           |           |           |
| C | -4.427383  | 1.245637  | -0.850468 |   |           |           |           |
| C | -3.435491  | 0.29668   | -0.596884 |   |           |           |           |
| H | -6.929072  | -2.079979 | -0.138945 |   |           |           |           |
| H | -4.781983  | -2.871715 | 0.142805  |   |           |           |           |
| H | -6.357354  | 2.013101  | -1.078846 |   |           |           |           |
| H | -4.066358  | 2.250809  | -1.060565 |   |           |           |           |
| C | -2.370368  | -1.694091 | -0.055702 |   |           |           |           |
| H | -2.177166  | -2.730211 | 0.188679  |   |           |           |           |
| C | -1.387721  | -0.689407 | -0.275395 |   |           |           |           |
| C | -2.060042  | 0.518614  | -0.604007 |   |           |           |           |
| H | -1.591948  | 1.47368   | -0.801769 |   |           |           |           |
| C | -8.068468  | 0.105582  | -0.765566 |   |           |           |           |
| C | -8.690618  | 0.834945  | -1.750472 |   |           |           |           |
| C | -8.919097  | -0.57777  | 0.250121  |   |           |           |           |
| C | -9.862558  | -1.554789 | -0.085205 |   |           |           |           |
| C | -8.789033  | -0.277609 | 1.611124  |   |           |           |           |
| C | -10.604913 | -2.161244 | 0.927808  |   |           |           |           |
| C | -9.590594  | -0.942394 | 2.536181  |   |           |           |           |

|   |            |           |           |
|---|------------|-----------|-----------|
| C | -8.007347  | 1.419242  | -2.867128 |
| N | -7.513197  | 1.901371  | -3.803865 |
| C | -10.108703 | 1.047549  | -1.749636 |
| N | -11.255845 | 1.242154  | -1.75655  |
| H | 4.556371   | -2.520609 | 0.221805  |
| F | -7.917738  | 0.648963  | 2.022537  |
| F | -10.044383 | -1.922916 | -1.356906 |
| F | -9.464824  | -0.642555 | 3.82841   |
| F | -11.491682 | -3.098538 | 0.598787  |
| N | -10.470809 | -1.860796 | 2.200735  |

**D6Baz(r)A2**

|   |           |           |           |
|---|-----------|-----------|-----------|
| N | -4.768809 | -0.014563 | -0.107871 |
| C | -3.370951 | -0.042354 | -0.135724 |
| C | -2.634684 | 0.915428  | -0.866119 |
| C | -2.647558 | -1.032115 | 0.563889  |
| C | -1.249931 | 0.883598  | -0.883854 |
| H | -3.160631 | 1.672079  | -1.43627  |
| C | -1.263375 | -1.064281 | 0.519758  |
| H | -3.181581 | -1.764529 | 1.15764   |
| C | -0.51686  | -0.107894 | -0.199103 |
| H | -0.72498  | 1.613986  | -1.491446 |
| H | -0.746125 | -1.81856  | 1.104186  |
| C | -5.488061 | 1.203     | -0.319216 |
| C | -5.188933 | 2.352373  | 0.418257  |
| C | -6.531399 | 1.25498   | -1.258014 |
| C | -5.896435 | 3.539421  | 0.218362  |
| H | -4.392335 | 2.321895  | 1.154743  |
| C | -7.252119 | 2.424393  | -1.448768 |
| H | -6.774773 | 0.367725  | -1.833227 |
| C | -6.93845  | 3.579587  | -0.7158   |
| H | -5.636971 | 4.412701  | 0.804508  |
| H | -8.060067 | 2.472786  | -2.171061 |
| C | -5.52263  | -1.204991 | 0.136965  |
| C | -6.523229 | -1.222391 | 1.111933  |
| C | -5.294814 | -2.367347 | -0.619317 |
| C | -7.289259 | -2.36784  | 1.336216  |
| H | -6.710317 | -0.328501 | 1.697977  |
| C | -6.038122 | -3.51551  | -0.389759 |
| H | -4.529096 | -2.363119 | -1.3883   |
| C | -7.04526  | -3.525619 | 0.588027  |
| H | -8.059692 | -2.346695 | 2.09748   |
| H | -5.869315 | -4.417174 | -0.968849 |
| O | -7.701881 | 4.676914  | -0.984369 |
| C | -7.434873 | 5.873689  | -0.26869  |
| H | -8.151376 | 6.609612  | -0.635508 |
| H | -7.57638  | 5.739408  | 0.811249  |
| H | -6.416482 | 6.237906  | -0.454696 |
| O | -7.724111 | -4.699911 | 0.725858  |
| C | -8.757225 | -4.769528 | 1.697288  |
| H | -9.557428 | -4.048104 | 1.488777  |
| H | -9.160681 | -5.780891 | 1.635101  |
| H | -8.372337 | -4.596284 | 2.710242  |
| C | 0.960196  | -0.144129 | -0.23309  |
| C | 1.571535  | -1.422627 | -0.241748 |
| C | 2.912755  | -1.776838 | -0.263928 |
| C | 1.634992  | 1.100924  | -0.253804 |
| C | 4.053993  | -0.96479  | -0.298267 |
| C | 2.993179  | 1.385139  | -0.28751  |
| C | 4.09079   | 0.515941  | -0.300145 |
| H | 0.88162   | -2.259776 | -0.268955 |
| H | 3.1102    | -2.847714 | -0.275965 |

**D6BazA2**

|   |           |           |           |
|---|-----------|-----------|-----------|
| N | -4.788044 | -0.020023 | -0.123665 |
| C | -3.389238 | -0.061912 | -0.145792 |
| C | -2.642042 | 0.89468   | -0.867749 |
| C | -2.679158 | -1.063337 | 0.552111  |
| C | -1.259055 | 0.84922   | -0.880719 |
| H | -3.160177 | 1.663858  | -1.428347 |
| C | -1.295879 | -1.099846 | 0.524347  |
| H | -3.224909 | -1.80152  | 1.127877  |
| C | -0.53697  | -0.146504 | -0.187825 |
| H | -0.723837 | 1.588442  | -1.46753  |
| H | -0.788423 | -1.870266 | 1.095435  |
| C | -5.491485 | 1.211806  | -0.297006 |
| C | -5.159485 | 2.341739  | 0.456744  |
| C | -6.551436 | 1.299705  | -1.214646 |
| C | -5.850559 | 3.543726  | 0.293389  |
| H | -4.349535 | 2.283986  | 1.176679  |
| C | -7.255749 | 2.484443  | -1.368697 |
| H | -6.820155 | 0.428645  | -1.80313  |
| C | -6.909058 | 3.619653  | -0.619697 |
| H | -5.565058 | 4.400799  | 0.891286  |
| H | -8.075798 | 2.560451  | -2.074829 |
| C | -5.554164 | -1.207316 | 0.091857  |
| C | -6.566209 | -1.23426  | 1.055085  |
| C | -5.325442 | -2.358696 | -0.681047 |
| C | -7.342537 | -2.377879 | 1.25112   |
| H | -6.753443 | -0.349516 | 1.654733  |
| C | -6.079521 | -3.505019 | -0.479559 |
| H | -4.550661 | -2.347046 | -1.440754 |
| C | -7.097997 | -3.5245   | 0.486205  |
| H | -8.121131 | -2.364139 | 2.004234  |
| H | -5.910106 | -4.397928 | -1.071896 |
| O | -7.658628 | 4.735007  | -0.852238 |
| C | -7.355279 | 5.913117  | -0.120486 |
| H | -8.06452  | 6.668991  | -0.459946 |
| H | -7.478649 | 5.761916  | 0.959484  |
| H | -6.333821 | 6.261603  | -0.319476 |
| O | -7.786868 | -4.696282 | 0.596348  |
| C | -8.83176  | -4.774111 | 1.554126  |
| H | -9.624048 | -4.043088 | 1.348589  |
| H | -9.242175 | -5.781151 | 1.470356  |
| H | -8.457814 | -4.620724 | 2.574417  |
| C | 6.17253   | -0.319708 | -0.254515 |
| C | 5.575255  | 0.855108  | -0.763075 |
| C | 4.230579  | 1.178298  | -0.901934 |
| C | 5.527861  | -1.458838 | 0.269161  |
| C | 3.100005  | 0.437219  | -0.548203 |
| C | 4.169285  | -1.712082 | 0.43376   |
| C | 3.072113  | -0.918727 | 0.093877  |
| H | 6.267065  | 1.609611  | -1.127495 |
| H | 4.028866  | 2.148774  | -1.351824 |

|   |           |           |           |   |           |           |           |
|---|-----------|-----------|-----------|---|-----------|-----------|-----------|
| H | 0.991021  | 1.972507  | -0.197175 | H | 6.185658  | -2.243486 | 0.629947  |
| H | 3.24479   | 2.444873  | -0.283377 | H | 3.928541  | -2.667178 | 0.896806  |
| C | 5.375924  | -1.416164 | -0.337623 | C | 1.775177  | 0.830336  | -0.710067 |
| H | 5.682377  | -2.452    | -0.324242 | H | 1.462629  | 1.77833   | -1.12736  |
| C | 6.233007  | -0.284863 | -0.336333 | C | 0.916685  | -0.186118 | -0.204543 |
| C | 5.435684  | 0.892806  | -0.310404 | C | 1.73115   | -1.244262 | 0.282884  |
| H | 5.801627  | 1.910447  | -0.339692 | H | 1.380174  | -2.174518 | 0.70935   |
| C | 7.683945  | -0.282532 | -0.399786 | C | 7.655011  | -0.359055 | -0.309503 |
| C | 8.428292  | -1.244118 | -1.06981  | C | 8.329924  | -1.41096  | -0.909213 |
| C | 8.44418   | 0.807491  | 0.221075  | C | 8.464178  | 0.719217  | 0.239218  |
| C | 8.160892  | 1.451727  | 1.386156  | C | 8.119972  | 1.620737  | 1.204978  |
| H | 9.365809  | 1.104456  | -0.272031 | H | 9.484726  | 0.793949  | -0.125752 |
| C | 7.856018  | -2.325061 | -1.807463 | C | 7.669129  | -2.476114 | -1.597714 |
| N | 7.442143  | -3.221679 | -2.424599 | N | 7.186744  | -3.358166 | -2.184817 |
| C | 9.858098  | -1.207328 | -1.071664 | C | 9.759055  | -1.495663 | -0.904283 |
| N | 11.022216 | -1.164835 | -1.077658 | N | 10.921998 | -1.55546  | -0.904768 |
| C | 7.092739  | 1.126336  | 2.28958   | C | 6.886664  | 1.654015  | 1.936716  |
| N | 6.285738  | 0.902131  | 3.096157  | N | 5.935399  | 1.734564  | 2.601268  |
| C | 9.024187  | 2.510994  | 1.831497  | C | 9.077081  | 2.615359  | 1.600964  |
| N | 9.712087  | 3.377502  | 2.189483  | N | 9.846586  | 3.42774   | 1.91836   |

**D7Bet(n=16)A4**

|   |            |           |           |
|---|------------|-----------|-----------|
| N | 21.46375   | 0.16338   | -0.172518 |
| C | 21.978729  | 1.494906  | -0.242565 |
| C | 21.591248  | 2.36146   | -1.278246 |
| C | 22.89004   | 1.950632  | 0.714161  |
| C | 22.092351  | 3.653222  | -1.339336 |
| H | 20.894692  | 2.01395   | -2.033989 |
| C | 23.413852  | 3.242333  | 0.647097  |
| H | 23.196536  | 1.287606  | 1.516455  |
| C | 23.010664  | 4.105007  | -0.379243 |
| H | 21.798153  | 4.330368  | -2.13411  |
| H | 24.120044  | 3.564212  | 1.40286   |
| C | 22.370533  | -0.926716 | 0.012727  |
| C | 22.120842  | -1.92076  | 0.963248  |
| C | 23.542614  | -1.004496 | -0.757166 |
| C | 23.010333  | -2.981881 | 1.140944  |
| H | 21.220347  | -1.869759 | 1.566135  |
| C | 24.43983   | -2.04613  | -0.572329 |
| H | 23.74625   | -0.239174 | -1.498644 |
| C | 24.180305  | -3.04783  | 0.375031  |
| H | 22.786021  | -3.736676 | 1.885039  |
| H | 25.347614  | -2.113397 | -1.162506 |
| C | 17.576404  | 0.013135  | -0.113233 |
| C | 18.067796  | -1.150858 | -0.68182  |
| S | 18.918921  | 1.063771  | 0.34875   |
| C | 19.473902  | -1.203261 | -0.78478  |
| H | 17.420758  | -1.936589 | -1.05521  |
| C | 20.102872  | -0.076726 | -0.281681 |
| H | 20.021457  | -2.029582 | -1.220232 |
| O | 23.449421  | 5.386976  | -0.536389 |
| O | 25.12047   | -4.03267  | 0.470604  |
| C | 24.37495   | 5.901244  | 0.408916  |
| H | 23.954427  | 5.912316  | 1.422533  |
| H | 25.309952  | 5.326543  | 0.414711  |
| H | 24.585741  | 6.925006  | 0.09715   |
| C | 24.911279  | -5.070125 | 1.415916  |
| H | 23.991079  | -5.630355 | 1.206005  |
| H | 25.767376  | -5.739608 | 1.322707  |
| H | 24.867856  | -4.68139  | 2.441392  |
| C | -23.182827 | 0.154947  | 0.04389   |
| C | -24.445097 | -0.344559 | -0.179772 |

**D7Beta(n=11)A4**

|   |            |           |           |
|---|------------|-----------|-----------|
| N | 19.516784  | 0.443569  | -0.058732 |
| C | 19.93607   | 1.791882  | -0.281014 |
| C | 19.525059  | 2.490802  | -1.428197 |
| C | 20.775189  | 2.431699  | 0.635573  |
| C | 19.932459  | 3.799704  | -1.638398 |
| H | 18.884335  | 1.999273  | -2.152735 |
| C | 21.205783  | 3.741481  | 0.419876  |
| H | 21.099069  | 1.899332  | 1.523743  |
| C | 20.779911  | 4.436182  | -0.718618 |
| H | 19.619447  | 4.348065  | -2.520482 |
| H | 21.857768  | 4.208286  | 1.148097  |
| C | 20.488103  | -0.540604 | 0.305288  |
| C | 20.25732   | -1.425523 | 1.362459  |
| C | 21.704084  | -0.621622 | -0.393047 |
| C | 21.208856  | -2.383806 | 1.715956  |
| H | 19.323653  | -1.369712 | 1.912063  |
| C | 22.661703  | -1.55871  | -0.034123 |
| H | 21.893381  | 0.058935  | -1.216391 |
| C | 22.421956  | -2.452205 | 1.020607  |
| H | 20.997999  | -3.055739 | 2.539136  |
| H | 23.603699  | -1.627714 | -0.567798 |
| C | 15.652199  | -0.003746 | -0.102683 |
| C | 16.251052  | -1.17932  | -0.527002 |
| S | 16.89314   | 1.191782  | 0.284092  |
| C | 17.659798  | -1.131471 | -0.580313 |
| H | 15.679841  | -2.049654 | -0.829818 |
| C | 18.182734  | 0.087804  | -0.182978 |
| H | 18.284632  | -1.953826 | -0.905326 |
| O | 21.131568  | 5.717901  | -1.025755 |
| O | 23.424097  | -3.340145 | 1.285545  |
| C | 21.988152  | 6.412163  | -0.131932 |
| H | 21.534559  | 6.521194  | 0.861437  |
| H | 22.958881  | 5.910368  | -0.029758 |
| H | 22.139621  | 7.400751  | -0.567196 |
| C | 23.235498  | -4.269371 | 2.341382  |
| H | 22.372223  | -4.921661 | 2.157311  |
| H | 24.141882  | -4.875281 | 2.374936  |
| H | 23.103485  | -3.764629 | 3.307025  |
| C | -17.604409 | 0.310271  | 0.161221  |
| C | -16.508206 | 1.154598  | 0.483531  |



|   |            |           |           |   |            |           |           |
|---|------------|-----------|-----------|---|------------|-----------|-----------|
| H | -23.063004 | 1.164004  | 0.432096  | C | -17.518941 | -1.0245   | -0.31072  |
| H | -24.524267 | -1.356606 | -0.571794 | C | -15.142276 | 0.929137  | 0.424505  |
| C | -25.679614 | 0.315951  | 0.043113  | H | -16.787832 | 2.146399  | 0.832475  |
| C | -26.929187 | -0.232679 | -0.208183 | C | -16.409089 | -1.812422 | -0.568649 |
| C | -25.89764  | 1.719137  | 0.592597  | H | -18.466646 | -1.517554 | -0.49977  |
| C | -27.943688 | 0.730737  | 0.144581  | C | -14.445143 | -0.220492 | 0.026411  |
| O | -27.356736 | 1.850227  | 0.603767  | H | -14.51701  | 1.765844  | 0.732082  |
| C | -29.321548 | 0.673784  | 0.083543  | C | -15.044824 | -1.512835 | -0.438481 |
| C | -27.127198 | -1.537542 | -0.729199 | H | -16.625884 | -2.817566 | -0.926589 |
| N | -27.186703 | -2.618763 | -1.157939 | C | -13.064365 | -0.374545 | -0.006834 |
| C | -30.022765 | -0.471584 | -0.389738 | C | -13.985036 | -2.365941 | -0.720401 |
| N | -30.636241 | -1.38628  | -0.769402 | H | -12.348479 | 0.387002  | 0.27459   |
| C | -30.092112 | 1.79689   | 0.506801  | C | -12.755489 | -1.690213 | -0.464192 |
| N | -30.72709  | 2.710682  | 0.851132  | H | -14.072411 | -3.383982 | -1.080258 |
| C | -25.378189 | 2.831392  | -0.32565  | C | -18.908421 | 0.919802  | 0.351577  |
| H | -25.726465 | 3.798434  | 0.046088  | C | -20.140314 | 0.381357  | 0.102437  |
| H | -24.28642  | 2.840548  | -0.35502  | H | -18.870863 | 1.933706  | 0.738971  |
| H | -25.751032 | 2.693338  | -1.343299 | H | -20.215997 | -0.626765 | -0.29409  |
| C | -25.443341 | 1.886204  | 2.047088  | C | -21.39601  | 1.022963  | 0.311016  |
| H | -25.876735 | 1.103843  | 2.674587  | C | -22.623503 | 0.445715  | 0.038974  |
| H | -24.355478 | 1.831268  | 2.127611  | C | -21.65429  | 2.419535  | 0.860034  |
| H | -25.774445 | 2.858238  | 2.421534  | C | -23.669784 | 1.384158  | 0.377795  |
| C | -9.631958  | -1.073287 | -0.207741 | O | -23.116876 | 2.514817  | 0.848041  |
| C | -8.421114  | -0.461896 | 0.003332  | C | -25.042771 | 1.289559  | 0.293026  |
| H | -9.63867   | -2.106746 | -0.553932 | C | -22.782104 | -0.863188 | -0.487999 |
| H | -8.419409  | 0.572612  | 0.348442  | N | -22.808252 | -1.944306 | -0.91951  |
| C | -7.158733  | -1.080806 | -0.196975 | C | -25.703598 | 0.125845  | -0.194581 |
| C | -5.953547  | -0.45893  | 0.013178  | N | -26.283501 | -0.805178 | -0.586549 |
| H | -7.156271  | -2.115227 | -0.540525 | C | -25.851311 | 2.390411  | 0.70512   |
| H | -5.960349  | 0.576288  | 0.356082  | N | -26.516425 | 3.285745  | 1.040141  |
| C | -4.685613  | -1.06807  | -0.18563  | C | -21.149507 | 3.547056  | -0.048256 |
| C | -3.48551   | -0.437068 | 0.023933  | H | -21.531806 | 4.502702  | 0.319238  |
| H | -4.675142  | -2.102946 | -0.527805 | H | -20.058286 | 3.588112  | -0.05872  |
| H | -3.499916  | 0.598404  | 0.365842  | H | -21.500654 | 3.400884  | -1.072465 |
| C | -2.212606  | -1.037021 | -0.174461 | C | -21.228946 | 2.594658  | 2.322551  |
| C | -1.01729   | -0.39769  | 0.034882  | H | -21.651112 | 1.799304  | 2.94131   |
| H | -2.194797  | -2.071912 | -0.516406 | H | -20.141713 | 2.570494  | 2.422201  |
| H | -1.038857  | 0.63763   | 0.376899  | H | -21.5937   | 3.556229  | 2.692457  |
| C | 0.260294   | -0.988536 | -0.164028 | C | 11.843933  | -0.044424 | -0.046042 |
| C | 1.450855   | -0.341187 | 0.045505  | C | 10.746738  | -0.835669 | -0.254438 |
| H | 0.285206   | -2.023036 | -0.506808 | H | 11.681442  | 0.993042  | 0.2489    |
| H | 1.422155   | 0.693592  | 0.388671  | H | 10.899916  | -1.873214 | -0.551688 |
| C | -10.887858 | -0.443479 | -0.004641 | C | 9.402623   | -0.387398 | -0.108779 |
| C | -12.105225 | -1.042376 | -0.216919 | C | 8.290346   | -1.158473 | -0.319546 |
| H | -10.876215 | 0.589778  | 0.344033  | H | 9.258223   | 0.650756  | 0.192954  |
| H | -12.122851 | -2.074259 | -0.567168 | H | 8.425084   | -2.196582 | -0.623611 |
| C | 2.733086   | -0.922533 | -0.15473  | C | 6.955641   | -0.688028 | -0.167212 |
| C | 3.918659   | -0.267047 | 0.055457  | C | 5.829238   | -1.439128 | -0.379418 |
| H | 2.765263   | -1.95624  | -0.499372 | H | 6.829901   | 0.35055   | 0.141217  |
| H | 3.882472   | 0.766798  | 0.400783  | H | 5.945544   | -2.477519 | -0.689941 |
| C | -13.353303 | -0.399933 | -0.009463 | C | 4.503929   | -0.946955 | -0.220505 |
| C | -14.578358 | -0.983567 | -0.223147 | C | 3.364107   | -1.678187 | -0.433631 |
| H | -13.329679 | 0.631407  | 0.344295  | H | 4.39656    | 0.091813  | 0.094069  |
| H | -14.609317 | -2.013101 | -0.579028 | H | 3.462257   | -2.716629 | -0.750105 |
| C | -15.816764 | -0.326071 | -0.00946  | C | 2.04824    | -1.164876 | -0.268366 |
| C | -17.050969 | -0.890801 | -0.224584 | C | 0.895728   | -1.876548 | -0.48204  |
| H | -15.778389 | 0.70252   | 0.351036  | H | 1.95884    | -0.126112 | 0.051718  |
| H | -17.098496 | -1.917003 | -0.587758 | H | 0.976179   | -2.914849 | -0.803839 |
| C | -18.277222 | -0.215064 | -0.002469 | C | -0.410667  | -1.342736 | -0.310906 |
| C | -19.52227  | -0.756306 | -0.218746 | C | -1.575174  | -2.03517  | -0.524972 |
| H | -18.220447 | 0.809756  | 0.366423  | H | -0.4826    | -0.304164 | 0.014107  |
| H | -19.590567 | -1.777922 | -0.590764 | H | -1.511971  | -3.07313  | -0.851589 |

|   |            |           |           |   |            |           |           |
|---|------------|-----------|-----------|---|------------|-----------|-----------|
| C | 5.205744   | -0.838038 | -0.146823 | C | -2.872029  | -1.481381 | -0.348417 |
| C | 6.385825   | -0.173899 | 0.064549  | C | -4.04797   | -2.154666 | -0.562905 |
| H | 5.24572    | -1.870529 | -0.494346 | H | -2.926875  | -0.443232 | -0.018801 |
| H | 6.34143    | 0.858588  | 0.41304   | H | -4.001814  | -3.192025 | -0.894131 |
| C | -20.733204 | -0.058342 | 0.014212  | C | -5.335094  | -1.581113 | -0.381094 |
| C | -21.990723 | -0.570725 | -0.202503 | C | -6.52211   | -2.234864 | -0.596157 |
| H | -20.652945 | 0.961495  | 0.39291   | H | -5.372898  | -0.543709 | -0.046805 |
| H | -22.08576  | -1.586143 | -0.58454  | H | -6.493226  | -3.271245 | -0.932191 |
| C | 7.678206   | -0.733224 | -0.140417 | C | -7.799191  | -1.641274 | -0.408807 |
| C | 8.851996   | -0.05955  | 0.07274   | C | -8.997047  | -2.274475 | -0.62453  |
| H | 7.726863   | -1.764037 | -0.491841 | H | -7.819452  | -0.60508  | -0.069337 |
| H | 8.798318   | 0.971108  | 0.425415  | H | -8.986989  | -3.309377 | -0.966063 |
| C | 10.150353  | -0.605424 | -0.135497 | C | -10.263737 | -1.659609 | -0.430402 |
| C | 11.316685  | 0.079012  | 0.080171  | C | -11.465818 | -2.278687 | -0.650181 |
| H | 10.208918  | -1.634033 | -0.49188  | H | -10.260034 | -0.626525 | -0.085105 |
| H | 11.252168  | 1.107339  | 0.437921  | H | -11.451945 | -3.310239 | -0.999441 |
| C | 12.622046  | -0.451177 | -0.131512 | C | 13.197588  | -0.470076 | -0.186746 |
| C | 13.77906   | 0.246114  | 0.086804  | C | 14.268962  | 0.351532  | 0.021843  |
| H | 12.692099  | -1.477061 | -0.493628 | H | 13.364933  | -1.506937 | -0.474616 |
| H | 13.702386  | 1.271638  | 0.450294  | H | 14.061094  | 1.37934   | 0.317036  |
| C | 15.092735  | -0.26571  | -0.129325 |   |            |           |           |
| C | 16.229337  | 0.457264  | 0.096791  |   |            |           |           |
| H | 15.172116  | -1.288883 | -0.493822 |   |            |           |           |
| H | 16.110832  | 1.471066  | 0.477517  |   |            |           |           |

**D7Beta(r)(n=11)A4**

|   |           |           |           |
|---|-----------|-----------|-----------|
| N | 19.570516 | 0.3222    | -0.127113 |
| C | 20.023716 | 1.668559  | -0.28722  |
| C | 19.617622 | 2.436553  | -1.391129 |
| C | 20.893559 | 2.236393  | 0.647827  |
| C | 20.06049  | 3.742285  | -1.540963 |
| H | 18.952913 | 2.001483  | -2.130068 |
| C | 21.35913  | 3.542687  | 0.492584  |
| H | 21.214008 | 1.649988  | 1.502663  |
| C | 20.938388 | 4.306593  | -0.602768 |
| H | 19.751755 | 4.343724  | -2.389313 |
| H | 22.034261 | 3.952732  | 1.233846  |
| C | 20.52446  | -0.706874 | 0.149233  |
| C | 20.307016 | -1.637431 | 1.169329  |
| C | 21.710062 | -0.786129 | -0.599366 |
| C | 21.241772 | -2.639165 | 1.436609  |
| H | 19.39681  | -1.583084 | 1.757183  |
| C | 22.651496 | -1.767577 | -0.326475 |
| H | 21.888804 | -0.069642 | -1.394116 |
| C | 22.424692 | -2.706772 | 0.690859  |
| H | 21.042078 | -3.3456   | 2.233287  |
| H | 23.570091 | -1.83589  | -0.899544 |
| C | 15.695074 | -0.01364  | -0.110908 |
| C | 16.251865 | -1.190602 | -0.585822 |
| S | 16.977536 | 1.132904  | 0.290531  |
| C | 17.659888 | -1.181377 | -0.664827 |
| H | 15.650126 | -2.033763 | -0.905926 |
| C | 18.225301 | 0.008823  | -0.237059 |
| H | 18.254199 | -2.009875 | -1.028922 |
| O | 21.32284  | 5.591691  | -0.849188 |
| O | 23.408132 | -3.63558  | 0.871067  |
| C | 22.207191 | 6.216381  | 0.068869  |
| H | 21.766666 | 6.286215  | 1.071558  |
| H | 23.165076 | 5.684694  | 0.13412   |
| H | 22.380741 | 7.221569  | -0.317305 |
| C | 23.23287  | -4.60965  | 1.888201  |
| H | 22.342934 | -5.226514 | 1.709143  |

**D7Baet(n=11)A4**

|   |           |           |           |
|---|-----------|-----------|-----------|
| N | 18.087418 | -0.30562  | -0.223193 |
| C | 18.533913 | 1.050417  | -0.289083 |
| C | 18.145769 | 1.884691  | -1.35068  |
| C | 19.379574 | 1.563275  | 0.698525  |
| C | 18.581713 | 3.20013   | -1.407455 |
| H | 17.499767 | 1.493932  | -2.129786 |
| C | 19.838358 | 2.879667  | 0.636685  |
| H | 19.685701 | 0.925902  | 1.521498  |
| C | 19.434794 | 3.709176  | -0.416437 |
| H | 18.285999 | 3.852476  | -2.22216  |
| H | 20.494362 | 3.245861  | 1.417127  |
| C | 19.042851 | -1.343002 | 0.01379   |
| C | 18.810385 | -2.331694 | 0.974187  |
| C | 20.243972 | -1.373391 | -0.713289 |
| C | 19.745556 | -3.342411 | 1.202877  |
| H | 17.887462 | -2.31627  | 1.544217  |
| C | 21.185741 | -2.364385 | -0.477841 |
| H | 20.434246 | -0.611634 | -1.461985 |
| C | 20.943751 | -3.361426 | 0.479003  |
| H | 19.533685 | -4.09456  | 1.953242  |
| H | 22.116133 | -2.395271 | -1.034923 |
| C | 14.218291 | -0.672679 | -0.336989 |
| C | 14.798563 | -1.815719 | -0.856242 |
| S | 15.475757 | 0.462538  | 0.160465  |
| C | 16.209739 | -1.793613 | -0.897207 |
| H | 14.210516 | -2.643648 | -1.235353 |
| C | 16.748547 | -0.623833 | -0.391629 |
| H | 16.820655 | -2.598009 | -1.286559 |
| O | 19.813968 | 5.010509  | -0.571732 |
| O | 21.9286   | -4.295037 | 0.626173  |
| C | 20.67017  | 5.581669  | 0.405491  |
| H | 20.206214 | 5.58146   | 1.400059  |
| H | 21.632233 | 5.056068  | 0.458536  |
| H | 20.841705 | 6.611689  | 0.090196  |
| C | 21.736902 | -5.326594 | 1.581581  |
| H | 20.8537   | -5.935315 | 1.349038  |

|   |            |           |           |   |            |           |           |
|---|------------|-----------|-----------|---|------------|-----------|-----------|
| H | 24.120435  | -5.242796 | 1.854985  | H | 22.627901  | -5.953775 | 1.530585  |
| H | 23.155679  | -4.149047 | 2.881429  | H | 21.637061  | -4.924384 | 2.597908  |
| C | -12.790897 | -1.290305 | -0.237563 | C | 7.674365   | 0.784556  | 0.188732  |
| C | -13.839917 | -2.149073 | -0.672603 | C | 8.59315    | 1.799348  | 0.549566  |
| C | -12.963083 | -0.002883 | 0.339758  | C | 8.015363   | -0.515263 | -0.270514 |
| C | -15.211956 | -1.972678 | -0.671607 | C | 9.983491   | 1.807825  | 0.555797  |
| H | -13.502933 | -3.099231 | -1.079772 | H | 8.134003   | 2.729278  | 0.877975  |
| C | -14.118002 | 0.71286   | 0.600074  | C | 9.254366   | -1.096192 | -0.47765  |
| H | -12.048881 | 0.502041  | 0.6334    | H | 7.175219   | -1.163226 | -0.499308 |
| C | -15.976956 | -0.880716 | -0.229168 | C | 10.882672  | 0.799688  | 0.199184  |
| H | -15.78798  | -2.804048 | -1.07562  | H | 10.4407    | 2.739153  | 0.887386  |
| C | -15.46192  | 0.376477  | 0.369437  | C | 10.541769  | -0.567446 | -0.291229 |
| H | -13.964067 | 1.689843  | 1.056879  | H | 9.230984   | -2.122217 | -0.843107 |
| C | -17.367489 | -0.785999 | -0.26819  | C | 12.277299  | 0.883433  | 0.230209  |
| C | -16.571148 | 1.168127  | 0.665766  | C | 11.743968  | -1.224449 | -0.529653 |
| H | -18.03338  | -1.549342 | -0.649649 | H | 12.843219  | 1.754111  | 0.537998  |
| C | -17.750563 | 0.471026  | 0.279558  | C | 12.823373  | -0.34585  | -0.215758 |
| H | -16.543232 | 2.154412  | 1.113867  | H | 11.839157  | -2.241202 | -0.888706 |
| C | -19.073366 | 0.995039  | 0.44041   | C | -20.778032 | -0.086991 | 0.000628  |
| C | -20.231188 | 0.366513  | 0.067927  | C | -22.004974 | -0.674729 | -0.197732 |
| H | -19.128508 | 1.978439  | 0.900101  | H | -20.722077 | 0.934776  | 0.369421  |
| H | -20.159768 | -0.614215 | -0.39528  | H | -22.020012 | -1.696921 | -0.5707   |
| C | -21.556396 | 0.861871  | 0.220296  | C | -23.279963 | -0.096385 | 0.032287  |
| C | -22.698416 | 0.188553  | -0.178348 | C | -24.490465 | -0.735642 | -0.189405 |
| C | -21.992227 | 2.185149  | 0.833523  | C | -23.587422 | 1.298526  | 0.559635  |
| C | -23.854494 | 0.995401  | 0.13945   | C | -25.565564 | 0.161373  | 0.161655  |
| O | -23.452965 | 2.138739  | 0.720005  | O | -25.051957 | 1.327537  | 0.591047  |
| C | -25.202725 | 0.775983  | -0.052658 | C | -26.936225 | 0.005926  | 0.122851  |
| C | -22.687515 | -1.089571 | -0.796351 | C | -24.603899 | -2.06099  | -0.683753 |
| N | -22.577461 | -2.135735 | -1.295594 | N | -24.593634 | -3.151593 | -1.092047 |
| C | -25.709824 | -0.408512 | -0.659448 | C | -27.560594 | -1.195544 | -0.318152 |
| N | -26.167667 | -1.360502 | -1.150376 | N | -28.11208  | -2.15903  | -0.67113  |
| C | -26.143671 | 1.762987  | 0.366465  | C | -27.77872  | 1.079867  | 0.536878  |
| N | -26.91702  | 2.56483   | 0.706218  | N | -28.471935 | 1.953149  | 0.873721  |
| C | -21.543149 | 3.414378  | 0.034971  | C | -23.160295 | 2.42612   | -0.387026 |
| H | -22.036661 | 4.304026  | 0.434451  | H | -23.570511 | 3.373432  | -0.027956 |
| H | -20.462127 | 3.553975  | 0.101282  | H | -22.072379 | 2.511269  | -0.433152 |
| H | -21.814791 | 3.307361  | -1.017889 | H | -23.536832 | 2.242419  | -1.39607  |
| C | -21.685091 | 2.301     | 2.330914  | C | -23.125121 | 1.524445  | 2.003519  |
| H | -22.06016  | 1.426063  | 2.867117  | H | -23.493089 | 0.725531  | 2.651628  |
| H | -20.610204 | 2.380447  | 2.50649   | H | -22.035068 | 1.547495  | 2.067702  |
| H | -22.173334 | 3.192836  | 2.731903  | H | -23.518292 | 2.477698  | 2.366023  |
| C | 11.889209  | 0.049202  | 0.016295  | C | 3.831186   | 0.908381  | 0.223269  |
| C | 10.767427  | -0.706064 | -0.196041 | C | 2.695483   | 0.190384  | -0.031416 |
| H | 11.760453  | 1.081089  | 0.345446  | H | 3.726516   | 1.93212   | 0.583669  |
| H | 10.887844  | -1.737875 | -0.526413 | H | 2.795117   | -0.83379  | -0.391125 |
| C | 9.438308   | -0.227918 | -0.014734 | C | 1.374354   | 0.695908  | 0.144053  |
| C | 8.303985   | -0.965786 | -0.228117 | C | 0.230182   | -0.013361 | -0.104534 |
| H | 9.325243   | 0.804722  | 0.317679  | H | 1.27932    | 1.721338  | 0.502479  |
| H | 8.408962   | -1.998258 | -0.561637 | H | 0.320143   | -1.039111 | -0.462173 |
| C | 6.983316   | -0.468809 | -0.043567 | C | -1.08441   | 0.503735  | 0.075172  |
| C | 5.837904   | -1.190451 | -0.257414 | C | -2.23674   | -0.196253 | -0.166846 |
| H | 6.885493   | 0.564446  | 0.291641  | H | -1.169162  | 1.530796  | 0.431598  |
| H | 5.928228   | -2.223443 | -0.593512 | H | -2.157408  | -1.225338 | -0.52247  |
| C | 4.525208   | -0.6757   | -0.070194 | C | -3.544762  | 0.333015  | 0.017621  |
| C | 3.36959    | -1.381672 | -0.284495 | C | -4.705279  | -0.357047 | -0.217629 |
| H | 4.441757   | 0.358007  | 0.267419  | H | -3.618655  | 1.361562  | 0.372236  |
| H | 3.445861   | -2.414993 | -0.622964 | H | -4.637135  | -1.385685 | -0.571524 |
| C | 2.064652   | -0.849909 | -0.094827 | C | -6.006442  | 0.184873  | -0.027894 |
| C | 0.89942    | -1.540452 | -0.309735 | C | -7.175297  | -0.494526 | -0.256451 |
| H | 1.995073   | 0.184032  | 0.245149  | H | -6.068916  | 1.214665  | 0.325352  |
| H | 0.961955   | -2.573859 | -0.650639 | H | -7.118946  | -1.524228 | -0.609164 |

|   |            |           |           |   |            |           |           |
|---|------------|-----------|-----------|---|------------|-----------|-----------|
| C | -0.397772  | -0.99207  | -0.117654 | C | -8.469136  | 0.060609  | -0.060844 |
| C | -1.572307  | -1.666973 | -0.333463 | C | -9.646651  | -0.607096 | -0.282963 |
| H | -0.453632  | 0.041818  | 0.224973  | H | -8.519488  | 1.091301  | 0.291762  |
| H | -1.523602  | -2.700137 | -0.677211 | H | -9.602956  | -1.637461 | -0.635326 |
| C | -2.861516  | -1.101891 | -0.138648 | C | -10.93245  | -0.037885 | -0.080654 |
| C | -4.045358  | -1.760323 | -0.355697 | C | -12.119212 | -0.692348 | -0.296659 |
| H | -2.903307  | -0.068444 | 0.207293  | H | -10.969609 | 0.993262  | 0.272328  |
| H | -4.011167  | -2.792782 | -0.703107 | H | -12.089541 | -1.722854 | -0.649792 |
| C | -5.326025  | -1.177833 | -0.157299 | C | -13.395867 | -0.107662 | -0.086448 |
| C | -6.519498  | -1.818043 | -0.376062 | C | -14.592846 | -0.746551 | -0.296584 |
| H | -5.352702  | -0.145384 | 0.193121  | H | -13.418121 | 0.923371  | 0.268224  |
| H | -6.501269  | -2.849159 | -0.728361 | H | -14.579398 | -1.776512 | -0.651892 |
| C | -7.790775  | -1.216509 | -0.172819 | C | -15.858661 | -0.144151 | -0.076721 |
| C | -8.994243  | -1.836111 | -0.392925 | C | -17.067305 | -0.764019 | -0.280972 |
| H | -7.800179  | -0.185769 | 0.183551  | H | -15.863294 | 0.886042  | 0.281239  |
| H | -8.994436  | -2.864998 | -0.75185  | H | -17.073529 | -1.792501 | -0.640094 |
| C | -10.25562  | -1.212234 | -0.181047 | C | -18.319802 | -0.14057  | -0.049027 |
| C | -11.456112 | -1.824826 | -0.416576 | C | -19.541884 | -0.736715 | -0.246909 |
| H | -10.227275 | -0.186306 | 0.18108   | H | -18.302299 | 0.887888  | 0.314019  |
| H | -11.413831 | -2.842796 | -0.800183 | H | -19.57364  | -1.762419 | -0.611615 |
| C | 13.227456  | -0.408707 | -0.16246  | C | 5.159846   | 0.412256  | 0.051027  |
| C | 14.325538  | 0.375707  | 0.051984  | C | 6.272353   | 1.155017  | 0.316682  |
| H | 13.360121  | -1.44002  | -0.486037 | H | 5.250704   | -0.609956 | -0.310257 |
| H | 14.152312  | 1.39863   | 0.384186  | H | 6.099788   | 2.169179  | 0.67518   |

**D7Ba(r)jet(n=11)A4**

|   |           |           |           |
|---|-----------|-----------|-----------|
| N | 18.017992 | -0.445818 | -0.206154 |
| C | 18.53445  | 0.887755  | -0.177005 |
| C | 18.246319 | 1.789686  | -1.214444 |
| C | 19.347104 | 1.308     | 0.879227  |
| C | 18.746939 | 3.082567  | -1.181337 |
| H | 17.626934 | 1.468307  | -2.045338 |
| C | 19.871063 | 2.601183  | 0.908894  |
| H | 19.576005 | 0.616612  | 1.683541  |
| C | 19.566474 | 3.499425  | -0.121032 |
| H | 18.5291   | 3.787804  | -1.976263 |
| H | 20.499725 | 2.896383  | 1.740046  |
| C | 18.909332 | -1.545865 | -0.004706 |
| C | 18.577821 | -2.59363  | 0.859109  |
| C | 20.147126 | -1.579566 | -0.667348 |
| C | 19.451442 | -3.664575 | 1.054809  |
| H | 17.626321 | -2.576752 | 1.37992   |
| C | 21.02771  | -2.631616 | -0.462451 |
| H | 20.414759 | -0.772549 | -1.341103 |
| C | 20.686826 | -3.687036 | 0.396681  |
| H | 19.163217 | -4.461387 | 1.729769  |
| H | 21.98591  | -2.66513  | -0.97001  |
| C | 14.13731  | -0.577119 | -0.456022 |
| C | 14.671832 | -1.701617 | -1.057813 |
| S | 15.445022 | 0.427691  | 0.177965  |
| C | 16.083374 | -1.762009 | -1.058281 |
| H | 14.059742 | -2.445442 | -1.55398  |
| C | 16.671426 | -0.676309 | -0.437071 |
| H | 16.65771  | -2.560556 | -1.510402 |
| O | 20.013962 | 4.785804  | -0.189903 |
| O | 21.618226 | -4.676819 | 0.51987   |
| C | 20.842353 | 5.267201  | 0.857552  |
| H | 20.326377 | 5.241748  | 1.825757  |
| H | 21.775012 | 4.693617  | 0.932565  |
| H | 21.0774   | 6.301579  | 0.603649  |
| C | 21.327443 | -5.769164 | 1.377991  |
| H | 20.432988 | -6.31455  | 1.050651  |

**D7Baze(n=4)A4**

|   |           |           |           |
|---|-----------|-----------|-----------|
| N | 16.883764 | 0.412219  | 0.02738   |
| C | 17.27757  | 1.772894  | -0.163798 |
| C | 16.905662 | 2.471149  | -1.324659 |
| C | 18.053192 | 2.425903  | 0.798275  |
| C | 17.288498 | 3.792012  | -1.504278 |
| H | 16.315161 | 1.96969   | -2.084209 |
| C | 18.45921  | 3.748231  | 0.614396  |
| H | 18.346653 | 1.894115  | 1.697293  |
| C | 18.072076 | 4.441984  | -0.538466 |
| H | 17.005387 | 4.33991   | -2.396689 |
| H | 19.061787 | 4.225082  | 1.377845  |
| C | 17.862621 | -0.548858 | 0.431673  |
| C | 17.606944 | -1.443967 | 1.474381  |
| C | 19.110116 | -0.596602 | -0.211941 |
| C | 18.565021 | -2.38041  | 1.866475  |
| H | 16.648427 | -1.413952 | 1.981579  |
| C | 20.07357  | -1.511771 | 0.18588   |
| H | 19.319108 | 0.0923    | -1.023524 |
| C | 19.80909  | -2.416023 | 1.225438  |
| H | 18.33428  | -3.061341 | 2.676829  |
| H | 21.039785 | -1.555262 | -0.305508 |
| C | 13.040144 | -0.141621 | -0.208666 |
| C | 13.692219 | -1.300093 | -0.600235 |
| S | 14.226239 | 1.089569  | 0.234825  |
| C | 15.099759 | -1.212651 | -0.584055 |
| H | 13.161398 | -2.185901 | -0.930319 |
| C | 15.567924 | 0.021254  | -0.163931 |
| H | 15.762757 | -2.01723  | -0.876142 |
| O | 18.404611 | 5.735147  | -0.81737  |
| O | 20.819629 | -3.280905 | 1.531107  |
| C | 19.197515 | 6.442681  | 0.123641  |
| H | 18.692576 | 6.530649  | 1.094053  |
| H | 20.174673 | 5.964861  | 0.269901  |
| H | 19.344571 | 7.438887  | -0.295445 |
| C | 20.60677  | -4.220316 | 2.573329  |
| H | 19.767995 | -4.891438 | 2.348381  |

|   |            |           |           |   |            |           |           |
|---|------------|-----------|-----------|---|------------|-----------|-----------|
| H | 22.19145   | -6.432738 | 1.324006  | H | 21.524819  | -4.805101 | 2.643858  |
| H | 21.187957  | -5.442986 | 2.416628  | H | 20.42076   | -3.724229 | 3.534531  |
| C | 12.73616   | -0.175592 | -0.346782 | C | -14.556226 | 0.579358  | 0.170942  |
| C | 11.774388  | -1.217682 | -0.438268 | C | -13.574756 | 1.595439  | 0.310855  |
| C | 12.451498  | 1.196916  | -0.157375 | C | -14.308804 | -0.791691 | -0.086501 |
| C | 10.390831  | -1.166506 | -0.403743 | C | -12.191044 | 1.535401  | 0.236352  |
| H | 12.187317  | -2.217186 | -0.5282   | H | -13.973903 | 2.587799  | 0.508807  |
| C | 11.233765  | 1.853077  | -0.020142 | C | -13.109775 | -1.465415 | -0.263755 |
| H | 13.318407  | 1.851385  | -0.135667 | H | -15.187346 | -1.424078 | -0.157427 |
| C | 9.529475   | -0.070562 | -0.239064 | C | -11.359626 | 0.433821  | -0.001686 |
| H | 9.891928   | -2.129835 | -0.504902 | H | -11.674317 | 2.482288  | 0.384675  |
| C | 9.930737   | 1.348089  | -0.047927 | C | -11.796159 | -0.980112 | -0.238215 |
| H | 11.306429  | 2.931366  | 0.117378  | H | -13.201274 | -2.533988 | -0.451404 |
| C | 8.136819   | -0.112661 | -0.206643 | C | -9.969601  | 0.44849   | -0.061923 |
| C | 8.750487   | 2.085942  | 0.090787  | C | -10.638375 | -1.72767  | -0.426952 |
| H | 7.539333   | -1.009307 | -0.313957 | H | -9.353903  | 1.328925  | 0.068603  |
| C | 7.640846   | 1.208044  | -0.005285 | C | -9.504762  | -0.87262  | -0.32241  |
| H | 8.690761   | 3.157036  | 0.243995  | H | -10.599941 | -2.792644 | -0.621541 |
| C | -20.760532 | -0.144301 | 0.037823  | C | -15.927226 | 1.045172  | 0.314393  |
| C | -21.973069 | -0.777611 | -0.104849 | C | -17.079973 | 0.319924  | 0.218579  |
| H | -20.729451 | 0.914572  | 0.2847    | H | -16.014366 | 2.107672  | 0.52102   |
| H | -21.961508 | -1.838045 | -0.348904 | H | -17.030367 | -0.744544 | 0.009237  |
| C | -23.262608 | -0.20311  | 0.030628  | C | -18.407138 | 0.82447   | 0.367698  |
| C | -24.456345 | -0.894028 | -0.118499 | C | -19.549177 | 0.053891  | 0.26192   |
| C | -23.607852 | 1.244199  | 0.352758  | C | -18.838428 | 2.254434  | 0.662491  |
| C | -25.555169 | 0.018376  | 0.088397  | C | -20.706419 | 0.897246  | 0.470643  |
| O | -25.073059 | 1.244296  | 0.358495  | O | -20.300669 | 2.157014  | 0.699874  |
| C | -26.921795 | -0.171245 | 0.05151   | C | -22.054418 | 0.610845  | 0.467139  |
| C | -24.534251 | -2.277229 | -0.425452 | C | -19.54082  | -1.340334 | -0.008708 |
| N | -24.494779 | -3.413442 | -0.67799  | N | -19.429934 | -2.477304 | -0.233105 |
| C | -27.514491 | -1.43575  | -0.226719 | C | -22.560182 | -0.699767 | 0.231156  |
| N | -28.040884 | -2.450735 | -0.449933 | N | -23.014768 | -1.755389 | 0.042729  |
| C | -27.792525 | 0.930988  | 0.299155  | C | -22.996722 | 1.655101  | 0.707044  |
| N | -28.508796 | 1.827171  | 0.500456  | N | -23.769711 | 2.50379   | 0.902416  |
| C | -23.186117 | 2.234249  | -0.738987 | C | -18.5085   | 3.244699  | -0.460684 |
| H | -23.605647 | 3.218902  | -0.517344 | H | -19.001565 | 4.198255  | -0.255792 |
| H | -22.098666 | 2.320546  | -0.792878 | H | -17.432462 | 3.416306  | -0.533026 |
| H | -23.556175 | 1.907813  | -1.713778 | H | -18.864632 | 2.866492  | -1.421818 |
| C | -23.177657 | 1.68556   | 1.756437  | C | -18.411075 | 2.7564    | 2.046776  |
| H | -23.531042 | 0.974205  | 2.506648  | H | -18.698621 | 2.040139  | 2.820068  |
| H | -22.090344 | 1.756431  | 1.831678  | H | -17.330358 | 2.905249  | 2.096863  |
| H | -23.608459 | 2.666178  | 1.974074  | H | -18.905103 | 3.709361  | 2.252172  |
| C | 3.828248   | 1.322122  | 0.088406  | C | 9.236367   | -0.31608  | -0.311929 |
| C | 2.707633   | 0.546048  | -0.029239 | C | 8.182902   | -1.160363 | -0.536442 |
| H | 3.701533   | 2.388807  | 0.276628  | H | 9.020664   | 0.722261  | -0.05706  |
| H | 2.829984   | -0.520042 | -0.220781 | H | 8.393271   | -2.199157 | -0.791546 |
| C | 1.376738   | 1.04213   | 0.081817  | C | 6.814669   | -0.771777 | -0.456984 |
| C | 0.246856   | 0.27849   | -0.043685 | C | 5.752114   | -1.607528 | -0.675223 |
| H | 1.259759   | 2.108021  | 0.280498  | H | 6.608651   | 0.268273  | -0.20127  |
| H | 0.358106   | -0.78683  | -0.245835 | H | 5.952613   | -2.64804  | -0.931152 |
| C | -1.0772    | 0.78767   | 0.072462  | C | 4.388233   | -1.207604 | -0.586963 |
| C | -2.216395  | 0.03761   | -0.060273 | C | 3.317733   | -2.035073 | -0.798194 |
| H | -1.182654  | 1.85272   | 0.281855  | H | 4.192247   | -0.165988 | -0.329964 |
| H | -2.117182  | -1.026769 | -0.273154 | H | 3.507483   | -3.077251 | -1.055472 |
| C | -3.533438  | 0.560677  | 0.061772  | C | 1.957319   | -1.623488 | -0.700243 |
| C | -4.682038  | -0.175047 | -0.077315 | C | 0.887058   | -2.449    | -0.906054 |
| H | -3.626605  | 1.624756  | 0.281674  | H | 1.77682    | -0.580851 | -0.441389 |
| H | -4.59548   | -1.238367 | -0.300527 | H | 1.088555   | -3.488045 | -1.164357 |
| C | -5.991755  | 0.362466  | 0.05094   | C | -7.043456  | -0.542496 | -0.353243 |
| C | -7.149792  | -0.358474 | -0.093423 | C | -8.149233  | -1.329702 | -0.463687 |
| H | -6.072108  | 1.425532  | 0.280578  | H | -7.208671  | 0.510383  | -0.134493 |
| H | -7.076301  | -1.420714 | -0.326003 | H | -8.039566  | -2.391987 | -0.666386 |

|   |            |           |           |   |           |           |           |
|---|------------|-----------|-----------|---|-----------|-----------|-----------|
| C | -8.451848  | 0.193908  | 0.040904  | C | 10.609854 | -0.69256  | -0.384168 |
| C | -9.619329  | -0.511986 | -0.107416 | C | 11.642292 | 0.171169  | -0.151084 |
| H | -8.519024  | 1.256039  | 0.278953  | H | 10.826257 | -1.729822 | -0.635582 |
| H | -9.559263  | -1.573251 | -0.347856 | H | 11.388288 | 1.197402  | 0.111737  |
| C | -10.913317 | 0.055777  | 0.032484  | C | -5.642416 | -0.92004  | -0.476855 |
| C | -12.090346 | -0.634755 | -0.118227 | C | -5.304975 | -2.253112 | -0.820592 |
| H | -10.966896 | 1.117183  | 0.277144  | C | -4.064708 | -2.850073 | -0.983669 |
| H | -12.044278 | -1.695277 | -0.364574 | C | -4.722066 | 0.131909  | -0.23062  |
| C | -13.375657 | -0.050705 | 0.026541  | C | -2.779524 | -2.305087 | -0.854508 |
| C | -14.562607 | -0.725154 | -0.124716 | C | -3.335149 | 0.14561   | -0.240859 |
| H | -13.41484  | 1.010312  | 0.275665  | C | -2.432982 | -0.893719 | -0.504121 |
| H | -14.531711 | -1.78525  | -0.374692 | H | -6.145352 | -2.918594 | -0.989159 |
| C | -15.838211 | -0.123109 | 0.024203  | H | -4.088848 | -3.905045 | -1.253565 |
| C | -17.035903 | -0.77991  | -0.125404 | H | -5.182755 | 1.087015  | 0.011746  |
| H | -15.861377 | 0.937942  | 0.275403  | H | -2.877572 | 1.106121  | -0.007836 |
| H | -17.022451 | -1.839898 | -0.376496 | C | -1.575507 | -2.980206 | -1.031319 |
| C | -18.300137 | -0.156968 | 0.027137  | H | -1.470995 | -4.026278 | -1.293611 |
| C | -19.509812 | -0.79334  | -0.118252 | C | -0.494541 | -2.079104 | -0.811002 |
| H | -18.30391  | 0.904604  | 0.277909  | C | -1.043477 | -0.804174 | -0.490271 |
| H | -19.51852  | -1.853441 | -0.367709 | H | -0.48213  | 0.094674  | -0.26905  |
| C | 5.166236   | 0.837548  | -0.018762 |   |           |           |           |
| C | 6.270614   | 1.631711  | 0.090993  |   |           |           |           |
| H | 5.293606   | -0.228543 | -0.200566 |   |           |           |           |
| H | 6.11315    | 2.695787  | 0.26706   |   |           |           |           |

#### D7Bst(n=13)A4

|   |           |           |           |   |            |           |           |
|---|-----------|-----------|-----------|---|------------|-----------|-----------|
| N | 20.514973 | 0.234117  | -0.165332 | C | -10.56243  | -1.453436 | -0.280112 |
| C | 21.013291 | 1.571732  | -0.231451 | C | -9.364906  | -0.820783 | -0.077671 |
| C | 20.609301 | 2.438681  | -1.260548 | H | -10.553521 | -2.49613  | -0.597378 |
| C | 21.923474 | 2.034887  | 0.722932  | H | -9.378884  | 0.222164  | 0.240864  |
| C | 21.093151 | 3.737211  | -1.317577 | C | -8.089266  | -1.427155 | -0.255836 |
| H | 19.913254 | 2.086087  | -2.0144   | C | -6.896443  | -0.785108 | -0.051763 |
| C | 22.430162 | 3.333614  | 0.659586  | H | -8.07112   | -2.468444 | -0.577574 |
| H | 22.242695 | 1.372281  | 1.520582  | H | -6.918902  | 0.256289  | 0.271258  |
| C | 22.010539 | 4.196191  | -0.360127 | C | -5.616408  | -1.380142 | -0.233756 |
| H | 20.785728 | 4.414387  | -2.107323 | C | -4.428025  | -0.729968 | -0.028175 |
| H | 23.135934 | 3.660767  | 1.413505  | H | -5.59035   | -2.419917 | -0.560007 |
| C | 21.432689 | -0.845645 | 0.024552  | H | -4.457968  | 0.30981   | 0.299402  |
| C | 21.186046 | -1.845389 | 0.969935  | C | -3.143859  | -1.314545 | -0.214144 |
| C | 22.611739 | -0.908871 | -0.736099 | C | -1.959862  | -0.656842 | -0.006931 |
| C | 22.085314 | -2.897516 | 1.151711  | H | -3.11055   | -2.352666 | -0.545103 |
| H | 20.280008 | -1.806063 | 1.565332  | H | -1.99692   | 0.381185  | 0.325443  |
| C | 23.518559 | -1.941463 | -0.546954 | C | -0.671615  | -1.231143 | -0.19702  |
| H | 22.813048 | -0.139428 | -1.473941 | C | 0.507817   | -0.566014 | 0.012116  |
| C | 23.262149 | -2.948669 | 0.395317  | H | -0.631183  | -2.267415 | -0.533038 |
| H | 21.862849 | -3.656986 | 1.891602  | H | 0.463552   | 0.470066  | 0.349679  |
| H | 24.431659 | -1.99732  | -1.130104 | C | -11.83329  | -0.833955 | -0.105514 |
| C | 16.629181 | 0.028607  | -0.114447 | C | -13.035753 | -1.455054 | -0.306053 |
| C | 17.137384 | -1.118077 | -0.7024   | H | -11.836804 | 0.210513  | 0.208466  |
| S | 17.955808 | 1.089483  | 0.368213  | H | -13.038946 | -2.499062 | -0.618734 |
| C | 18.544672 | -1.148438 | -0.804524 | C | 1.800294   | -1.129657 | -0.182259 |
| H | 16.501933 | -1.905742 | -1.09128  | C | 2.974758   | -0.456814 | 0.029225  |
| C | 19.156957 | -0.022545 | -0.281421 | H | 1.848133   | -2.163818 | -0.523837 |
| H | 19.104489 | -1.959167 | -1.253669 | H | 2.92282    | 0.577042  | 0.372513  |
| O | 22.431923 | 5.484787  | -0.512909 | C | -14.301866 | -0.818789 | -0.134581 |
| O | 24.212053 | -3.923954 | 0.495818  | C | -15.500071 | -1.43828  | -0.334979 |
| C | 23.355312 | 6.005829  | 0.430564  | H | -14.279887 | 0.225297  | 0.174753  |
| H | 22.939824 | 6.006037  | 1.446347  | H | -15.479265 | -2.483889 | -0.639532 |
| H | 24.297711 | 5.443235  | 0.428794  | C | 4.271792   | -1.008942 | -0.169644 |
| H | 23.551439 | 7.033923  | 0.123425  | C | 5.44066    | -0.32778  | 0.04472   |
| C | 24.005706 | -4.966153 | 1.436362  | H | 4.327658   | -2.040651 | -0.517414 |
| H | 23.093042 | -5.535196 | 1.217333  | H | 5.38027    | 0.703498  | 0.394392  |

|   |            |           |           |   |            |           |           |
|---|------------|-----------|-----------|---|------------|-----------|-----------|
| H | 24.869353  | -5.626633 | 1.34846   | C | 6.742745   | -0.86711  | -0.158883 |
| H | 23.949742  | -4.580933 | 2.462586  | C | 7.905158   | -0.176759 | 0.058956  |
| C | -20.795151 | 0.73181   | 0.188005  | H | 6.807536   | -1.895952 | -0.513577 |
| C | -21.990124 | 0.096729  | 0.003995  | H | 7.835275   | 0.851506  | 0.415753  |
| H | -20.800495 | 1.782143  | 0.467851  | C | 9.212953   | -0.701622 | -0.149678 |
| H | -21.991258 | -0.954489 | -0.270987 | C | 10.367768  | -0.00099  | 0.072302  |
| C | -23.287796 | 0.673122  | 0.135301  | H | 9.2878     | -1.727095 | -0.512106 |
| C | -24.471835 | -0.01512  | -0.053684 | H | 10.286996  | 1.023788  | 0.436864  |
| C | -23.640205 | 2.110282  | 0.491194  | C | 11.682199  | -0.509405 | -0.141324 |
| C | -25.580437 | 0.889451  | 0.158176  | C | 12.827668  | 0.203345  | 0.084734  |
| O | -25.105711 | 2.107306  | 0.469365  | H | 11.768444  | -1.531026 | -0.511998 |
| C | -26.943235 | 0.693493  | 0.090682  | H | 12.734999  | 1.224233  | 0.457412  |
| C | -24.539392 | -1.390542 | -0.400465 | C | 14.149871  | -0.286376 | -0.134762 |
| N | -24.489587 | -2.518746 | -0.683733 | C | 15.274998  | 0.450647  | 0.100386  |
| C | -27.522168 | -0.567173 | -0.232617 | H | 14.244988  | -1.304376 | -0.509925 |
| N | -28.03595  | -1.579562 | -0.492915 | H | 15.141562  | 1.458057  | 0.492892  |
| C | -27.825486 | 1.784001  | 0.351756  | C | -19.241248 | -1.189761 | -0.314104 |
| N | -28.550153 | 2.670569  | 0.563892  | C | -17.954059 | -1.677084 | -0.430325 |
| C | -23.201184 | 3.131609  | -0.56456  | C | -16.819927 | -0.862446 | -0.190343 |
| H | -23.629474 | 4.107688  | -0.323093 | C | -17.058636 | 0.483059  | 0.176837  |
| H | -22.113436 | 3.22411   | -0.594954 | C | -18.346188 | 0.971465  | 0.292312  |
| H | -23.551157 | 2.831675  | -1.555151 | C | -19.477192 | 0.155855  | 0.051925  |
| C | -23.23851  | 2.51269   | 1.915119  | H | -20.074743 | -1.856191 | -0.510153 |
| H | -23.603695 | 1.779396  | 2.638064  | H | -17.801088 | -2.714556 | -0.714286 |
| H | -22.153341 | 2.58573   | 2.013849  | H | -16.22405  | 1.148783  | 0.369667  |
| H | -23.677745 | 3.485178  | 2.151099  | H | -18.498441 | 2.010314  | 0.574598  |
